# Supplementary material for: Therapy-Resistant Acute Myeloid Leukemia Stem Cells Are Resensitized to Venetoclax + Azacitidine by Targeting Fatty Acid Desaturases 1 and 2
Source: Metabolites. 2023 Mar 24;13(4):467. doi: 10.3390/metabo13040467 (PMC10142983; doi:10.3390/metabo13040467)
Supplement: Supplementary file 1 [file metabolites-13-00467-s001.zip › Supplementary Table S2_032323.xlsx]

## Sheet: volcano
LipidMolec	Class	FA	FA Group Key	Calc Mass	Formula	BaseRt	ARatio[Relapse/Diagnosis]	APValue[Relapse]	MainArea[Diagnosis]	Diagnosis-SD	Diagnosis+SD	AreaSD[Diagnosis]	MainArea[Relapse]	Relapse-SD	Relapse+SD	AreaRSD[Diagnosis]	AreaRSD[Relapse]	AreaSD[Relapse]
Cer(d15:0/24:0)	Cer	d15:0/24:0	d39:0	609.606	C39 H79 O3 N1	11.584	1.48	0.003	1209000	198046	2.21995e+06	1.01095e+06	1789000	1.41617e+06	2.16183e+06	83.619	20.84	372828
Cer(d15:0/24:2)	Cer	d15:0/24:2	d39:2	605.575	C39 H75 O3 N1	11.177	1.032	0.066	11640000	1.12889e+07	1.19911e+07	351062	12010000	4.44118e+06	1.95788e+07	3.016	63.021	7.56882e+06
Cer(d18:0/16:0)	Cer	d18:0/16:0	d34:0	539.528	C34 H69 O3 N1	10.724	2.153	0.044	316100	96473.7	535726	219626	680600	525430	835770	69.48	22.799	155170
Cer(d18:0/18:0)	Cer	d18:0/18:0	d36:0	567.559	C36 H73 O3 N1	11.01	1.336	0.018	125200	45507.7	204892	79692.3	167200	63183.2	271217	63.652	62.211	104017
Cer(d18:0/22:0)	Cer	d18:0/22:0	d40:0	623.622	C40 H81 O3 N1	11.47	0.979	0.096	468300	284848	651752	183452	458500	282688	634312	39.174	38.345	175812
Cer(d18:0/24:0)	Cer	d18:0/24:0	d42:0	651.653	C42 H85 O3 N1	11.657	0.682	0.252	664300	319376	1.00922e+06	344924	453200	337797	568603	51.923	25.464	115403
Cer(d18:0/24:1)	Cer	d18:0/24:1	d42:1	649.637	C42 H83 O3 N1	11.584	1.465	0.004	2678000	804016	4.55198e+06	1.87398e+06	3925000	2612323	5237677	69.977	33.444	1.31268e+06
Cer(d18:0/26:3)	Cer	d18:0/26:3	d44:3	673.637	C44 H83 O3 N1	11.993	104.384	0.235	48750	38407.2	59092.8	10342.8	5088000	3.52995e+06	6.64605e+06	21.216	30.622	1.55805e+06
Cer(d18:1/22:0)	Cer	d18:1/22:0	d40:1	621.606	C40 H79 O3 N1	11.389	0.814	0.147	654500	267730	1.04127e+06	386770	532600	532600	532600	59.094	0	0
Cer(d18:1/24:1)	Cer	d18:1/24:1	d42:2	647.622	C42 H81 O3 N1	11.367	1.443	0.005	2198000	576469	3.81953e+06	1.62153e+06	3172000	1.88553e+06	4.45847e+06	73.773	40.557	1.28647e+06
Cer(d18:1/24:2)	Cer	d18:1/24:2	d42:3	645.606	C42 H79 O3 N1	11.174	1.686	0.001	269400	43015.1	495785	226385	454200	395654	512746	84.033	12.89	58546.4
Cer(d22:0/2:0)	Cer	d22:0/2:0	d24:0	399.371	C24 H49 O3 N1	9.569	0.801	0.042	8948000	7.39713e+06	1.04989e+07	1.55087e+06	7163000	7163000	7163000	17.332	0	0
Cer(d22:1/2:0)	Cer	d22:1/2:0	d24:1	397.356	C24 H47 O3 N1	8.957	0.789	0.995	3592000	2.44202e+06	4.74198e+06	1.14998e+06	2832000	1.86878e+06	3.79522e+06	32.015	34.012	963220
Cer(d22:1/30:1)	Cer	d22:1/30:1	d52:2	787.778	C52 H101 O3 N1	6.215	1.436	0.751	4648	2455.31	6840.69	2192.69	6674	6674	6674	47.175	0	0
CerG1(d13:0/2:0)	CerG1	d13:0/2:0	d15:0	435.283	C21 H41 O8 N1	9.385	0.941	0.804	1600000	1241280	1958720	358720	1506000	897757	2.11424e+06	22.42	40.388	608243
CerG1(d13:0/20:5)	CerG1	d13:0/20:5	d33:5	677.487	C39 H67 O8 N1	7.778	4.33	0.144	1828000	567009	3.08899e+06	1.26099e+06	7918000	7.02596e+06	8.81004e+06	68.982	11.266	892042
CerG1(d14:1/12:0)	CerG1	d14:1/12:0	d26:1	587.44	C32 H61 O8 N1	9.858	0.731	0.964	162000	77479.7	246520	84520.3	118300	118300	118300	52.173	0	0
CerG1(d17:1/24:5)	CerG1	d17:1/24:5	d41:6	787.596	C47 H81 O8 N1	5.662	0.891	0.534	3562000	2.75068e+06	4.37332e+06	811317	3174000	3174000	3174000	22.777	0	0
CerG1(d18:0/14:0)	CerG1	d18:0/14:0	d32:0	673.549	C38 H75 O8 N1	9.559	103.363	0.181	94680	51194.4	138166	43485.6	9786000	9786000	9786000	45.929	0	0
CerG1(d18:0/18:4)	CerG1	d18:0/18:4	d36:4	721.549	C42 H75 O8 N1	10.093	4.425	0.003	86830	21064.1	152596	65765.9	384200	351547	416853	75.741	8.499	32653.2
CerG1(d18:0/6:0)	CerG1	d18:0/6:0	d24:0	561.424	C30 H59 O8 N1	5.463	0.824	0.405	24210000	1.70426e+07	3.13774e+07	7.16737e+06	19950000	18557889	21342111	29.605	6.978	1392111
CerG2(d12:0/22:5)	CerG2	d12:0/22:5	d34:5	853.555	C46 H79 O13 N1	5.569	0.965	0.58	2427000	2.10353e+06	2.75047e+06	323471	2341000	1.43674e+06	3.24526e+06	13.328	38.627	904258
CerG2(d18:1/24:0)	CerG2	d18:1/24:0	d42:1	973.743	C54 H103 O13 N1	11.153	4.236	0.007	118900	61241.8	176558	57658.2	503700	473387	534013	48.493	6.018	30312.7
CerG2(d18:1/24:1)	CerG2	d18:1/24:1	d42:2	971.727	C54 H101 O13 N1	10.906	2.352	0.029	203500	155209	251791	48290.6	478700	131978	825422	23.73	72.43	346722
CerG2(d22:0)	CerG2	d22:0	d22:0	695.446	C34 H65 O13 N1	1.243	1.217	0.135	248500	73894	423106	174606	302400	302400	302400	70.264	0	0
CerG3GNAc1(d33:2+O)	CerG3GNAc1	d33:2+O	d33:2+O	1226.71	C59 H106 O24 N2	9.141	0.4	0	4682	3820.84	5543.16	861.16	1871	1871	1871	18.393	0	0
CerP(d13:0/4:0)	CerP	d13:0/4:0	d17:0	381.228	C17 H36 O6 N1 P1	3.339	1.232	0.784	86970	21422.5	152518	65547.5	107200	63359.5	151041	75.368	40.896	43840.5
CerP(d13:0/4:0)	CerP	d13:0/4:0	d17:0	381.228	C17 H36 O6 N1 P1	7.548	1.248	0.491	7364000	1712130	13015870	5651870	9192000	9192000	9192000	76.75	0	0
CerP(d14:0/8:0)	CerP	d14:0/8:0	d22:0	451.306	C22 H46 O6 N1 P1	1.974	0.576	0.371	2712000	755292	4668708	1.95671e+06	1563000	738205	2.3878e+06	72.15	52.77	824795
CerP(d14:1/2:0)	CerP	d14:1/2:0	d16:1	365.197	C16 H32 O6 N1 P1	1.373	0.867	0.479	90580000	3.81496e+07	1.4301e+08	5.24304e+07	78550000	67543574	89556426	57.883	14.012	11006426
CerP(d15:0/2:0)	CerP	d15:0/2:0	d17:0	381.228	C17 H36 O6 N1 P1	8.429	1.476	0.684	332100	130040	534160	202060	490100	247030	733170	60.843	49.596	243070
CerP(d18:1/16:0+O)	CerP	d18:1/16:0+O	d34:1+O	633.473	C34 H68 O7 N1 P1	11.972	1.09	0.546	12650000	1.12877e+07	1.40123e+07	1.36228e+06	13790000	8.18505e+06	1.93949e+07	10.769	40.645	5.60495e+06
CerP(d18:1/17:0+O)	CerP	d18:1/17:0+O	d35:1+O	647.489	C35 H70 O7 N1 P1	11.262	0.471	0.476	48360	11591.4	85128.6	36768.6	22770	5424.04	40116	76.031	76.179	17346
CerP(d18:2/17:1)	CerP	d18:2/17:1	d35:3	627.463	C35 H66 O6 N1 P1	11.45	14.797	0.228	20550	7293.81	33806.2	13256.2	304100	163426	444774	64.507	46.259	140674
CerP(d22:2/4:0)	CerP	d22:2/4:0	d26:2	503.338	C26 H50 O6 N1 P1	1.659	1.074	0.364	252400	237216	267584	15184.4	271000	133137	408863	6.016	50.872	137863
CerP(d23:1)	CerP	d23:1	d23:1	463.306	C23 H46 O6 N1 P1	1.664	0.901	0.132	318800	298021	339579	20779.4	287200	193073	381327	6.518	32.774	94126.9
DG(10:0/19:2)	DG	10:0/19:2	1 day, 5:02:00	522.428	C32 H58 O5	1.078	0.962	0.566	4606000	2.71339e+06	6.49861e+06	1.89261e+06	4431000	3.48166e+06	5.38034e+06	41.09	21.425	949342
DG(13:0)	DG	13:00:00	13:00:00	302.209	C16 H30 O5	4.656	1.904	0.352	278200	201336	355064	76863.9	529700	529700	529700	27.629	0	0
DG(14:0)	DG	14:00:00	14:00:00	316.225	C17 H32 O5	11.409	880.177	0.23	34020	12326.8	55713.2	21693.2	29950000	1.36132e+07	4.62868e+07	63.766	54.547	1.63368e+07
DG(14:0)	DG	14:00:00	14:00:00	316.225	C17 H32 O5	9.823	236.02	0.232	18440	4572.01	32308	13868	4353000	4353000	4353000	75.206	0	0
DG(14:0/20:5)	DG	14:0/20:5	1 day, 10:05:00	586.46	C37 H62 O5	8.992	375971	0	1	1	1	0	376000	341028	410972	0	9.301	34971.8
DG(15:0)	DG	15:00:00	15:00:00	330.241	C18 H34 O5	12.841	1.066	0.927	102600	50600.3	154600	51999.7	109400	61808.8	156991	50.682	43.502	47591.2
DG(16:0)	DG	16:00:00	16:00:00	344.256	C19 H36 O5	12.487	0.943	0.436	16700000	12280512	21119488	4419488	15740000	2.50172e+06	2.89783e+07	26.464	84.106	1.32383e+07
DG(16:0)	DG	16:00:00	16:00:00	344.256	C19 H36 O5	9.2	1.134	0.58	27720000	2.29111e+07	3.25289e+07	4.80887e+06	31440000	8.96009e+06	5.39199e+07	17.348	71.501	2.24799e+07
DG(16:0)	DG	16:00:00	16:00:00	344.256	C19 H36 O5	8.852	1.683	0.372	20050000	1.09383e+07	2.91617e+07	9.11172e+06	33730000	1.35851e+07	5.38749e+07	45.445	59.724	2.01449e+07
DG(16:0)	DG	16:00:00	16:00:00	344.256	C19 H36 O5	7.55	1.766	0.002	999100	502557	1.49564e+06	496543	1765000	1765000	1765000	49.699	0	0
DG(16:0/16:0)	DG	16:0/16:0	1 day, 8:00:00	568.507	C35 H68 O5	11.089	0.911	0.341	822000	696760	947240	125240	748900	594664	903136	15.236	20.595	154236
DG(17:0p)	DG	17:0p	17:0p	342.277	C20 H38 O4	1.036	397.387	0.271	11670	1953.09	21386.9	9716.91	4637000	1.01611e+06	8.25789e+06	83.264	78.087	3.62089e+06
DG(17:1)	DG	17:01:00	17:01:00	356.256	C20 H36 O5	8.132	42.747	0.24	51140	28455.8	73824.2	22684.2	2186000	2186000	2186000	44.357	0	0
DG(17:1)	DG	17:01:00	17:01:00	356.256	C20 H36 O5	8.832	0.969	0.92	41840	20645.1	63034.9	21194.9	40540	20270.4	60809.6	50.657	49.999	20269.6
DG(18:0)	DG	18:00:00	18:00:00	372.288	C21 H40 O5	12.544	12.875	0.229	100700	41694.8	159705	59005.2	1297000	650030	1.94397e+06	58.595	49.882	646970
DG(18:0)	DG	18:00:00	18:00:00	372.288	C21 H40 O5	6.695	1.263	0.471	8192	4375.1	12008.9	3816.9	10350	5018.72	15681.3	46.593	51.51	5331.28
DG(18:1)	DG	18:01:00	18:01:00	370.272	C21 H38 O5	9.198	0.942	0.618	32270000	1.97289e+07	4.48111e+07	1.25411e+07	30410000	1.60148e+07	4.48052e+07	38.863	47.337	1.43952e+07
DG(18:1)	DG	18:01:00	18:01:00	370.272	C21 H38 O5	14.938	1.376	0.476	106600	32872.2	180328	73727.8	146600	67283.5	225916	69.163	54.104	79316.5
DG(18:1)	DG	18:01:00	18:01:00	370.272	C21 H38 O5	13.297	1.521	0.112	1704000	1.13083e+06	2.27717e+06	573174	2591000	1.53004e+06	3.65196e+06	33.637	40.948	1.06096e+06
DG(18:1/18:1)	DG	18:1/18:1	1 day, 12:02:00	620.538	C39 H72 O5	11.124	2.37	0	248400	152918	343882	95482.5	588700	383685	793715	38.439	34.825	205015
DG(18:2/18:2)	DG	18:2/18:2	1 day, 12:04:00	616.507	C39 H68 O5	8.224	0.658	0.3	6276	4047.02	8504.98	2228.98	4128	4128	4128	35.516	0	0
DG(19:0)	DG	19:00:00	19:00:00	386.303	C22 H42 O5	10.338	1.101	0.348	3059000	1.05658e+06	5.06142e+06	2.00242e+06	3370000	2.50785e+06	4.23215e+06	65.46	25.583	862147
DG(19:0)	DG	19:00:00	19:00:00	386.303	C22 H42 O5	3.349	1.341	0.16	374100	167473	580727	206627	501800	254849	748751	55.233	49.213	246951
DG(19:0/15:2)	DG	19:0/15:2	1 day, 10:02:00	592.507	C37 H68 O5	10.942	2.127	0	250700	191836	309564	58864.4	533300	533300	533300	23.48	0	0
DG(19:0e)	DG	19:0e	19:0e	372.324	C22 H44 O4	7.426	0.807	0.717	641100	335731	946469	305369	517300	269963	764637	47.632	47.813	247337
DG(19:0p)	DG	19:0p	19:0p	370.308	C22 H42 O4	1.243	21.239	0.269	30390	8970.82	51809.2	21419.2	645500	347066	943934	70.481	46.233	298434
DG(19:0p)	DG	19:0p	19:0p	370.308	C22 H42 O4	0.993	4.878	0.145	772900	226823	1.31898e+06	546077	3771000	1.3932e+06	6.1488e+06	70.653	63.055	2.3778e+06
DG(19:1)	DG	19:01:00	19:01:00	384.288	C22 H40 O5	8.919	0.969	0.045	1354000000	993511040	1714488960	360488960	1312000000	1008298240	1615701760	26.624	23.148	303701760
DG(19:1)	DG	19:01:00	19:01:00	384.288	C22 H40 O5	5.461	1.08	0.964	26450000	1.90702e+07	3.38298e+07	7.37981e+06	28560000	1.19198e+07	4.52002e+07	27.901	58.264	1.66402e+07
DG(19:1)	DG	19:01:00	19:01:00	384.288	C22 H40 O5	4.7	0.937	0.265	7338000	5261346	9414654	2076654	6873000	6873000	6873000	28.3	0	0
DG(19:1)	DG	19:01:00	19:01:00	384.288	C22 H40 O5	4.245	0.566	0.118	13560000	5.23647e+06	2.18835e+07	8.32353e+06	7673000	3.37413e+06	1.19719e+07	61.383	56.026	4.29887e+06
DG(19:1)	DG	19:01:00	19:01:00	384.288	C22 H40 O5	12.102	0.427	0.666	58070000	2.65937e+07	8.95463e+07	3.14763e+07	24820000	5.99453e+06	4.36455e+07	54.204	75.848	1.88255e+07
DG(19:1)	DG	19:01:00	19:01:00	384.288	C22 H40 O5	14.851	2.205	0.54	2457000	376068	4.53793e+06	2.08093e+06	5417000	3.36233e+06	7.47167e+06	84.694	37.93	2.05467e+06
DG(19:1)	DG	19:01:00	19:01:00	384.288	C22 H40 O5	1.873	2.376	0.45	12530000	4.90875e+06	2.01512e+07	7.62125e+06	29760000	29760000	29760000	60.824	0	0
DG(20:0p)	DG	20:0p	20:0p	384.324	C23 H44 O4	11.592	1.381	0.95	23190	6652.52	39727.5	16537.5	32030	32030	32030	71.313	0	0
DG(20:1)	DG	20:01:00	20:01:00	398.303	C23 H42 O5	4.144	28.603	0.24	27940	-17663.9	73543.9	45603.9	799200	799200	799200	163.221	0	0
DG(20:1)	DG	20:01:00	20:01:00	398.303	C23 H42 O5	11.071	0.813	0.506	4000000	1464080	6535920	2535920	3251000	2.30005e+06	4.20195e+06	63.398	29.251	950950
DG(20:1)	DG	20:01:00	20:01:00	398.303	C23 H42 O5	12.277	1.298	0.285	6074000	4.65943e+06	7.48857e+06	1.41457e+06	7882000	1.91824e+06	1.38458e+07	23.289	75.663	5.96376e+06
DG(20:1)	DG	20:01:00	20:01:00	398.303	C23 H42 O5	11.431	0.708	0.673	4464000	1.41951e+06	7.50849e+06	3.04449e+06	3160000	1.29443e+06	5.02557e+06	68.201	59.037	1.86557e+06
DG(20:1)	DG	20:01:00	20:01:00	398.303	C23 H42 O5	3.339	1.559	0.193	3440	598.01	6281.99	2841.99	5363	5363	5363	82.616	0	0
DG(20:1)	DG	20:01:00	20:01:00	398.303	C23 H42 O5	12.683	3.045	0.012	3562000	1.23459e+06	5.88941e+06	2.32741e+06	10840000	10840000	10840000	65.34	0	0
DG(20:1)	DG	20:01:00	20:01:00	398.303	C23 H42 O5	10.309	4.037	0.234	303200	157652	448748	145548	1224000	1224000	1224000	48.004	0	0
DG(20:1p/16:1)	DG	20:1p/16:1	36:2p	604.543	C39 H72 O4	1.096	169.738	0.243	33450	18894.9	48005.1	14555.1	5678000	5678000	5678000	43.513	0	0
DG(20:2)	DG	20:02:00	20:02:00	396.288	C23 H40 O5	9.381	1.269	0.142	8956000	2.93909e+06	1.49729e+07	6.01691e+06	11360000	4.4212e+06	1.82988e+07	67.183	61.081	6.9388e+06
DG(20:2)	DG	20:02:00	20:02:00	396.288	C23 H40 O5	10.403	0.931	0.891	18140000	1.4809e+07	2.1471e+07	3.33105e+06	16900000	16900000	16900000	18.363	0	0
DG(21:0p)	DG	21:0p	21:0p	398.34	C24 H46 O4	14.894	0.865	0.983	808500	191380	1.42562e+06	617120	699600	699600	699600	76.329	0	0
DG(21:1)	DG	21:01:00	21:01:00	412.319	C24 H44 O5	6.284	0.937	0.072	137600	124373	150827	13227.5	129000	23494.8	234505	9.613	81.787	105505
DG(21:1)	DG	21:01:00	21:01:00	412.319	C24 H44 O5	1.567	0.916	0.964	2828	1342.62	4313.38	1485.38	2589	2589	2589	52.524	0	0
DG(21:1)	DG	21:01:00	21:01:00	412.319	C24 H44 O5	11.031	0.676	0.936	5156000	3.18285e+06	7.12915e+06	1.97315e+06	3484000	3484000	3484000	38.269	0	0
DG(21:4/18:3)	DG	21:4/18:3	1 day, 15:07:00	652.507	C42 H68 O5	9.985	105.954	0.186	92360	-19802	204522	112162	9786000	9786000	9786000	121.44	0	0
DG(22:0)	DG	22:00:00	22:00:00	428.35	C25 H48 O5	11.351	0.703	0.175	141900	69545.2	214255	72354.8	99790	86440.1	113140	50.99	13.378	13349.9
DG(22:0p)	DG	22:0p	22:0p	412.355	C25 H48 O4	7.563	0.87	0.53	18040	11176	24904	6864.04	15700	8234.02	23166	38.049	47.554	7465.98
DG(22:1)	DG	22:01:00	22:01:00	426.334	C25 H46 O5	9.608	0.489	0.275	1954000	1.01866e+06	2.88934e+06	935341	955800	783135	1.12847e+06	47.868	18.065	172665
DG(22:2)	DG	22:02:00	22:02:00	424.319	C25 H44 O5	11.075	1.016	0.012	156200	97718.7	214681	58481.3	158700	158700	158700	37.44	0	0
DG(22:3)	DG	22:03:00	22:03:00	422.303	C25 H42 O5	10.774	0.443	0.019	162000	59371.4	264629	102629	71800	23801	119799	63.351	66.851	47999
DG(22:3)	DG	22:03:00	22:03:00	422.303	C25 H42 O5	11.081	0.568	0.002	175900	93724.8	258075	82175.2	99940	79828.1	120052	46.717	20.124	20111.9
DG(23:1e)	DG	23:1e	23:1e	426.371	C26 H50 O4	9.914	0.966	0.668	2659000	2.23547e+06	3.08253e+06	423526	2568000	2568000	2568000	15.928	0	0
DG(23:1p)	DG	23:1p	23:1p	424.355	C26 H48 O4	12.466	1.918	0.736	1148000	181614	2.11439e+06	966386	2201000	1.50399e+06	2.89801e+06	84.18	31.668	697013
DG(23:2e)	DG	23:2e	23:2e	424.355	C26 H48 O4	1.048	146.271	0.426	20790	5304.57	36275.4	15485.4	3041000	1.24867e+06	4.83333e+06	74.485	58.939	1.79233e+06
DG(23:3)	DG	23:03:00	23:03:00	436.319	C26 H44 O5	2.45	0.977	0.324	563500	517462	609538	46037.9	550400	456689	644111	8.17	17.026	93711.1
DG(23:4)	DG	23:04:00	23:04:00	434.303	C26 H42 O5	14.977	0.84	0.483	810100	546445	1.07376e+06	263655	680300	169966	1.19063e+06	32.546	75.016	510334
DG(23:4)	DG	23:04:00	23:04:00	434.303	C26 H42 O5	3.723	1.582	0.035	387700	112511	662889	275189	613300	575208	651392	70.98	6.211	38092.1
DG(24:0e)	DG	24:0e	24:0e	442.402	C27 H54 O4	1.067	4.64377e+06	0	1	1	1	0	4644000	971850	8.31615e+06	0	79.073	3.67215e+06
DG(24:1)	DG	1 day, 0:01:00	1 day, 0:01:00	454.366	C27 H50 O5	6.349	1.408	0.807	8982000	7.64027e+06	1.03237e+07	1.34173e+06	12640000	7.84893e+06	1.74311e+07	14.938	37.904	4.79107e+06
DG(24:4)	DG	1 day, 0:04:00	1 day, 0:04:00	448.319	C27 H44 O5	6.339	0.881	0.702	8787000	7.20235e+06	1.03716e+07	1.58465e+06	7745000	7745000	7745000	18.034	0	0
DG(24:5/9:0)	DG	24:5/9:0	1 day, 9:05:00	572.444	C36 H60 O5	12.562	0.815	0.661	9007	2710.39	15303.6	6296.61	7341	2507.02	12175	69.908	65.849	4833.98
DG(25:1)	DG	1 day, 1:01:00	1 day, 1:01:00	468.382	C28 H52 O5	13.034	1.013	0.643	6047000	4.891e+06	7.203e+06	1.156e+06	6126000	5.17506e+06	7.07694e+06	19.117	15.523	950939
DG(25:3p)	DG	25:3p	25:3p	448.355	C28 H48 O4	6.324	0.907	0.742	10030000	7.86944e+06	1.21906e+07	2.16056e+06	9098000	2520146	15675854	21.541	72.3	6577854
DG(25:4)	DG	1 day, 1:04:00	1 day, 1:04:00	462.334	C28 H46 O5	9.936	0.79	0.944	848300	686741	1.00986e+06	161559	670300	670300	670300	19.045	0	0
DG(25:5)	DG	1 day, 1:05:00	1 day, 1:05:00	460.319	C28 H44 O5	3.858	12.994	0.209	8995	3643.87	14346.1	5351.13	116900	25308.9	208491	59.49	78.35	91591.1
DG(26:0)	DG	1 day, 2:00:00	1 day, 2:00:00	484.413	C29 H56 O5	5.481	1.579	0.182	4171	1231.82	7110.18	2939.18	6586	3420.04	9751.96	70.467	48.071	3165.96
DG(27:3p)	DG	27:3p	27:3p	476.387	C30 H52 O4	6.21	1.036	0.112	2607000	2.45368e+06	2.76032e+06	153318	2702000	515190	4.88881e+06	5.881	80.933	2.18681e+06
DG(28:2)	DG	1 day, 4:02:00	1 day, 4:02:00	508.413	C31 H56 O5	9.918	1.071	0.125	411700	362654	460746	49045.8	440900	349162	532638	11.913	20.807	91738.1
DG(28:2)	DG	1 day, 4:02:00	1 day, 4:02:00	508.413	C31 H56 O5	7.036	1.735	0.169	1108000	851177	1.36482e+06	256823	1922000	693900	3.1501e+06	23.179	63.897	1.2281e+06
DG(28:2p)	DG	28:2p	28:2p	492.418	C31 H56 O4	6.804	1.176	0.985	41050	23946.1	58153.9	17103.9	48270	48270	48270	41.666	0	0
DG(29:2p)	DG	29:2p	29:2p	506.433	C32 H58 O4	11.113	44.824	0.231	159400	31242.4	287558	128158	7143000	7143000	7143000	80.4	0	0
DG(32:2)	DG	1 day, 8:02:00	1 day, 8:02:00	564.475	C35 H64 O5	9.602	1.083	0.782	18760	6868.79	30651.2	11891.2	20310	6887.93	33732.1	63.386	66.086	13422.1
DG(32:3)	DG	1 day, 8:03:00	1 day, 8:03:00	562.46	C35 H62 O5	9.133	1.099	0.091	32120	26306.9	37933.1	5813.08	35310	21671.2	48948.8	18.098	38.626	13638.8
DG(33:0)	DG	1 day, 9:00:00	1 day, 9:00:00	582.522	C36 H70 O5	10.938	0.833	0.918	99550	52862	146238	46688	82920	29842.9	135997	46.899	64.01	53077.1
DG(33:5)	DG	1 day, 9:05:00	1 day, 9:05:00	572.444	C36 H60 O5	11.681	0.841	0.594	23340	14649.6	32030.4	8690.42	19630	16722.8	22537.2	37.234	14.81	2907.2
DG(33:5)	DG	1 day, 9:05:00	1 day, 9:05:00	572.444	C36 H60 O5	7.49	1.64	0.403	873600	137531	1.60967e+06	736069	1433000	1433000	1433000	84.257	0	0
DG(33:6)	DG	1 day, 9:06:00	1 day, 9:06:00	570.428	C36 H58 O5	12.358	1.107	0.972	48330	20837	75823	27493	53500	52188.7	54811.3	56.886	2.451	1311.29
DG(33:6)	DG	1 day, 9:06:00	1 day, 9:06:00	570.428	C36 H58 O5	8.93	1.541	0.468	32570	10311.3	54828.7	22258.7	50190	25907.6	74472.4	68.341	48.381	24282.4
DG(34:1p)	DG	34:1p	34:1p	578.527	C37 H70 O4	11.647	0.977	0.192	1420000	1.34812e+06	1.49188e+06	71880.4	1388000	438955	2337045	5.062	68.375	949045
DG(34:4p)	DG	34:4p	34:4p	572.481	C37 H64 O4	12.167	0.83	0.819	90930	49148.6	132711	41781.4	75430	75430	75430	45.949	0	0
DG(4:0/12:0)	DG	4:0/12:0	16:00:00	344.256	C19 H36 O5	10.06	0.884	0.233	47160000	35329914	58990086	11830086	41680000	1.43996e+07	6.89604e+07	25.085	65.452	2.72804e+07
DG(4:0/12:0)	DG	4:0/12:0	16:00:00	344.256	C19 H36 O5	12.035	0.775	0.675	1141000	259920	2.02208e+06	881080	884000	774897	993103	77.22	12.342	109103
DG(4:0/14:1)	DG	4:0/14:1	18:01:00	370.272	C21 H38 O5	10.543	9.592	0.089	1178000	622950	1.73305e+06	555050	11290000	9.45955e+06	1.31204e+07	47.118	16.213	1.83045e+06
DG(4:0/14:1)	DG	4:0/14:1	18:01:00	370.272	C21 H38 O5	8.92	0.98	0.859	47870000	2.72921e+07	6.84479e+07	2.05779e+07	46930000	4.03392e+07	5.35208e+07	42.987	14.044	6.59085e+06
DG(4:0/14:1)	DG	4:0/14:1	18:01:00	370.272	C21 H38 O5	11.624	0.707	0.319	112200000	58609914	165790086	53590086	79380000	79380000	79380000	47.763	0	0
DG(4:0/14:1)	DG	4:0/14:1	18:01:00	370.272	C21 H38 O5	8.137	1.805	0.088	467200	206175	728225	261025	843000	701646	984354	55.87	16.768	141354
DG(4:0/15:0)	DG	4:0/15:0	19:00:00	386.303	C22 H42 O5	8.914	0.823	0.545	20880000	1.61448e+07	2.56152e+07	4.73517e+06	17190000	1.53273e+07	1.90527e+07	22.678	10.836	1.86271e+06
DG(4:0/15:0)	DG	4:0/15:0	19:00:00	386.303	C22 H42 O5	11.547	0.432	0.438	112200000	32420190	191979810	79779810	48440000	31578036	65301964	71.105	34.81	16861964
DG(4:0/15:1)	DG	4:0/15:1	19:01:00	384.288	C22 H40 O5	3.861	0.979	0.816	26950000	1.00246e+07	4.38754e+07	1.69254e+07	26380000	1.86472e+07	3.41128e+07	62.803	29.313	7.73277e+06
DG(4:0/15:1)	DG	4:0/15:1	19:01:00	384.288	C22 H40 O5	13.246	0.906	0	139500000	134782110	144217890	4717890	126300000	49464132	203135868	3.382	60.836	76835868
DG(4:0/15:1)	DG	4:0/15:1	19:01:00	384.288	C22 H40 O5	6.011	0.764	0.961	23930000	1.53616e+07	3.24984e+07	8.56838e+06	18280000	1.10062e+07	2.55538e+07	35.806	39.791	7.27379e+06
DG(4:0/15:1)	DG	4:0/15:1	19:01:00	384.288	C22 H40 O5	1.187	2.188	0.8	9849000	4.48277e+06	1.52152e+07	5.36623e+06	21550000	6.71649e+06	3.63835e+07	54.485	68.833	1.48335e+07
DG(4:0/15:1)	DG	4:0/15:1	19:01:00	384.288	C22 H40 O5	0.966	2.003	0.223	10670000	2.42145e+06	1.89186e+07	8.24855e+06	21380000	1.71925e+07	2.55675e+07	77.306	19.586	4.18749e+06
DG(4:0/15:1)	DG	4:0/15:1	19:01:00	384.288	C22 H40 O5	7.023	0.726	0.073	29130000	2.46376e+07	3.36224e+07	4.49243e+06	21140000	1.72126e+07	2.50674e+07	15.422	18.578	3.92739e+06
DG(4:0/15:2)	DG	4:0/15:2	19:02:00	382.272	C22 H38 O5	8.11	0.754	0.536	4291000	2.4221e+06	6.1599e+06	1.8689e+06	3234000	1.06285e+06	5.40515e+06	43.554	67.135	2.17115e+06
DG(4:0/15:2)	DG	4:0/15:2	19:02:00	382.272	C22 H38 O5	5.532	1.341	0.526	314600	180030	449170	134570	422000	374057	469943	42.775	11.361	47943.4
DG(4:0/16:0)	DG	4:0/16:0	20:00:00	400.319	C23 H44 O5	11.371	0.956	0.747	668400	258190	1.07861e+06	410210	639300	639300	639300	61.372	0	0
DG(4:0/16:1)	DG	4:0/16:1	20:01:00	398.303	C23 H42 O5	8.947	2.097	0.084	1730000	745353	2.71465e+06	984647	3628000	3628000	3628000	56.916	0	0
DG(4:0/16:1)	DG	4:0/16:1	20:01:00	398.303	C23 H42 O5	8.104	3.683	0.097	952700	243243	1.66216e+06	709457	3509000	3509000	3509000	74.468	0	0
DG(4:0/16:2)	DG	4:0/16:2	20:02:00	396.288	C23 H40 O5	6.324	0.863	0.915	13750000	1.12479e+07	1.62521e+07	2.50209e+06	11870000	8.23766e+06	1.55023e+07	18.197	30.601	3.63234e+06
DG(4:0/17:1)	DG	4:0/17:1	21:01:00	412.319	C24 H44 O5	10.744	1.108	0.766	11050000	3.9854e+06	1.81146e+07	7.0646e+06	12240000	12240000	12240000	63.933	0	0
DG(4:0/18:1)	DG	4:0/18:1	22:01:00	426.334	C25 H46 O5	9.902	70.637	0.231	122200	79902.9	164497	42297.1	8635000	5.28505e+06	1.19849e+07	34.613	38.795	3.34995e+06
DG(4:0/19:1)	DG	4:0/19:1	23:01:00	440.35	C26 H48 O5	9.281	0.879	0.698	18100	7226.24	28973.8	10873.8	15920	4753.08	27086.9	60.076	70.144	11166.9
DG(4:0/19:4)	DG	4:0/19:4	23:04:00	434.303	C26 H42 O5	3.267	5.968	0.257	1194000	685272	1.70273e+06	508728	7124000	6.4049e+06	7.8431e+06	42.607	10.094	719097
DG(4:0/19:4)	DG	4:0/19:4	23:04:00	434.303	C26 H42 O5	6.517	1.026	0.572	1074000	299302	1.8487e+06	774698	1102000	625980	1.57802e+06	72.132	43.196	476020
DG(4:0/19:4)	DG	4:0/19:4	23:04:00	434.303	C26 H42 O5	5.941	1.096	0.432	1066000	343636	1.78836e+06	722364	1168000	1168000	1168000	67.764	0	0
DG(4:0/19:4)	DG	4:0/19:4	23:04:00	434.303	C26 H42 O5	1.823	0.635	0.69	3072000	596029	5.54797e+06	2.47597e+06	1951000	1.69323e+06	2.20877e+06	80.598	13.212	257766
DG(4:0/19:4)	DG	4:0/19:4	23:04:00	434.303	C26 H42 O5	2.751	0.477	0.112	1814000	650192	2.97781e+06	1.16381e+06	866300	866300	866300	64.157	0	0
DG(4:0/19:4)	DG	4:0/19:4	23:04:00	434.303	C26 H42 O5	5.28	1.528	0.643	976100	515722	1.43648e+06	460378	1491000	1491000	1491000	47.165	0	0
DG(4:0/19:4)	DG	4:0/19:4	23:04:00	434.303	C26 H42 O5	7.727	2.162	0.253	460100	164251	755949	295849	994700	994700	994700	64.301	0	0
DG(4:0/21:1)	DG	4:0/21:1	1 day, 1:01:00	468.382	C28 H52 O5	8.929	0.89	0.972	3797000	1.76469e+06	5.82931e+06	2.03231e+06	3379000	2.33229e+06	4.42571e+06	53.524	30.977	1.04671e+06
DG(4:0/21:2)	DG	4:0/21:2	1 day, 1:02:00	466.366	C28 H50 O5	6.316	1.075	0.7	1859000	1.78064e+06	1.93736e+06	78356.9	1999000	1.71212e+06	2.28588e+06	4.215	14.351	286876
DG(4:0/22:3)	DG	4:0/22:3	1 day, 2:03:00	478.366	C29 H50 O5	7.613	1.401	0.144	1496000	1.08939e+06	1.90261e+06	406613	2096000	1.08699e+06	3.10501e+06	27.18	48.14	1.00901e+06
DG(4:0/23:3)	DG	4:0/23:3	1 day, 3:03:00	492.382	C30 H52 O5	8.071	2.499	0.057	359700	276577	442823	83123.1	899000	411068	1.38693e+06	23.109	54.275	487932
DG(40:8p)	DG	40:8p	40:8p	648.512	C43 H68 O4	12.825	0.002	0	835400	835400	835400	0	1389	-94.4659	2872.47	0	106.801	1483.47
DG(47:7)	DG	1 day, 23:07:00	1 day, 23:07:00	764.632	C50 H84 O5	11.59	40.299	0.156	14780	2756.03	26804	12024	595600	531591	659609	81.353	10.747	64009.1
DG(6:0/13:1)	DG	6:0/13:1	19:01:00	384.288	C22 H40 O5	11.632	1.044	0.395	1759000000	1495994320	2022005680	263005680	1836000000	1419980760	2252019240	14.952	22.659	416019240
DG(6:0/15:2)	DG	6:0/15:2	21:02:00	410.303	C24 H42 O5	1.078	1.792	0.735	18920000	1.5017e+07	2.2823e+07	3.90301e+06	33900000	16261491	51538509	20.629	52.031	17638509
DG(6:0/18:3)	DG	6:0/18:3	1 day, 0:03:00	450.334	C27 H46 O5	6.621	0.767	0.796	2073000	596941	3.54906e+06	1.47606e+06	1589000	1.29674e+06	1.88126e+06	71.204	18.393	292265
DG(6:0/19:5)	DG	6:0/19:5	1 day, 1:05:00	460.319	C28 H44 O5	8.912	0.941	0.23	3258000	2.76031e+06	3.75569e+06	497692	3066000	3066000	3066000	15.276	0	0
GM3(d42:1)	GM3	d42:1	d42:1	1264.84	C65 H120 O21 N2	10.183	2.488	0.019	180900	59991.9	301808	120908	450100	450100	450100	66.837	0	0
GM3(d42:2)	GM3	d42:2	d42:2	1262.82	C65 H118 O21 N2	9.929	5.707	0.001	75890	23564.6	128215	52325.4	433100	156678	709522	68.949	63.824	276422
LdMePE(8:0p)	LdMePE	8:0p	8:0p	353.197	C15 H32 O6 N1 P1	12.908	2.741	0.193	158200	35810.2	280590	122390	433500	433500	433500	77.364	0	0
LPC(14:0p)	LPC	14:0p	14:0p	451.306	C22 H46 O6 N1 P1	1.826	0.576	0.198	2712000	843757	4.58024e+06	1.86824e+06	1563000	1.24867e+06	1.87733e+06	68.888	20.111	314335
LPC(14:1)	LPC	14:01:00	14:01:00	465.286	C22 H44 O7 N1 P1	1.861	0.932	0.702	137100	113701	160499	23398.9	127800	116817	138783	17.067	8.594	10983.1
LPC(16:0)	LPC	16:00:00	16:00:00	495.332	C24 H50 O7 N1 P1	6.63	0.448	0.002	1543000	955132	2.13087e+06	587868	691900	691900	691900	38.099	0	0
LPC(18:0)	LPC	18:00:00	18:00:00	523.364	C26 H54 O7 N1 P1	7.643	0.335	0.009	1480000	692610	2.26739e+06	787390	495600	495600	495600	53.202	0	0
LPC(18:2)	LPC	18:02:00	18:02:00	519.332	C26 H50 O7 N1 P1	6.086	0.549	0.034	1145000	357458	1.93254e+06	787542	628800	628800	628800	68.781	0	0
LPC(20:5)	LPC	20:05:00	20:05:00	541.317	C28 H48 O7 N1 P1	1.856	1.007	0.681	110300	101063	119537	9236.52	111000	48716.8	173283	8.374	56.111	62283.2
LPC(31:6)	LPC	1 day, 7:06:00	1 day, 7:06:00	693.473	C39 H68 O7 N1 P1	7.087	2.594	0.239	135000	102424	167576	32575.5	350300	213900	486700	24.13	38.938	136400
LPC(33:6)	LPC	1 day, 9:06:00	1 day, 9:06:00	721.505	C41 H72 O7 N1 P1	5.765	1.06	0.482	8616000	7383912	9848088	1232088	9134000	5.6133e+06	1.26547e+07	14.3	38.545	3.5207e+06
LPC(35:6)	LPC	1 day, 11:06:00	1 day, 11:06:00	749.536	C43 H76 O7 N1 P1	10.822	0.884	0.376	17110000	1.23094e+07	2.19106e+07	4.80055e+06	15130000	6.10586e+06	2.41541e+07	28.057	59.644	9.02414e+06
LPC(35:6)	LPC	1 day, 11:06:00	1 day, 11:06:00	749.536	C43 H76 O7 N1 P1	11.294	0.711	0.973	2330000	1.74456e+06	2.91544e+06	585436	1657000	825352	2.48865e+06	25.126	50.19	831648
LPC(38:5)	LPC	1 day, 14:05:00	1 day, 14:05:00	793.598	C46 H84 O7 N1 P1	10.49	5.31	0	641500	227572	1.05543e+06	413928	3407000	1.06176e+06	5.75224e+06	64.525	68.836	2.34524e+06
LPE(10:0e)	LPE	10:0e	10:0e	355.212	C15 H34 O6 N1 P1	5.516	298.873	0.229	12540	5129.49	19950.5	7410.51	3748000	3.14229e+06	4.35371e+06	59.095	16.161	605714
LPE(12:0p)	LPE	12:0p	12:0p	381.228	C17 H36 O6 N1 P1	3.034	0.979	0.834	1850000	1.73928e+06	1.96072e+06	110722	1812000	1.29201e+06	2.33199e+06	5.985	28.697	519990
LPE(12:0p)	LPE	12:0p	12:0p	381.228	C17 H36 O6 N1 P1	6.79	0.507	0.4	1041000	391291	1.69071e+06	649709	528200	440271	616129	62.412	16.647	87929.5
LPE(14:0p)	LPE	14:0p	14:0p	409.259	C19 H40 O6 N1 P1	3.039	0.427	0.149	2301000	979260	3.62274e+06	1.32174e+06	981600	615954	1347246	57.442	37.25	365646
LPE(15:2)	LPE	15:02:00	15:02:00	435.239	C20 H38 O7 N1 P1	11.091	0.861	0.269	2170000	1.04861e+06	3.29139e+06	1.12139e+06	1869000	1869000	1869000	51.677	0	0
LPE(16:1p)	LPE	16:1p	16:1p	435.275	C21 H42 O6 N1 P1	9.362	0.878	0.939	236500	133641	339359	102859	207600	207600	207600	43.492	0	0
LPG(10:0p)	LPG	10:0p	10:0p	384.191	C16 H33 O8 N0 P1	7.043	60.589	0.237	307700	88448.4	526952	219252	18640000	16395744	20884256	71.255	12.04	2.24426e+06
LPG(12:0p)	LPG	12:0p	12:0p	412.223	C18 H37 O8 N0 P1	12.489	0.905	0.88	707900	427926	987874	279974	640300	640300	640300	39.55	0	0
LPG(12:0p)	LPG	12:0p	12:0p	412.223	C18 H37 O8 N0 P1	10.884	1.537	0.763	10280	3223.29	17336.7	7056.71	15800	8283.31	23316.7	68.645	47.574	7516.69
LPG(16:0)	LPG	16:00:00	16:00:00	484.28	C22 H45 O9 N0 P1	12.858	1.884	0.657	12920	3270.31	22569.7	9649.69	24340	21108.4	27571.6	74.688	13.277	3231.62
LPG(16:1p)	LPG	16:1p	16:1p	466.27	C22 H43 O8 N0 P1	11.622	0.904	0.941	5228000	2.60239e+06	7.85361e+06	2.62561e+06	4724000	4.39748e+06	5.05052e+06	50.222	6.912	326523
LPG(16:1p)	LPG	16:1p	16:1p	466.27	C22 H43 O8 N0 P1	10.564	0.845	0.624	5397000	4.36482e+06	6.42918e+06	1.03218e+06	4563000	4563000	4563000	19.125	0	0
LPG(16:1p)	LPG	16:1p	16:1p	466.27	C22 H43 O8 N0 P1	9.318	0.515	0.16	478900	205103	752697	273797	246700	212367	281033	57.172	13.917	34333.2
LPG(21:1)	LPG	21:01:00	21:01:00	552.343	C27 H53 O9 N0 P1	1.043	1.71076e+06	0	1	1	1	0	1711000	759924	2.66208e+06	0	55.586	951076
LPG(4:0)	LPG	04:00:00	04:00:00	316.092	C10 H21 O9 N0 P1	10.775	1.053	0.242	19850000	10096504	29603496	9753496	20910000	20910000	20910000	49.136	0	0
LPG(4:0)	LPG	04:00:00	04:00:00	316.092	C10 H21 O9 N0 P1	11.849	0.883	0.238	87540000	2.21844e+07	1.52896e+08	6.53556e+07	77250000	58601850	95898150	74.658	24.14	18648150
LPG(6:0)	LPG	06:00:00	06:00:00	344.124	C12 H25 O9 N0 P1	5.464	7569.63	0	1019	1019	1019	0	7716000	4.58971e+06	1.08423e+07	0	40.517	3.12629e+06
LPG(6:0)	LPG	06:00:00	06:00:00	344.124	C12 H25 O9 N0 P1	10.368	3507.47	0	3408	3408	3408	0	11950000	1.02604e+07	1.36396e+07	0	14.139	1.68961e+06
LPG(9:0)	LPG	09:00:00	09:00:00	386.171	C15 H31 O9 N0 P1	3.032	1.042	0.592	1324000	1231982	1416018	92018	1380000	1380000	1380000	6.95	0	0
LPMe(16:1p)	LPMe	16:1p	16:1p	406.248	C20 H39 O6 N0 P1	8.913	1.012	0.083	713800000	493414250	934185750	220385750	722400000	722400000	722400000	30.875	0	0
LPMe(16:1p)	LPMe	16:1p	16:1p	406.248	C20 H39 O6 N0 P1	9.204	0.965	0.042	556300000	545758115	566841885	10541885	536600000	136977882	936222118	1.895	74.473	399622118
LPS(10:0e)	LPS	10:0e	10:0e	399.202	C16 H34 O8 N1 P1	5.69	1.574	0.386	141100	35672.9	246527	105427	222100	181562	262638	74.718	18.252	40537.7
LPS(11:0)	LPS	11:00:00	11:00:00	427.197	C17 H34 O9 N1 P1	6.166	0.975	0.771	218100	196155	240045	21945.2	212700	212700	212700	10.062	0	0
LPS(29:0)	LPS	1 day, 5:00:00	1 day, 5:00:00	679.479	C35 H70 O9 N1 P1	11.133	0.609	0.028	1028000	724020	1.33198e+06	303980	625800	625800	625800	29.57	0	0
LPS(29:0)	LPS	1 day, 5:00:00	1 day, 5:00:00	679.479	C35 H70 O9 N1 P1	10.821	1.519	0.155	4239000	3.37195e+06	5.10605e+06	867045	6437000	5.67171e+06	7.20229e+06	20.454	11.889	765295
LPS(36:5)	LPS	1 day, 12:05:00	1 day, 12:05:00	767.51	C42 H74 O9 N1 P1	9.186	1.072	0.343	7691	1323.31	14058.7	6367.69	8249	8249	8249	82.794	0	0
LPS(8:0e)	LPS	8:0e	8:0e	371.171	C14 H30 O8 N1 P1	13.427	33.162	0.233	31310	10242.8	52377.2	21067.2	1038000	1038000	1038000	67.286	0	0
LPS(8:0p)	LPS	8:0p	8:0p	369.155	C14 H28 O8 N1 P1	11.686	0.968	0.409	126100	81736.8	170463	44363.2	122100	122100	122100	35.181	0	0
LPS(8:0p)	LPS	8:0p	8:0p	369.155	C14 H28 O8 N1 P1	10.607	0.485	0.187	5954	3419.38	8488.62	2534.62	2887	2611.7	3162.3	42.57	9.536	275.304
LPS(8:0p)	LPS	8:0p	8:0p	369.155	C14 H28 O8 N1 P1	10.288	0.485	0.394	5954	3419.38	8488.62	2534.62	2887	2887	2887	42.57	0	0
MG(10:0)	MG	10:00:00	10:00:00	246.183	C13 H26 O4	8.802	0.74	0.377	138300	47251.6	229348	91048.4	102400	102400	102400	65.834	0	0
MG(10:0p)	MG	10:0p	10:0p	230.188	C13 H26 O3	9.913	5.421	0.295	1499000	255205	2.7428e+06	1.2438e+06	8125000	2.52728e+06	1.37227e+07	82.975	68.895	5.59772e+06
MG(10:0p)	MG	10:0p	10:0p	230.188	C13 H26 O3	11.32	3.247	0.268	1549000	888460	2.20954e+06	660540	5031000	5031000	5031000	42.643	0	0
MG(11:0)	MG	11:00:00	11:00:00	260.199	C14 H28 O4	4.912	1.103	0.35	593700	292094	895306	301606	655100	477581	832619	50.801	27.098	177519
MG(11:0)	MG	11:00:00	11:00:00	260.199	C14 H28 O4	5.802	0.795	0.248	1022000	432684	1.61132e+06	589316	813000	142186	1.48381e+06	57.663	82.511	670814
MG(11:0)	MG	11:00:00	11:00:00	260.199	C14 H28 O4	7.436	0.805	0.22	1277000	740813	1.81319e+06	536187	1027000	484672	1.56933e+06	41.988	52.807	542328
MG(11:0)	MG	11:00:00	11:00:00	260.199	C14 H28 O4	7.019	0.659	0.005	1277000	748756	1.80524e+06	528244	841700	841700	841700	41.366	0	0
MG(11:0)	MG	11:00:00	11:00:00	260.199	C14 H28 O4	10.586	0.353	0.167	314400	70325	558475	244075	110900	88900.8	132899	77.632	19.837	21999.2
MG(11:0)	MG	11:00:00	11:00:00	260.199	C14 H28 O4	6.555	1.623	0.539	622900	270289	975511	352611	1011000	1011000	1011000	56.608	0	0
MG(12:0p)	MG	12:0p	12:0p	258.219	C15 H30 O3	9.744	2.27	0.587	100300	56005.5	144594	44294.5	227700	227700	227700	44.162	0	0
MG(13:1)	MG	13:01:00	13:01:00	286.214	C16 H30 O4	10.322	3392.31	0.252	10180	4756.4	15603.6	5423.6	34540000	34540000	34540000	53.277	0	0
MG(13:1)	MG	13:01:00	13:01:00	286.214	C16 H30 O4	8.268	0.877	0.111	31410	5551.09	57268.9	25858.9	27550	27550	27550	82.327	0	0
MG(14:0)	MG	14:00:00	14:00:00	302.246	C17 H34 O4	13.481	1.004	0.362	5248000	4.70809e+06	5.78791e+06	539914	5270000	5270000	5270000	10.288	0	0
MG(14:1)	MG	14:01:00	14:01:00	300.23	C17 H32 O4	1.058	0.835	0.618	3305	1679.83	4930.17	1625.17	2761	820.127	4701.87	49.173	70.296	1940.87
MG(15:0)	MG	15:00:00	15:00:00	316.261	C18 H36 O4	10.472	447.711	0.232	13990	7362.8	20617.2	6627.2	6264000	2.59248e+06	9.93552e+06	47.371	58.613	3.67152e+06
MG(15:1)	MG	15:01:00	15:01:00	314.246	C18 H34 O4	8.948	1.053	0.604	48540000	8.30665e+06	8.87733e+07	4.02333e+07	51100000	44734473	57465527	82.887	12.457	6365527
MG(16:2)	MG	16:02:00	16:02:00	326.246	C19 H34 O4	8.934	393.852	0.231	21120	8678.21	33561.8	12441.8	8318000	5.15283e+06	1.14832e+07	58.91	38.052	3.16517e+06
MG(17:3)	MG	17:03:00	17:03:00	338.246	C20 H34 O4	0.199	347.722	0.229	5171	2025.12	8316.88	3145.88	1798000	1798000	1798000	60.837	0	0
MG(17:4)	MG	17:04:00	17:04:00	336.23	C20 H32 O4	5.356	0.458	0.205	10620000	6.19125e+06	1.50488e+07	4.42875e+06	4863000	4.55926e+06	5.16674e+06	41.702	6.246	303743
MG(18:1)	MG	18:01:00	18:01:00	356.293	C21 H40 O4	8.102	1.123	0.318	559600	386846	732354	172754	628400	386837	869963	30.871	38.441	241563
MG(18:2)	MG	18:02:00	18:02:00	354.277	C21 H38 O4	9.421	1.02	0.659	840800	756224	925376	84576.1	857200	382414	1.33199e+06	10.059	55.388	474786
MG(18:3)	MG	18:03:00	18:03:00	352.261	C21 H36 O4	0.962	5.875	0.237	3640000	-1.54438e+06	8.82438e+06	5.18438e+06	21380000	21380000	21380000	142.428	0	0
MG(18:3)	MG	18:03:00	18:03:00	352.261	C21 H36 O4	11.542	0.569	0.838	25930	6265.47	45594.5	19664.5	14750	3454.16	26045.8	75.837	76.582	11295.8
MG(18:3)	MG	18:03:00	18:03:00	352.261	C21 H36 O4	10.106	0.688	0.208	1478000	598028	2.35797e+06	879972	1017000	722833	1.31117e+06	59.538	28.925	294167
MG(18:3)	MG	18:03:00	18:03:00	352.261	C21 H36 O4	4.523	4818.23	0	661.3	661.3	661.3	0	3186000	988170	5.38383e+06	0	68.984	2.19783e+06
MG(18:3)	MG	18:03:00	18:03:00	352.261	C21 H36 O4	8.552	2.41	0.383	232300	89853.6	374746	142446	560000	560000	560000	61.32	0	0
MG(19:0)	MG	19:00:00	19:00:00	372.324	C22 H44 O4	8.451	1.035	0.999	2605000	1.30909e+06	3.90091e+06	1.29591e+06	2696000	2696000	2696000	49.747	0	0
MG(19:0)	MG	19:00:00	19:00:00	372.324	C22 H44 O4	8.871	0.934	0.84	4273000	2.42104e+06	6.12496e+06	1.85196e+06	3989000	3989000	3989000	43.341	0	0
MG(19:0)	MG	19:00:00	19:00:00	372.324	C22 H44 O4	6.769	1.187	0.396	307100	185307	428893	121793	364700	309999	419401	39.659	14.999	54701.4
MG(19:1)	MG	19:01:00	19:01:00	370.308	C22 H42 O4	13.848	0.915	0.862	1050000	434700	1665300	615300	961000	225749	1.69625e+06	58.6	76.509	735251
MG(19:1)	MG	19:01:00	19:01:00	370.308	C22 H42 O4	6.784	1.05	0.882	744500	517428	971572	227072	782000	782000	782000	30.5	0	0
MG(19:1)	MG	19:01:00	19:01:00	370.308	C22 H42 O4	2.341	0.692	0.347	710200	238585	1.18182e+06	471615	491700	304431	678969	66.406	38.086	187269
MG(19:1)	MG	19:01:00	19:01:00	370.308	C22 H42 O4	2.855	0.712	0.096	767200	384582	1.14982e+06	382618	546400	546400	546400	49.872	0	0
MG(19:1)	MG	19:01:00	19:01:00	370.308	C22 H42 O4	6.09	0.611	0.739	264400	134519	394281	129881	161500	83868.6	239131	49.123	48.069	77631.4
MG(19:1)	MG	19:01:00	19:01:00	370.308	C22 H42 O4	0.989	1.569	0.249	1278000	461345	2.09465e+06	816655	2006000	2006000	2006000	63.901	0	0
MG(19:2)	MG	19:02:00	19:02:00	368.293	C22 H40 O4	4.131	1.058	0.676	11460000	6.20857e+06	1.67114e+07	5.25143e+06	12120000	1.08067e+07	1.34333e+07	45.824	10.836	1.31332e+06
MG(19:2)	MG	19:02:00	19:02:00	368.293	C22 H40 O4	11.612	1.048	0.638	1751000000	1452191850	2049808150	2.98808e+08	1836000000	1428040800	2243959200	17.065	22.22	407959200
MG(19:2)	MG	19:02:00	19:02:00	368.293	C22 H40 O4	1.654	1.185	0.954	8003000	4.54426e+06	1.14617e+07	3.45874e+06	9480000	3.70772e+06	1.52523e+07	43.218	60.889	5.77228e+06
MG(19:4)	MG	19:04:00	19:04:00	364.261	C22 H36 O4	3.042	42.998	0.248	8601	2918.58	14283.4	5682.42	369800	307293	432307	66.067	16.903	62507.3
MG(19:4)	MG	19:04:00	19:04:00	364.261	C22 H36 O4	6.172	0.982	0.63	1426000	1.03328e+06	1.81872e+06	392720	1400000	1286600	1513400	27.54	8.1	113400
MG(19:4)	MG	19:04:00	19:04:00	364.261	C22 H36 O4	1.859	0.75	0.227	9359	4700.56	14017.4	4658.44	7018	5971.2	8064.8	49.775	14.916	1046.8
MG(19:4)	MG	19:04:00	19:04:00	364.261	C22 H36 O4	14.974	0.597	0.139	38840	17177.4	60502.6	21662.6	23170	19182.9	27157.1	55.774	17.208	3987.09
MG(19:5)	MG	19:05:00	19:05:00	362.246	C22 H34 O4	11.763	1.174	0.875	21140	7276.39	35003.6	13863.6	24820	11966.7	37673.3	65.58	51.786	12853.3
MG(20:0)	MG	20:00:00	20:00:00	386.34	C23 H46 O4	11.618	1.003	0.866	6053000	3.29483e+06	8.81117e+06	2.75817e+06	6071000	6071000	6071000	45.567	0	0
MG(20:0p)	MG	20:0p	20:0p	370.345	C23 H46 O3	6.797	31.814	0.231	20780	6615.31	34944.7	14164.7	661000	661000	661000	68.165	0	0
MG(20:1)	MG	20:01:00	20:01:00	384.324	C23 H44 O4	0.245	0.059	0	5805000	5805000	5805000	0	341700	-22753.8	706154	0	106.659	364454
MG(20:1)	MG	20:01:00	20:01:00	384.324	C23 H44 O4	1.639	0.73	0.498	7070000	3.6385e+06	1.05015e+07	3.4315e+06	5159000	2.37737e+06	7.94063e+06	48.536	53.918	2.78163e+06
MG(20:1)	MG	20:01:00	20:01:00	384.324	C23 H44 O4	3.886	2.528	0.257	6638000	2.82659e+06	1.04494e+07	3.81141e+06	16780000	16780000	16780000	57.418	0	0
MG(20:2)	MG	20:02:00	20:02:00	382.308	C23 H42 O4	7.029	0.976	0.555	581400	296799	866001	284601	567400	403450	731350	48.951	28.895	163950
MG(20:2)	MG	20:02:00	20:02:00	382.308	C23 H42 O4	0.853	1.144	0.614	285500	65045.5	505955	220455	326600	119787	533413	77.217	63.323	206813
MG(20:2)	MG	20:02:00	20:02:00	382.308	C23 H42 O4	7.575	0.587	0.831	730200	227545	1.23286e+06	502655	428600	428600	428600	68.838	0	0
MG(20:2)	MG	20:02:00	20:02:00	382.308	C23 H42 O4	6.401	2.432	0.001	536500	249532	823468	286968	1305000	307210	2.30279e+06	53.489	76.459	997790
MG(20:5)	MG	20:05:00	20:05:00	376.261	C23 H36 O4	12.753	9.703	0.39	1117000	896884	1.33712e+06	220116	10840000	10840000	10840000	19.706	0	0
MG(20:5)	MG	20:05:00	20:05:00	376.261	C23 H36 O4	2.494	0.96	0.386	556300	170183	942417	386117	533900	217025	850775	69.408	59.351	316875
MG(20:5)	MG	20:05:00	20:05:00	376.261	C23 H36 O4	6.284	1.603	0.237	7365	3955.3	10774.7	3409.7	11810	2309.68	21310.3	46.296	80.443	9500.32
MG(20:5)	MG	20:05:00	20:05:00	376.261	C23 H36 O4	10.807	0.426	0.142	1032000	270415	1.79359e+06	761585	439700	439700	439700	73.797	0	0
MG(21:1)	MG	21:01:00	21:01:00	398.34	C24 H46 O4	12.671	5.52	0.099	3892000	2.61916e+06	5.16484e+06	1.27284e+06	21490000	21490000	21490000	32.704	0	0
MG(21:1)	MG	21:01:00	21:01:00	398.34	C24 H46 O4	11.725	0.967	0.137	6640000	4.12298e+06	9.15702e+06	2.51702e+06	6421000	3.45508e+06	9.38692e+06	37.907	46.191	2.96592e+06
MG(21:1)	MG	21:01:00	21:01:00	398.34	C24 H46 O4	12.148	1.021	0.117	5173000	3.97814e+06	6.36786e+06	1.19486e+06	5280000	5280000	5280000	23.098	0	0
MG(21:1)	MG	21:01:00	21:01:00	398.34	C24 H46 O4	4.699	1.076	0.11	273100	92957.8	453242	180142	294000	214632	373368	65.962	26.996	79368.2
MG(21:1)	MG	21:01:00	21:01:00	398.34	C24 H46 O4	10.767	1.052	0.203	5019000	3.68083e+06	6.35717e+06	1.33817e+06	5281000	4.098e+06	6.464e+06	26.662	22.401	1.183e+06
MG(21:1)	MG	21:01:00	21:01:00	398.34	C24 H46 O4	13.224	1.14	0.666	3337000	2.36086e+06	4.31314e+06	976139	3806000	1.25096e+06	6.36104e+06	29.252	67.132	2.55504e+06
MG(21:1)	MG	21:01:00	21:01:00	398.34	C24 H46 O4	3.449	0.814	0.993	1314000	208177	2.41982e+06	1.10582e+06	1070000	1070000	1070000	84.157	0	0
MG(21:1)	MG	21:01:00	21:01:00	398.34	C24 H46 O4	5.857	1.19	0.322	1456000	245496	2.6665e+06	1.2105e+06	1732000	1732000	1732000	83.139	0	0
MG(21:1)	MG	21:01:00	21:01:00	398.34	C24 H46 O4	2.957	0.71	0.779	954500	211775	1.69723e+06	742725	677300	288401	1.0662e+06	77.813	57.419	388899
MG(21:1)	MG	21:01:00	21:01:00	398.34	C24 H46 O4	3.788	1.22	0.165	664900	263473	1.06633e+06	401427	811500	658703	964297	60.374	18.829	152797
MG(21:1)	MG	21:01:00	21:01:00	398.34	C24 H46 O4	10.241	0.747	0.22	2040000	638010	3441990	1401990	1523000	1.09591e+06	1.95009e+06	68.725	28.043	427095
MG(21:1)	MG	21:01:00	21:01:00	398.34	C24 H46 O4	11.195	0.723	0.799	5492000	1.83301e+06	9.15099e+06	3.65899e+06	3969000	1.93596e+06	6.00204e+06	66.624	51.223	2.03304e+06
MG(21:1)	MG	21:01:00	21:01:00	398.34	C24 H46 O4	9.404	1.242	0.994	572300	292749	851851	279551	710500	495432	925568	48.847	30.27	215068
MG(21:1)	MG	21:01:00	21:01:00	398.34	C24 H46 O4	5.427	1.283	0.22	1162000	402842	1.92116e+06	759158	1491000	1491000	1491000	65.332	0	0
MG(21:1)	MG	21:01:00	21:01:00	398.34	C24 H46 O4	14.895	0.586	0.455	808500	208350	1.40865e+06	600150	474100	212672	735528	74.23	55.142	261428
MG(21:1)	MG	21:01:00	21:01:00	398.34	C24 H46 O4	0.981	1.346	0.198	1303000	675293	1.93071e+06	627707	1753000	1.44395e+06	2.06205e+06	48.174	17.63	309054
MG(21:1)	MG	21:01:00	21:01:00	398.34	C24 H46 O4	7.009	1.581	0.127	1682000	681866	2.68213e+06	1.00013e+06	2658000	1.82134e+06	3.49466e+06	59.461	31.477	836659
MG(21:1)	MG	21:01:00	21:01:00	398.34	C24 H46 O4	12.362	0.703	0.98	6074000	4.29347e+06	7.85453e+06	1.78053e+06	4273000	3.41772e+06	5.12828e+06	29.314	20.016	855284
MG(21:1)	MG	21:01:00	21:01:00	398.34	C24 H46 O4	7.927	2.222	0.065	331100	118017	544183	213083	735500	735500	735500	64.356	0	0
MG(21:1)	MG	21:01:00	21:01:00	398.34	C24 H46 O4	14.418	4.267	0.056	619700	295324	944076	324376	2644000	1.7581e+06	3.5299e+06	52.344	33.506	885899
MG(21:2)	MG	21:02:00	21:02:00	396.324	C24 H44 O4	8.554	2.38	0.469	9479000	3.81397e+06	1.5144e+07	5.66503e+06	22560000	22560000	22560000	59.764	0	0
MG(21:3)	MG	21:03:00	21:03:00	394.308	C24 H42 O4	8.946	0.719	0.14	4670000	2.88611e+06	6.45389e+06	1.78389e+06	3360000	3360000	3360000	38.199	0	0
MG(21:3)	MG	21:03:00	21:03:00	394.308	C24 H42 O4	7.335	2.772	0.326	392100	156381	627819	235719	1087000	286598	1.8874e+06	60.117	73.634	800402
MG(21:4)	MG	21:04:00	21:04:00	392.293	C24 H40 O4	7.991	17.99	0.247	195100	68361.1	321839	126739	3509000	3509000	3509000	64.961	0	0
MG(21:4)	MG	21:04:00	21:04:00	392.293	C24 H40 O4	9.523	0.946	0.612	2484000	844187	4.12381e+06	1.63981e+06	2350000	1.35837e+06	3.34163e+06	66.015	42.197	991630
MG(21:4)	MG	21:04:00	21:04:00	392.293	C24 H40 O4	11.079	0.813	0.641	4000000	1507960	6492040	2492040	3251000	1.5188e+06	4.9832e+06	62.301	53.282	1.7322e+06
MG(21:4)	MG	21:04:00	21:04:00	392.293	C24 H40 O4	11.689	0.924	0.547	112200000	86652060	137747940	25547940	103700000	103700000	103700000	22.77	0	0
MG(21:4)	MG	21:04:00	21:04:00	392.293	C24 H40 O4	10.807	1.287	0.754	1997000	892359	3.10164e+06	1.10464e+06	2570000	1.25264e+06	3.88736e+06	55.315	51.259	1.31736e+06
MG(21:4)	MG	21:04:00	21:04:00	392.293	C24 H40 O4	12.836	1.449	0.052	4008000	1.5406e+06	6.4754e+06	2.4674e+06	5809000	1.93405e+06	9.68395e+06	61.562	66.706	3.87495e+06
MG(21:4)	MG	21:04:00	21:04:00	392.293	C24 H40 O4	9.952	1.852	0.722	280600	96605	464595	183995	519800	359041	680559	65.572	30.927	160759
MG(21:4)	MG	21:04:00	21:04:00	392.293	C24 H40 O4	6.138	3.918	0.071	221000	96289.7	345710	124710	865800	761012	970588	56.43	12.103	104788
MG(21:5)	MG	21:05:00	21:05:00	390.277	C24 H38 O4	1.327	5.534	0.323	3893000	1.94187e+06	5.84413e+06	1.95113e+06	21550000	21550000	21550000	50.119	0	0
MG(21:5)	MG	21:05:00	21:05:00	390.277	C24 H38 O4	5.742	0.948	0.625	31980000	2.03741e+07	4.35859e+07	1.16059e+07	30310000	1.50553e+07	4.55647e+07	36.291	50.329	1.52547e+07
MG(21:5)	MG	21:05:00	21:05:00	390.277	C24 H38 O4	4.169	1.102	0.534	11450000	5.5213e+06	1.73787e+07	5.9287e+06	12610000	12610000	12610000	51.779	0	0
MG(21:5)	MG	21:05:00	21:05:00	390.277	C24 H38 O4	0.094	1.301	0.758	1554000	1.00362e+06	2.10438e+06	550380	2021000	503957	3.53804e+06	35.417	75.064	1.51704e+06
MG(21:5)	MG	21:05:00	21:05:00	390.277	C24 H38 O4	4.457	1.248	0.292	3712000	2.07241e+06	5.35159e+06	1.63959e+06	4633000	2.03565e+06	7.23035e+06	44.17	56.062	2.59735e+06
MG(21:5)	MG	21:05:00	21:05:00	390.277	C24 H38 O4	7.135	0.85	0.249	29460000	2.45576e+07	3.43624e+07	4.90244e+06	25040000	1.14212e+07	3.86588e+07	16.641	54.388	1.36188e+07
MG(21:5)	MG	21:05:00	21:05:00	390.277	C24 H38 O4	4.828	0.791	0.6	7206000	4.56875e+06	9.84325e+06	2.63725e+06	5696000	3.07499e+06	8.31701e+06	36.598	46.015	2.62101e+06
MG(21:5)	MG	21:05:00	21:05:00	390.277	C24 H38 O4	10.652	0.754	0.278	5507000	3.49342e+06	7.52058e+06	2.01358e+06	4153000	2.93077e+06	5.37523e+06	36.564	29.43	1.22223e+06
MG(21:5)	MG	21:05:00	21:05:00	390.277	C24 H38 O4	6.463	0.804	0.356	28780000	2.01944e+07	3.73656e+07	8.58565e+06	23140000	23140000	23140000	29.832	0	0
MG(21:5)	MG	21:05:00	21:05:00	390.277	C24 H38 O4	11.638	1.156	0.955	1772000000	1459348320	2084651680	3.12652e+08	2047000000	2047000000	2047000000	17.644	0	0
MG(21:5)	MG	21:05:00	21:05:00	390.277	C24 H38 O4	13.118	0.922	0	184800000	181109544	188490456	3690456	170300000	170300000	170300000	1.997	0	0
MG(21:6)	MG	21:06:00	21:06:00	388.261	C24 H36 O4	5.426	450.461	0.343	2992	2828.25	3155.75	163.752	1348000	586151	2.10985e+06	5.473	56.517	761849
MG(22:1)	MG	22:01:00	22:01:00	412.355	C25 H48 O4	12.848	0.898	0.491	171200	95664.8	246735	75535.2	153600	153600	153600	44.121	0	0
MG(22:1)	MG	22:01:00	22:01:00	412.355	C25 H48 O4	2.435	0.714	0.858	12900	2229.12	23570.9	10670.9	9205	2489.03	15921	82.72	72.96	6715.97
MG(22:1)	MG	22:01:00	22:01:00	412.355	C25 H48 O4	10.403	1.621	0.294	10140	4019.7	16260.3	6120.3	16430	16430	16430	60.358	0	0
MG(22:2)	MG	22:02:00	22:02:00	410.34	C25 H46 O4	6.451	0.73	0.778	6330000	4.69591e+06	7.96409e+06	1.63409e+06	4622000	1.31357e+06	7.93043e+06	25.815	71.58	3.30843e+06
MG(22:4)	MG	22:04:00	22:04:00	406.308	C25 H42 O4	12.266	0.992	0.052	2728000	1.22165e+06	4.23435e+06	1.50635e+06	2706000	1.01429e+06	4.39771e+06	55.218	62.517	1.69171e+06
MG(22:4)	MG	22:04:00	22:04:00	406.308	C25 H42 O4	12.848	1.932	0.706	18350	10226.6	26473.4	8123.36	35450	13124.7	57775.3	44.269	62.977	22325.3
MG(22:5)	MG	22:05:00	22:05:00	404.293	C25 H40 O4	9.902	1.044	0.99	33130	15111.6	51148.4	18018.4	34600	22048.5	47151.5	54.387	36.276	12551.5
MG(22:5)	MG	22:05:00	22:05:00	404.293	C25 H40 O4	6.45	1.036	0.931	5055000	4.12139e+06	5.98861e+06	933608	5235000	3.34339e+06	7.12661e+06	18.469	36.134	1.89161e+06
MG(22:5)	MG	22:05:00	22:05:00	404.293	C25 H40 O4	5.695	5.77	0.254	22470	8677.02	36263	13793	129600	36332.1	222868	61.384	71.966	93267.9
MG(22:6)	MG	22:06:00	22:06:00	402.277	C25 H38 O4	12.31	0.929	0.19	17680000	9916712	25443288	7.76329e+06	16430000	4.75221e+06	2.81078e+07	43.91	71.076	1.16778e+07
MG(22:6)	MG	22:06:00	22:06:00	402.277	C25 H38 O4	11.848	0.896	0.89	8547000	3.51068e+06	1.35833e+07	5.03632e+06	7654000	3.71801e+06	1.159e+07	58.925	51.424	3.93599e+06
MG(22:6)	MG	22:06:00	22:06:00	402.277	C25 H38 O4	1.104	1.198	0.239	1398000	911804	1.8842e+06	486196	1675000	1.07476e+06	2.27524e+06	34.778	35.835	600236
MG(22:6)	MG	22:06:00	22:06:00	402.277	C25 H38 O4	11.538	0.529	0.84	13460000	3.57646e+06	2.33435e+07	9.88354e+06	7126000	1.39427e+06	1.28577e+07	73.429	80.434	5.73173e+06
MG(23:2)	MG	23:02:00	23:02:00	424.355	C26 H48 O4	13.204	1.045	0.185	523500	215488	831512	308012	547100	257744	836456	58.837	52.889	289356
MG(23:2)	MG	23:02:00	23:02:00	424.355	C26 H48 O4	10.299	0.527	0.729	984100	357553	1.61065e+06	626547	518400	518400	518400	63.667	0	0
MG(23:3)	MG	23:03:00	23:03:00	422.34	C26 H46 O4	5.623	0.838	0.057	264700	126524	402876	138176	222000	222000	222000	52.201	0	0
MG(23:5)	MG	23:05:00	23:05:00	418.308	C26 H42 O4	11.346	0.826	0.292	2022000	1.00718e+06	3.03682e+06	1.01482e+06	1671000	641798	2.7002e+06	50.189	61.592	1.0292e+06
MG(23:5)	MG	23:05:00	23:05:00	418.308	C26 H42 O4	6.242	0.92	0.145	1204000	1.13322e+06	1.27478e+06	70783.2	1108000	994652	1.22135e+06	5.879	10.23	113348
MG(23:5)	MG	23:05:00	23:05:00	418.308	C26 H42 O4	8.899	0.554	0.112	11850000	7612440	16087560	4237560	6562000	2.09367e+06	1.10303e+07	35.76	68.094	4.46833e+06
MG(23:5)	MG	23:05:00	23:05:00	418.308	C26 H42 O4	9.417	0.714	0.195	6744000	5.27178e+06	8.21622e+06	1.47222e+06	4818000	4818000	4818000	21.83	0	0
MG(24:1)	MG	1 day, 0:01:00	1 day, 0:01:00	440.387	C27 H52 O4	10.23	0.992	0.67	271900	122311	421489	149589	269800	150225	389375	55.016	44.32	119575
MG(24:1)	MG	1 day, 0:01:00	1 day, 0:01:00	440.387	C27 H52 O4	10.847	0.961	0.94	1176000	311969	2.04003e+06	864031	1130000	614132	1.64587e+06	73.472	45.652	515868
MG(24:1)	MG	1 day, 0:01:00	1 day, 0:01:00	440.387	C27 H52 O4	14.32	0.916	0.989	105100	38992.1	171208	66107.9	96240	19079.6	173400	62.9	80.175	77160.4
MG(24:1)	MG	1 day, 0:01:00	1 day, 0:01:00	440.387	C27 H52 O4	7.826	1.968	0	6365	3115.03	9614.97	3249.97	12530	12530	12530	51.06	0	0
MG(24:4)	MG	1 day, 0:04:00	1 day, 0:04:00	434.34	C27 H46 O4	11.392	0.573	0.216	1428000	636074	2.21993e+06	791926	818400	818400	818400	55.457	0	0
MG(24:5)	MG	1 day, 0:05:00	1 day, 0:05:00	432.324	C27 H44 O4	9.604	0.42	0.414	1963000	1.02011e+06	2.90589e+06	942888	824100	725076	923124	48.033	12.016	99023.9
MG(24:6)	MG	1 day, 0:06:00	1 day, 0:06:00	430.308	C27 H42 O4	9.942	0.793	0.271	695000	524308	865692	170692	551000	551000	551000	24.56	0	0
MG(26:5)	MG	1 day, 2:05:00	1 day, 2:05:00	460.355	C29 H48 O4	4.452	0.907	0.604	635700	130446	1.14095e+06	505254	576600	576600	576600	79.48	0	0
MG(27:6)	MG	1 day, 3:06:00	1 day, 3:06:00	472.355	C30 H48 O4	4.634	0.751	0.325	152400	22890.5	281910	129510	114500	96938	132062	84.98	15.338	17562
MG(28:4)	MG	1 day, 4:04:00	1 day, 4:04:00	490.402	C31 H54 O4	9.263	1.716	0.234	580500	280666	880334	299834	996000	996000	996000	51.651	0	0
MG(29:3)	MG	1 day, 5:03:00	1 day, 5:03:00	506.433	C32 H58 O4	6.118	739.202	0	1920	1920	1920	0	1419000	1.18865e+06	1.64935e+06	0	16.233	230346
MG(29:3)	MG	1 day, 5:03:00	1 day, 5:03:00	506.433	C32 H58 O4	8.466	1.475	0.331	891300	381869	1.40073e+06	509431	1315000	486458	2.14354e+06	57.156	63.007	828542
MG(29:6)	MG	1 day, 5:06:00	1 day, 5:06:00	500.387	C32 H52 O4	9.647	0.548	0.625	209700	51242.3	368158	158458	114800	105779	123821	75.564	7.858	9020.98
MG(31:3)	MG	1 day, 7:03:00	1 day, 7:03:00	534.465	C34 H62 O4	9.162	1.9	0.162	980100	373369	1.58683e+06	606731	1862000	1.36224e+06	2.36176e+06	61.905	26.84	499761
MG(34:6)	MG	1 day, 10:06:00	1 day, 10:06:00	570.465	C37 H62 O4	9.554	225.65	0.364	1664	865.347	2462.65	798.653	375500	152074	598926	47.996	59.501	223426
MG(35:2)	MG	1 day, 11:02:00	1 day, 11:02:00	592.543	C38 H72 O4	10.867	24.132	0.071	55130	24385.7	85874.3	30744.3	1330000	731593	1.92841e+06	55.767	44.993	598407
MG(4:0)	MG	04:00:00	04:00:00	162.089	C7 H14 O4	9.011	0.85	0.698	1322000	812197	1.8318e+06	509803	1124000	1124000	1124000	38.563	0	0
MG(4:0)	MG	04:00:00	04:00:00	162.089	C7 H14 O4	12.094	1.183	0.448	5949000	3.33096e+06	8.56704e+06	2.61804e+06	7036000	7036000	7036000	44.008	0	0
MG(8:0e)	MG	8:0e	8:0e	204.173	C11 H24 O3	2.692	1.03	0.067	273800	114448	433152	159352	281900	281900	281900	58.2	0	0
MG(8:0e)	MG	8:0e	8:0e	204.173	C11 H24 O3	11.644	0.949	0.078	684500000	172329720	1196670280	512170280	649900000	298856515	1000943485	74.824	54.015	351043485
MG(8:0e)	MG	8:0e	8:0e	204.173	C11 H24 O3	12.027	1.028	0.818	475500	331747	619253	143753	489100	489100	489100	30.232	0	0
MG(8:0e)	MG	8:0e	8:0e	204.173	C11 H24 O3	13.552	0.909	0.229	2818000	1.48495e+06	4.15105e+06	1.33305e+06	2561000	804769	4.31723e+06	47.305	68.576	1.75623e+06
MG(8:0e)	MG	8:0e	8:0e	204.173	C11 H24 O3	13.862	0.924	0.356	2225000	1.73741e+06	2.71259e+06	487586	2056000	2056000	2056000	21.914	0	0
MG(8:0e)	MG	8:0e	8:0e	204.173	C11 H24 O3	13.281	26.977	0.108	1487000	881390	2.09261e+06	605610	40120000	1.55999e+07	6.46401e+07	40.727	61.117	2.45201e+07
MG(8:0p)	MG	8:0p	8:0p	202.157	C11 H22 O3	0.986	59.722	0.216	330400	61867.4	598933	268533	19730000	19730000	19730000	81.275	0	0
MG(8:0p)	MG	8:0p	8:0p	202.157	C11 H22 O3	14.558	2.407	0.06	549700	367332	732068	182368	1323000	908504	1.7375e+06	33.176	31.33	414496
PC(10:0/22:6)	PC	10:0/22:6	1 day, 8:06:00	721.468	C40 H68 O8 N1 P1	8.974	1.138	0.24	1973000	1.10362e+06	2.84238e+06	869383	2244000	2.08407e+06	2.40393e+06	44.064	7.127	159930
PC(10:0e/8:0)	PC	10:0e/8:0	18:0e	523.364	C26 H54 O7 N1 P1	7.639	0.297	0.012	1852000	764783	2.93922e+06	1.08722e+06	550200	214253	886147	58.705	61.059	335947
PC(10:0p/24:2)	PC	10:0p/24:2	34:2p	741.567	C42 H80 O7 N1 P1	10.821	5.075	0.113	507200	279401	734999	227799	2574000	2.1974e+06	2.9506e+06	44.913	14.631	376602
PC(10:0p/24:7)	PC	10:0p/24:7	34:7p	731.489	C42 H70 O7 N1 P1	10.196	0.765	0.699	10550	3880.92	17219.1	6669.08	8073	8073	8073	63.214	0	0
PC(11:0/19:3)	PC	11:0/19:3	1 day, 6:03:00	699.484	C38 H70 O8 N1 P1	10.482	2.837	0.008	18520	4272.01	32768	14248	52550	52550	52550	76.933	0	0
PC(11:0/23:2)	PC	11:0/23:2	1 day, 10:02:00	757.562	C42 H80 O8 N1 P1	8.996	0.71	0.031	760700	570221	951179	190479	540200	540200	540200	25.04	0	0
PC(12:0e/17:0)	PC	12:0e/17:0	29:0e	677.536	C37 H76 O7 N1 P1	8.999	0.752	0.84	190200	87788.7	292611	102411	143100	109039	177161	53.844	23.802	34060.7
PC(14:0/14:0)	PC	14:0/14:0	1 day, 4:00:00	677.5	C36 H72 O8 N1 P1	11.656	0.959	0.384	11940000	4.92059e+06	1.89594e+07	7.01941e+06	11450000	4549085	18350915	58.789	60.27	6900915
PC(14:0e/21:1)	PC	14:0e/21:1	35:1e	759.614	C43 H86 O7 N1 P1	10.573	2.273	0	776700	185064	1.36834e+06	591636	1765000	625198	2.9048e+06	76.173	64.578	1.1398e+06
PC(14:1/23:6)	PC	14:1/23:6	1 day, 13:07:00	789.531	C45 H76 O8 N1 P1	11.784	10.568	0.082	16210	6737.52	25682.5	9472.48	171300	171300	171300	58.436	0	0
PC(15:0/16:0)	PC	15:0/16:0	1 day, 7:00:00	719.547	C39 H78 O8 N1 P1	10.901	1.572	0.031	954500	358319	1.55068e+06	596181	1500000	711750	2288250	62.46	52.55	788250
PC(15:1/10:0)	PC	15:1/10:0	1 day, 1:01:00	633.437	C33 H64 O8 N1 P1	5.9	0.783	0.441	14630000	1.21948e+07	1.70652e+07	2.43516e+06	11460000	6.7214e+06	1.61986e+07	16.645	41.349	4.7386e+06
PC(15:1/22:6)	PC	15:1/22:6	1 day, 13:07:00	789.531	C45 H76 O8 N1 P1	10.143	21.528	0.022	126100	4177.69	248022	121922	2715000	2715000	2715000	96.687	0	0
PC(16:0p/23:2)	PC	16:0p/23:2	39:2p	811.645	C47 H90 O7 N1 P1	12.3	28.138	0	3560	3560	3560	0	100200	78123.9	122276	0	22.032	22076.1
PC(17:4/18:1)	PC	17:4/18:1	1 day, 11:05:00	765.531	C43 H76 O8 N1 P1	8.919	1.574	0.592	1499000	741450	2.25655e+06	757550	2360000	2360000	2360000	50.537	0	0
PC(18:0/10:0)	PC	18:0/10:0	1 day, 4:00:00	677.5	C36 H72 O8 N1 P1	8.91	0.729	0.709	3539000	1.24155e+06	5.83645e+06	2.29745e+06	2581000	1.21547e+06	3.94653e+06	64.918	52.907	1.36553e+06
PC(18:1/22:4)	PC	18:1/22:4	1 day, 16:05:00	835.609	C48 H86 O8 N1 P1	11.713	2.319	0.044	117400	38531.9	196268	78868.1	272300	183778	360822	67.179	32.509	88522
PC(18:3/22:4)	PC	18:3/22:4	1 day, 16:07:00	831.578	C48 H82 O8 N1 P1	10.339	5.008	0.001	513700	11984.6	1.01542e+06	501715	2573000	2573000	2573000	97.667	0	0
PC(19:0/12:0)	PC	19:0/12:0	1 day, 7:00:00	719.547	C39 H78 O8 N1 P1	10.317	2.338	0.001	277300	151633	402967	125667	648300	648300	648300	45.318	0	0
PC(19:4/22:6)	PC	19:4/22:6	1 day, 17:10:00	839.547	C49 H78 O8 N1 P1	10.192	5.266	0.004	215000	39538.5	390462	175462	1132000	757919	1.50608e+06	81.61	33.046	374081
PC(20:0/14:0)	PC	20:0/14:0	1 day, 10:00:00	761.593	C42 H84 O8 N1 P1	10.954	1.34	0.016	6708000	1.45658e+06	1.19594e+07	5.25142e+06	8992000	2.38828e+06	1.55957e+07	78.286	73.44	6.60372e+06
PC(20:0/20:4)	PC	20:0/20:4	1 day, 16:04:00	837.625	C48 H88 O8 N1 P1	10.822	1.199	0.087	2544000	1.55019e+06	3.53781e+06	993814	3051000	1.05073e+06	5.05127e+06	39.065	65.561	2.00027e+06
PC(21:4/20:4)	PC	21:4/20:4	1 day, 17:08:00	843.578	C49 H82 O8 N1 P1	10.619	6.343	0.021	13370	7800.59	18939.4	5569.41	84830	84830	84830	41.656	0	0
PC(22:2/14:1)	PC	22:2/14:1	1 day, 12:03:00	783.578	C44 H82 O8 N1 P1	11.085	1.744	0.018	1206000	320314	2.09169e+06	885686	2103000	2103000	2103000	73.44	0	0
PC(24:3/9:0)	PC	24:3/9:0	1 day, 9:03:00	741.531	C41 H76 O8 N1 P1	10.345	4.203	0	1274000	205076	2.34292e+06	1.06892e+06	5355000	835112	9.87489e+06	83.903	84.405	4.51989e+06
PC(25:0e)	PC	25:0e	25:0e	621.473	C33 H68 O7 N1 P1	7.591	25.427	0.231	4087	3171.14	5002.86	915.856	103900	69804.2	137996	22.409	32.816	34095.8
PC(25:3/15:1)	PC	25:3/15:1	1 day, 16:04:00	837.625	C48 H88 O8 N1 P1	10.256	1.201	0.004	789100	527040	1.05116e+06	262060	947700	765789	1.12961e+06	33.21	19.195	181911
PC(26:1/12:0)	PC	26:1/12:0	1 day, 14:01:00	815.64	C46 H90 O8 N1 P1	10.508	14.977	0.067	159300	123102	195498	36197.7	2386000	2.22621e+06	2.54579e+06	22.723	6.697	159790
PC(26:5/9:0)	PC	26:5/9:0	1 day, 11:05:00	765.531	C43 H76 O8 N1 P1	10.405	4.657	0.002	2519000	1.08529e+06	3.95271e+06	1.43371e+06	11730000	6.76422e+06	1.66958e+07	56.916	42.334	4.96578e+06
PC(27:0/12:0)	PC	27:0/12:0	1 day, 15:00:00	831.672	C47 H94 O8 N1 P1	10.127	467.07	0.131	4432	2363.41	6500.59	2068.59	2070000	619261	3.52074e+06	46.674	70.084	1.45074e+06
PC(27:0/9:0)	PC	27:0/9:0	1 day, 12:00:00	789.625	C44 H88 O8 N1 P1	10.146	494.928	0.236	8833	4931.99	12734	3901.01	4372000	2.9198e+06	5.8242e+06	44.164	33.216	1.4522e+06
PC(27:2/12:0)	PC	27:2/12:0	1 day, 15:02:00	827.64	C47 H90 O8 N1 P1	9.927	83.475	0.48	4380	2455.73	6304.27	1924.27	365700	365700	365700	43.933	0	0
PC(27:2/8:0)	PC	27:2/8:0	1 day, 11:02:00	771.578	C43 H82 O8 N1 P1	10.472	3.847	0	382700	92211.6	673188	290488	1472000	541637	2.40236e+06	75.905	63.204	930363
PC(27:5/15:1)	PC	27:5/15:1	1 day, 18:06:00	861.625	C50 H88 O8 N1 P1	10.182	4.164	0.173	96030	19177.2	172883	76852.8	399900	399900	399900	80.03	0	0
PC(29:4/11:0)	PC	29:4/11:0	1 day, 16:04:00	837.625	C48 H88 O8 N1 P1	11.492	1.026	0.358	4912000	4.17633e+06	5.64767e+06	735670	5041000	2.80975e+06	7.27225e+06	14.977	44.262	2.23125e+06
PC(29:6/11:0)	PC	29:6/11:0	1 day, 16:06:00	833.593	C48 H84 O8 N1 P1	10.262	3.325	0	675900	41480	1.31032e+06	634420	2247000	1.93846e+06	2.55554e+06	93.863	13.731	308536
PC(30:6)	PC	1 day, 6:06:00	1 day, 6:06:00	693.437	C38 H64 O8 N1 P1	7.078	0.928	0.696	139100	101824	176376	37276	129100	85610.1	172590	26.798	33.687	43489.9
PC(33:0e)	PC	33:0e	33:0e	733.598	C41 H84 O7 N1 P1	10.543	11.003	0.084	3673000	614456	6.73154e+06	3.05854e+06	40410000	1.60323e+07	6.47877e+07	83.271	60.326	2.43777e+07
PC(36:5p)	PC	36:5p	36:5p	763.552	C44 H78 O7 N1 P1	10.817	0.977	0.418	6959000	6.23867e+06	7.67933e+06	720326	6802000	3.80205e+06	9.80195e+06	10.351	44.104	2.99995e+06
PC(36:6p)	PC	36:6p	36:6p	761.536	C44 H76 O7 N1 P1	10.47	5.069	0	43940	9707.66	78172.3	34232.3	222800	222800	222800	77.907	0	0
PC(4:0/22:0)	PC	4:0/22:0	1 day, 2:00:00	649.468	C34 H68 O8 N1 P1	7.181	2.375	0.032	618400	279554	957246	338846	1469000	361815	2.57619e+06	54.794	75.37	1.10719e+06
PC(4:0/24:0)	PC	4:0/24:0	1 day, 4:00:00	677.5	C36 H72 O8 N1 P1	9.382	0.908	0.112	1159000	598635	1.71936e+06	560365	1053000	675657	1.43034e+06	48.349	35.835	377343
PC(40:5e)	PC	40:5e	40:5e	821.63	C48 H88 O7 N1 P1	10.857	3.359	0.001	455800	-79222.6	990823	535023	1531000	1.26866e+06	1.79334e+06	117.381	17.135	262337
PC(6:0/16:0)	PC	6:0/16:0	22:00:00	593.406	C30 H60 O8 N1 P1	6.653	1.137	0.314	485300	308534	662066	176766	552000	501288	602712	36.424	9.187	50712.2
PC(6:0/22:6)	PC	6:0/22:6	1 day, 4:06:00	665.406	C36 H60 O8 N1 P1	6.031	0.811	0.071	358400	173738	543062	184662	290900	131429	450371	51.524	54.82	159471
PC(8:0e/13:1)	PC	8:0e/13:1	21:1e	563.395	C29 H58 O7 N1 P1	9.923	1.287	0.79	283900	238238	329562	45662.5	365300	62349.4	668251	16.084	82.932	302951
PC(8:0e/19:0)	PC	8:0e/19:0	27:0e	649.505	C35 H72 O7 N1 P1	7.185	0.723	0.458	933900	150423	1.71738e+06	783477	675500	316614	1.03439e+06	83.893	53.129	358886
PC(8:0e/21:0)	PC	8:0e/21:0	29:0e	677.536	C37 H76 O7 N1 P1	8.147	22.636	0.266	638000	-737381	2.01338e+06	1.37538e+06	14440000	6244578	22635422	215.577	56.755	8195422
PC(8:0e/21:6)	PC	8:0e/21:6	29:6e	665.442	C37 H64 O7 N1 P1	6.125	1.026	0.222	456100	336789	575411	119311	467900	191418	744382	26.159	59.09	276482
PC(8:0e/8:0)	PC	8:0e/8:0	16:0e	495.332	C24 H50 O7 N1 P1	6.424	0.695	0.005	247200	180916	313484	66284.2	171900	50206.8	293593	26.814	70.793	121693
PC(8:0e/8:0)	PC	8:0e/8:0	16:0e	495.332	C24 H50 O7 N1 P1	6.676	0.448	0.005	1543000	960456	2.12554e+06	582544	691900	612470	771330	37.754	11.48	79430.1
PC(8:0p/18:0)	PC	8:0p/18:0	26:0p	633.473	C34 H68 O7 N1 P1	5.885	1.027	0.672	10320000	8.20636e+06	1.24336e+07	2.11364e+06	10600000	6417346	14782654	20.481	39.459	4.18265e+06
PC(8:0p/22:6)	PC	8:0p/22:6	30:6p	677.442	C38 H64 O7 N1 P1	8.912	0.522	0.236	2429000	930283	3.92772e+06	1.49872e+06	1269000	917398	1.6206e+06	61.701	27.707	351602
PC(8:0p/22:6)	PC	8:0p/22:6	30:6p	677.442	C38 H64 O7 N1 P1	8.26	4.382	0.381	3238000	1.61819e+06	4.85781e+06	1.61981e+06	14190000	1.18894e+07	1.64906e+07	50.025	16.213	2.30062e+06
PC(8:0p/23:5)	PC	8:0p/23:5	31:5p	693.473	C39 H68 O7 N1 P1	7.076	0.957	0.64	134000	102207	165793	31792.8	128300	128300	128300	23.726	0	0
PC(9:0/23:6)	PC	9:0/23:6	1 day, 8:06:00	721.468	C40 H68 O8 N1 P1	10.818	1.52	0.154	6077000	4.20893e+06	7.94507e+06	1.86807e+06	9239000	5.29496e+06	1.3183e+07	30.74	42.689	3.94404e+06
PC(9:0/23:6)	PC	9:0/23:6	1 day, 8:06:00	721.468	C40 H68 O8 N1 P1	5.756	0.537	0.682	7315000	4.15916e+06	1.04708e+07	3.15584e+06	3929000	3929000	3929000	43.142	0	0
PE(10:0/10:0)	PE	10:0/10:0	20:00:00	523.327	C25 H50 O8 N1 P1	9.522	10.96	0.435	2862	1588.01	4135.99	1273.99	31370	26160.4	36579.6	44.514	16.607	5209.62
PE(10:0/10:0)	PE	10:0/10:0	20:00:00	523.327	C25 H50 O8 N1 P1	10.198	0.913	0	2862	1588.01	4135.99	1273.99	2613	831.065	4394.94	44.514	68.195	1781.94
PE(10:0/10:0)	PE	10:0/10:0	20:00:00	523.327	C25 H50 O8 N1 P1	12.054	80.584	0.342	2862	1230.32	4493.68	1631.68	230600	38738.5	422462	57.012	83.201	191862
PE(10:0/15:2)	PE	10:0/15:2	1 day, 1:02:00	589.374	C30 H56 O8 N1 P1	7.339	30.769	0.041	12100	7620.46	16579.5	4479.54	372400	121138	623662	37.021	67.471	251262
PE(10:0/16:2)	PE	10:0/16:2	1 day, 2:02:00	603.39	C31 H58 O8 N1 P1	11.286	138.64	0	4515	2440.18	6589.82	2074.82	625900	95668.8	1.15613e+06	45.954	84.715	530231
PE(10:0/21:4)	PE	10:0/21:4	1 day, 7:04:00	669.437	C36 H64 O8 N1 P1	11.586	13.615	0.235	16280	7951.31	24608.7	8328.69	221700	57744	385656	51.159	73.954	163956
PE(10:0e/16:0)	PE	10:0e/16:0	26:0e	593.442	C31 H64 O7 N1 P1	10.935	35.252	0.245	212500	134190	290810	78310.5	7492000	6.73329e+06	8.25071e+06	36.852	10.127	758715
PE(10:0e/21:4)	PE	10:0e/21:4	31:4e	655.458	C36 H66 O7 N1 P1	8.298	0.896	0.392	8427000	2.13464e+06	1.47194e+07	6.29236e+06	7555000	1.86193e+06	1.32481e+07	74.669	75.355	5.69307e+06
PE(10:0e/9:0)	PE	10:0e/9:0	19:0e	495.332	C24 H50 O7 N1 P1	11.645	1.058	0.307	16220000	4.8029e+06	2.76371e+07	1.14171e+07	17170000	4.66955e+06	2.96704e+07	70.389	72.804	1.25004e+07
PE(10:0e/9:0)	PE	10:0e/9:0	19:0e	495.332	C24 H50 O7 N1 P1	12.073	0.891	0.394	18770000	14952182	22587818	3817818	16730000	4.06957e+06	2.93904e+07	20.34	75.675	1.26604e+07
PE(10:0e/9:0)	PE	10:0e/9:0	19:0e	495.332	C24 H50 O7 N1 P1	13.124	0.523	0.492	3550000	2.44286e+06	4.65714e+06	1.10714e+06	1858000	976825	2.73918e+06	31.187	47.426	881175
PE(10:0p/18:2)	PE	10:0p/18:2	28:2p	615.426	C33 H62 O7 N1 P1	11.108	61.987	0.351	8556	2756.4	14355.6	5799.6	530300	530300	530300	67.784	0	0
PE(10:0p/19:3)	PE	10:0p/19:3	29:3p	627.426	C34 H62 O7 N1 P1	8.901	0.587	0.114	2131000	831133	3.43087e+06	1.29987e+06	1250000	502062	1.99794e+06	60.998	59.835	747938
PE(10:0p/23:0)	PE	10:0p/23:0	33:0p	689.536	C38 H76 O7 N1 P1	12.367	0.013	0	327500	327500	327500	0	4306	1360.65	7251.35	0	68.401	2945.35
PE(10:0p/23:6)	PE	10:0p/23:6	33:6p	677.442	C38 H64 O7 N1 P1	8.914	0.966	0.932	2540000	975208	4.10479e+06	1.56479e+06	2455000	1.10858e+06	3.80142e+06	61.606	54.844	1.34642e+06
PE(10:0p/8:0)	PE	10:0p/8:0	18:0p	479.301	C23 H46 O7 N1 P1	7.754	8.284	0.008	171600	42181	301019	129419	1421000	1421000	1421000	75.419	0	0
PE(11:0/11:0)	PE	11:0/11:0	22:00:00	551.359	C27 H54 O8 N1 P1	8.96	201.888	0.054	18500	7804.23	29195.8	10695.8	3735000	644400	6.8256e+06	57.815	82.747	3.0906e+06
PE(11:0/23:2)	PE	11:0/23:2	1 day, 10:02:00	715.515	C39 H74 O8 N1 P1	9.242	0.715	0.671	1785000	713572	2.85643e+06	1.07143e+06	1277000	619000	1.935e+06	60.024	51.527	658000
PE(12:0)	PE	12:00:00	12:00:00	411.202	C17 H34 O8 N1 P1	3.717	12.585	0.182	20680	-2400.74	43760.7	23080.7	260200	260200	260200	111.609	0	0
PE(12:0)	PE	12:00:00	12:00:00	411.202	C17 H34 O8 N1 P1	1.817	0.933	0.75	11460	6539.53	16380.5	4920.47	10690	10690	10690	42.936	0	0
PE(12:0/14:1)	PE	12:0/14:1	1 day, 2:01:00	605.406	C31 H60 O8 N1 P1	11.664	1.153	0	4949	4949	4949	0	5705	1393.16	10016.8	0	75.58	4311.84
PE(12:0/23:6)	PE	12:0/23:6	1 day, 11:06:00	721.468	C40 H68 O8 N1 P1	7.721	1.095	0.98	7278000	3.56025e+06	1.09957e+07	3.71775e+06	7972000	4536068	11407932	51.082	43.1	3435932
PE(12:0e/22:6)	PE	12:0e/22:6	34:6e	693.473	C39 H68 O7 N1 P1	10.326	0.758	0.778	171500	63359	279641	108141	129900	74114.4	185686	63.056	42.945	55785.6
PE(12:0p/24:7)	PE	12:0p/24:7	36:7p	717.473	C41 H68 O7 N1 P1	10.592	0.592	0.028	2548	1717.66	3378.34	830.342	1510	470.289	2549.71	32.588	68.855	1039.71
PE(13:0)	PE	13:00:00	13:00:00	425.218	C18 H36 O8 N1 P1	6.645	89.968	0.002	7204	2014.6	12393.4	5189.4	648100	648100	648100	72.035	0	0
PE(13:0)	PE	13:00:00	13:00:00	425.218	C18 H36 O8 N1 P1	3.038	0.427	0.149	2301000	979260	3.62274e+06	1.32174e+06	981600	981600	981600	57.442	0	0
PE(13:1/17:3)	PE	13:1/17:3	1 day, 6:04:00	655.421	C35 H62 O8 N1 P1	8.899	63.146	0.184	14970	8140.54	21799.5	6829.46	945000	945000	945000	45.621	0	0
PE(14:0/14:1)	PE	14:0/14:1	1 day, 4:01:00	633.437	C33 H64 O8 N1 P1	9.016	482.79	0	5837	5837	5837	0	2818000	2.15538e+06	3.48062e+06	0	23.514	662625
PE(14:0/21:3)	PE	14:0/21:3	1 day, 11:03:00	727.515	C40 H74 O8 N1 P1	11.887	1.14909e+06	0	1	1	1	0	1149000	1.01978e+06	1.27822e+06	0	11.246	129217
PE(14:0p/14:1)	PE	14:0p/14:1	28:1p	617.442	C33 H64 O7 N1 P1	11.883	2.602	0.293	4836	3400.92	6271.08	1435.08	12580	5941.53	19218.5	29.675	52.77	6638.47
PE(14:0p/22:6)	PE	14:0p/22:6	36:6p	719.489	C41 H70 O7 N1 P1	10.348	1.525	0	3921	3921	3921	0	5980	3211.68	8748.32	0	46.293	2768.32
PE(14:1/14:1)	PE	14:1/14:1	1 day, 4:02:00	631.421	C33 H62 O8 N1 P1	11.866	0.978	0.083	2313000	796204	3.8298e+06	1.5168e+06	2262000	1.37136e+06	3.15264e+06	65.577	39.374	890640
PE(14:1/21:0)	PE	14:1/21:0	1 day, 11:01:00	731.547	C40 H78 O8 N1 P1	10.991	0.985	0.492	1482000	489371	2.47463e+06	992629	1460000	1.03978e+06	1.88022e+06	66.979	28.782	420217
PE(14:1/21:5)	PE	14:1/21:5	1 day, 11:06:00	721.468	C40 H68 O8 N1 P1	11.086	0.759	0	17130000	16223823	18036177	906177	13010000	4.3927e+06	2.16273e+07	5.29	66.236	8.6173e+06
PE(14:1/23:1)	PE	14:1/23:1	1 day, 13:02:00	757.562	C42 H80 O8 N1 P1	11.918	16.552	0.106	10090	5367.98	14812	4722.02	167000	167000	167000	46.799	0	0
PE(14:1/23:1)	PE	14:1/23:1	1 day, 13:02:00	757.562	C42 H80 O8 N1 P1	1.044	1.281	0.83	31240	10997.7	51482.3	20242.3	40010	40010	40010	64.796	0	0
PE(15:0)	PE	15:00:00	15:00:00	453.249	C20 H40 O8 N1 P1	2.451	0.656	0.316	2042	646.17	3437.83	1395.83	1340	822.479	1857.52	68.356	38.621	517.521
PE(15:0/13:1)	PE	15:0/13:1	1 day, 4:01:00	633.437	C33 H64 O8 N1 P1	9.977	0.458	0.068	1540000	474320	2605680	1065680	706300	706300	706300	69.2	0	0
PE(15:0/16:0)	PE	15:0/16:0	1 day, 7:00:00	677.5	C36 H72 O8 N1 P1	8.929	0.858	0.522	3563000	1.7034e+06	5.4226e+06	1.8596e+06	3058000	3058000	3058000	52.192	0	0
PE(15:1/20:0)	PE	15:1/20:0	1 day, 11:01:00	731.547	C40 H78 O8 N1 P1	11.723	0.068	0	2948000	2948000	2948000	0	199600	-71486.7	470687	0	135.815	271087
PE(15:1/23:4)	PE	15:1/23:4	1 day, 14:05:00	765.531	C43 H76 O8 N1 P1	5.689	1.015	0.375	4990000	4.60572e+06	5.37428e+06	384280	5065000	3.09841e+06	7.03159e+06	7.701	38.827	1.96659e+06
PE(15:2/23:6)	PE	15:2/23:6	1 day, 14:08:00	759.484	C43 H70 O8 N1 P1	5.689	0.704	0.751	4362000	2.89196e+06	5.83204e+06	1.47004e+06	3072000	2.40937e+06	3.73463e+06	33.701	21.57	662630
PE(16:0/16:0)	PE	16:0/16:0	1 day, 8:00:00	691.515	C37 H74 O8 N1 P1	7.633	39.94	0.185	12450	6225.25	18674.8	6224.75	497200	497200	497200	49.998	0	0
PE(16:0e)	PE	16:0e	16:0e	453.286	C21 H44 O7 N1 P1	6.076	23.44	0.203	17720	7341.75	28098.2	10378.2	415300	415300	415300	58.568	0	0
PE(16:0e/13:1)	PE	16:0e/13:1	29:1e	633.473	C34 H68 O7 N1 P1	11.791	1.09	0.353	12650000	1.12897e+07	1.40103e+07	1.36025e+06	13790000	1.16688e+07	1.59112e+07	10.753	15.382	2.12118e+06
PE(16:0e/18:3)	PE	16:0e/18:3	34:3e	699.52	C39 H74 O7 N1 P1	5.749	0.992	0.367	7046000	6.49479e+06	7.59721e+06	551209	6987000	3.56575e+06	1.04083e+07	7.823	48.966	3.42125e+06
PE(16:0e/18:3)	PE	16:0e/18:3	34:3e	699.52	C39 H74 O7 N1 P1	6.346	1.49	0.726	887900	462871	1.31293e+06	425029	1323000	1.03267e+06	1.61333e+06	47.869	21.945	290332
PE(16:0e/19:2)	PE	16:0e/19:2	35:2e	715.552	C40 H78 O7 N1 P1	11.723	3.271	0.281	39240	28544.4	49935.6	10695.6	128400	80504.2	176296	27.257	37.302	47895.8
PE(16:0p)	PE	16:0p	16:0p	451.27	C21 H42 O7 N1 P1	12.447	0.979	0.842	1700000	1052198	2347802	647802	1666000	656054	2.67595e+06	38.106	60.621	1.00995e+06
PE(16:0p)	PE	16:0p	16:0p	451.27	C21 H42 O7 N1 P1	7.566	0.821	0.421	1297000	391201	2.2028e+06	905799	1065000	787408	1.34259e+06	69.838	26.065	277592
PE(16:0p)	PE	16:0p	16:0p	451.27	C21 H42 O7 N1 P1	13.156	1.187	0.666	1417000	780980	2.05302e+06	636020	1682000	946192	2.41781e+06	44.885	43.746	735808
PE(16:0p)	PE	16:0p	16:0p	451.27	C21 H42 O7 N1 P1	7.679	0.534	0.469	297700	77893.2	517507	219807	159000	159000	159000	73.835	0	0
PE(16:0p/13:0)	PE	16:0p/13:0	29:0p	633.473	C34 H68 O7 N1 P1	5.886	1.103	0.102	10370000	9.09584e+06	1.16442e+07	1.27416e+06	11430000	11430000	11430000	12.287	0	0
PE(16:0p/13:0)	PE	16:0p/13:0	29:0p	633.473	C34 H68 O7 N1 P1	12.156	1.344	0.24	6171000	5.5386e+06	6.8034e+06	632404	8293000	7.42423e+06	9.16177e+06	10.248	10.476	868775
PE(16:0p/14:1)	PE	16:0p/14:1	30:1p	645.473	C35 H68 O7 N1 P1	4.105	2619.58	0.436	737.2	-336.635	1811.04	1073.84	1931000	1.72411e+06	2.13789e+06	145.664	10.714	206887
PE(16:0p/23:4)	PE	16:0p/23:4	39:4p	765.567	C44 H80 O7 N1 P1	5.688	1726.2	0.032	2490	581.042	4398.96	1908.96	4299000	4299000	4299000	76.665	0	0
PE(16:1/12:0)	PE	16:1/12:0	1 day, 4:01:00	633.437	C33 H64 O8 N1 P1	5.885	1.08	0.886	15200000	12676344	17723656	2.52366e+06	16420000	9769079	23070921	16.603	40.505	6650921
PE(16:1/16:1)	PE	16:1/16:1	1 day, 8:02:00	687.484	C37 H70 O8 N1 P1	6.216	1.697	0.628	374800	230806	518794	143994	636100	636100	636100	38.419	0	0
PE(16:1p/15:2)	PE	16:1p/15:2	31:3p	655.458	C36 H66 O7 N1 P1	11.647	1.847	0.171	3394000	2.25603e+06	4.53197e+06	1.13797e+06	6269000	5.00523e+06	7.53277e+06	33.529	20.159	1.26377e+06
PE(16:1p/17:2)	PE	16:1p/17:2	33:3p	683.489	C38 H70 O7 N1 P1	10.819	1.271	0.331	7270000	4.74971e+06	9.79029e+06	2.52029e+06	9239000	9239000	9239000	34.667	0	0
PE(16:1p/22:1)	PE	16:1p/22:1	38:2p	755.583	C43 H82 O7 N1 P1	10.854	8.592	0.085	355400	5085.77	705714	350314	3054000	1.75223e+06	4.35577e+06	98.569	42.625	1.30177e+06
PE(16:2/16:2)	PE	16:2/16:2	1 day, 8:04:00	683.453	C37 H66 O8 N1 P1	5.756	222.794	0.022	35880	-1210.59	72970.6	37090.6	7993000	3.19001e+06	1.2796e+07	103.374	60.09	4.80299e+06
PE(17:0p)	PE	17:0p	17:0p	465.286	C22 H44 O7 N1 P1	6.011	1.417	0.197	72330	44642.8	100017	27687.2	102500	29793.7	175206	38.279	70.933	72706.3
PE(17:1)	PE	17:01:00	17:01:00	479.265	C22 H42 O8 N1 P1	13.047	0.982	0.96	5672000	3.0251e+06	8.3189e+06	2.6469e+06	5569000	5569000	5569000	46.666	0	0
PE(17:1)	PE	17:01:00	17:01:00	479.265	C22 H42 O8 N1 P1	2.795	1.048	0.861	393500	374695	412305	18805.4	412400	181728	643072	4.779	55.934	230672
PE(17:1)	PE	17:01:00	17:01:00	479.265	C22 H42 O8 N1 P1	12.379	3642.7	0	2949	1610.77	4287.23	1338.23	10740000	2.98024e+06	1.84998e+07	45.379	72.251	7.75976e+06
PE(17:1/23:4)	PE	17:1/23:4	1 day, 16:05:00	793.562	C45 H80 O8 N1 P1	11.984	124.025	0.19	5048	3153.28	6942.72	1894.72	626100	524954	727246	37.534	16.155	101146
PE(17:3/23:6)	PE	17:3/23:6	1 day, 16:09:00	785.5	C45 H72 O8 N1 P1	11.893	0.876	0.77	5808	4582.98	7033.02	1225.02	5089	5089	5089	21.092	0	0
PE(17:4/20:5)	PE	17:4/20:5	1 day, 13:09:00	743.453	C42 H66 O8 N1 P1	5.697	2228.39	0.233	1902	-1328.26	5132.26	3230.26	4237000	4237000	4237000	169.835	0	0
PE(17:4/22:0)	PE	17:4/22:0	1 day, 15:04:00	781.562	C44 H80 O8 N1 P1	12.095	718.375	0	5785	5785	5785	0	4156000	3.22489e+06	5.08711e+06	0	22.404	931110
PE(18:0)	PE	18:00:00	18:00:00	495.296	C23 H46 O8 N1 P1	1.867	0.965	0.8	323400	296470	350330	26929.5	312100	312100	312100	8.327	0	0
PE(18:0/16:0)	PE	18:0/16:0	1 day, 10:00:00	719.547	C39 H78 O8 N1 P1	10.809	0.78	0.012	3531000	2.04621e+06	5.01579e+06	1.48479e+06	2754000	2.04537e+06	3.46263e+06	42.05	25.731	708632
PE(18:0/18:2)	PE	18:0/18:2	1 day, 12:02:00	743.547	C41 H78 O8 N1 P1	12.789	1.019	0.669	3842000	3.15474e+06	4.52926e+06	687257	3915000	2.58049e+06	5.24951e+06	17.888	34.087	1.33451e+06
PE(18:0/19:5)	PE	18:0/19:5	1 day, 13:05:00	751.515	C42 H74 O8 N1 P1	10.797	2.341	0.001	548200	244558	851842	303642	1283000	1283000	1283000	55.389	0	0
PE(18:0/19:5)	PE	18:0/19:5	1 day, 13:05:00	751.515	C42 H74 O8 N1 P1	10.526	4.697	0.427	744000	357529	1.13047e+06	386471	3495000	3495000	3495000	51.945	0	0
PE(18:0/20:5)	PE	18:0/20:5	1 day, 14:05:00	765.531	C43 H76 O8 N1 P1	7.529	22.339	0.106	405400	89605.6	721194	315794	9057000	8.08346e+06	1.00305e+07	77.897	10.749	973537
PE(18:0/8:0)	PE	18:0/8:0	1 day, 2:00:00	607.421	C31 H62 O8 N1 P1	0.849	1.068	0.477	60960	48900.3	73019.7	12059.7	65090	59914.7	70265.3	19.783	7.951	5175.31
PE(18:0e/16:2)	PE	18:0e/16:2	34:2e	701.536	C39 H76 O7 N1 P1	11.88	1405.96	0.374	4590	3442.32	5737.68	1147.68	6454000	1.57729e+06	1.13307e+07	25.004	75.561	4.87671e+06
PE(18:0e/24:7)	PE	18:0e/24:7	42:7e	803.583	C47 H82 O7 N1 P1	11.573	883366	0.351	1	1	1	0	883400	749212	1.01759e+06	0	15.19	134188
PE(18:0p/18:1)	PE	18:0p/18:1	36:1p	729.567	C41 H80 O7 N1 P1	11.098	1.874	0.001	1089000	334693	1.84331e+06	754307	2040000	1.55187e+06	2.52813e+06	69.266	23.928	488131
PE(18:0p/18:1)	PE	18:0p/18:1	36:1p	729.567	C41 H80 O7 N1 P1	10.775	2.513	0	12950000	1.9877e+06	2.39123e+07	1.09623e+07	32540000	32540000	32540000	84.651	0	0
PE(18:0p/18:2)	PE	18:0p/18:2	36:2p	727.552	C41 H78 O7 N1 P1	10.823	1.084	0.008	11620000	1.0331e+07	1.2909e+07	1.28901e+06	12600000	7.35701e+06	17842986	11.093	41.611	5.24299e+06
PE(18:0p/22:0)	PE	18:0p/22:0	40:0p	787.645	C45 H90 O7 N1 P1	7.969	31.281	0.201	103600	20012.4	187188	83587.6	3241000	2.60113e+06	3.88087e+06	80.683	19.743	639871
PE(18:0p/22:4)	PE	18:0p/22:4	40:4p	779.583	C45 H82 O7 N1 P1	10.99	2.812	0	2154000	674137	3.63386e+06	1.47986e+06	6056000	6056000	6056000	68.703	0	0
PE(18:0p/23:6)	PE	18:0p/23:6	41:6p	789.567	C46 H80 O7 N1 P1	6.586	0.754	0.899	413100	136984	689216	276116	311300	302951	319649	66.84	2.682	8349.07
PE(18:0p/24:0)	PE	18:0p/24:0	42:0p	815.677	C47 H94 O7 N1 P1	8.686	34.106	0.211	131800	27319.5	236280	104480	4496000	4496000	4496000	79.272	0	0
PE(18:0p/24:6)	PE	18:0p/24:6	42:6p	803.583	C47 H82 O7 N1 P1	10.202	3.016	0.015	609800	119246	1.10035e+06	490554	1839000	1839000	1839000	80.445	0	0
PE(18:1/14:0)	PE	18:1/14:0	1 day, 8:01:00	689.5	C37 H72 O8 N1 P1	10.826	1.695	0.545	601400	335028	867772	266372	1019000	1019000	1019000	44.292	0	0
PE(18:1/18:1)	PE	18:1/18:1	1 day, 12:02:00	743.547	C41 H78 O8 N1 P1	8.912	4.545	0.099	1399000	534894	2.26311e+06	864106	6359000	1.77213e+06	1.09459e+07	61.766	72.132	4.58687e+06
PE(18:1/18:1)	PE	18:1/18:1	1 day, 12:02:00	743.547	C41 H78 O8 N1 P1	10.288	4.506	0.003	2577000	1.03472e+06	4.11928e+06	1.54228e+06	11610000	5.38379e+06	1.78362e+07	59.848	53.628	6.22621e+06
PE(18:1/22:1)	PE	18:1/22:1	1 day, 16:02:00	799.609	C45 H86 O8 N1 P1	11.967	1.014	0.361	4269	3776.23	4761.77	492.771	4328	2457.87	6198.13	11.543	43.21	1870.13
PE(18:1/24:2)	PE	18:1/24:2	1 day, 18:03:00	825.625	C47 H88 O8 N1 P1	12.178	0.95	0	3762	2362.16	5161.84	1399.84	3574	1156.12	5991.88	37.21	67.652	2417.88
PE(18:1p/16:0)	PE	18:1p/16:0	34:1p	701.536	C39 H76 O7 N1 P1	10.797	2.872	0	1242000	206718	2.27728e+06	1.03528e+06	3567000	948893	6.18511e+06	83.356	73.398	2.61811e+06
PE(18:1p/22:1)	PE	18:1p/22:1	40:2p	783.614	C45 H86 O7 N1 P1	11.086	1.641	0.177	342000	183073	500927	158927	561100	440912	681288	46.47	21.42	120188
PE(18:1p/22:4)	PE	18:1p/22:4	40:5p	777.567	C45 H80 O7 N1 P1	11.095	1.653	0.019	1206000	320314	2.09169e+06	885686	1994000	401432	3.58657e+06	73.44	79.868	1.59257e+06
PE(18:2/18:2)	PE	18:2/18:2	1 day, 12:04:00	739.515	C41 H74 O8 N1 P1	6.641	3.167	0.073	84310	75921.2	92698.8	8388.84	267000	180999	353001	9.95	32.21	86000.7
PE(18:3/13:0)	PE	18:3/13:0	1 day, 7:03:00	671.453	C36 H66 O8 N1 P1	5.817	0.396	0.106	11150000	6003383	16296617	5146617	4418000	4418000	4418000	46.158	0	0
PE(18:4/19:2)	PE	18:4/19:2	1 day, 13:06:00	749.5	C42 H72 O8 N1 P1	10.482	5.597	0	227100	38193.7	416006	188906	1271000	1.06343e+06	1.47857e+06	83.182	16.331	207567
PE(18:4/9:0)	PE	18:4/9:0	1 day, 3:04:00	613.374	C32 H56 O8 N1 P1	5.297	45.921	0.21	5006	3840.15	6171.85	1165.85	229900	229900	229900	23.289	0	0
PE(19:0)	PE	19:00:00	19:00:00	509.312	C24 H48 O8 N1 P1	9.251	123.735	0	4093	4093	4093	0	506500	396468	616532	0	21.724	110032
PE(19:0)	PE	19:00:00	19:00:00	509.312	C24 H48 O8 N1 P1	5.728	0.041	0	105100	105100	105100	0	4338	-5866.28	14542.3	0	235.23	10204.3
PE(19:0/17:2)	PE	19:0/17:2	1 day, 12:02:00	743.547	C41 H78 O8 N1 P1	8.018	0.796	0.366	13290000	3.01311e+06	2.35669e+07	1.02769e+07	10570000	10570000	10570000	77.328	0	0
PE(19:0/17:2)	PE	19:0/17:2	1 day, 12:02:00	743.547	C41 H78 O8 N1 P1	5.69	1.038	0.618	5964000	5.15009e+06	6.77791e+06	813907	6189000	6189000	6189000	13.647	0	0
PE(19:0/19:0)	PE	19:0/19:0	1 day, 14:00:00	775.609	C43 H86 O8 N1 P1	11.438	1.131	0.674	2264000	1.43092e+06	3.09708e+06	833084	2561000	1.17757e+06	3.94443e+06	36.797	54.019	1.38343e+06
PE(19:0e)	PE	19:0e	19:0e	495.332	C24 H50 O7 N1 P1	7.598	0.887	0.338	2992000	1.39741e+06	4.58659e+06	1.59459e+06	2652000	2652000	2652000	53.295	0	0
PE(19:0e)	PE	19:0e	19:0e	495.332	C24 H50 O7 N1 P1	9.466	0.745	0.529	1917000	423657	3410343	1493343	1429000	1429000	1429000	77.9	0	0
PE(19:0e)	PE	19:0e	19:0e	495.332	C24 H50 O7 N1 P1	1.063	0.705	0.924	3154	1338.53	4969.47	1815.47	2224	839.071	3608.93	57.561	62.272	1384.93
PE(19:1)	PE	19:01:00	19:01:00	507.296	C24 H46 O8 N1 P1	9.264	1.898	0.237	536300	114291	958309	422009	1018000	901897	1.1341e+06	78.689	11.405	116103
PE(19:1)	PE	19:01:00	19:01:00	507.296	C24 H46 O8 N1 P1	10.562	848895	0	1	1	1	0	848900	161936	1.53586e+06	0	80.924	686964
PE(19:1)	PE	19:01:00	19:01:00	507.296	C24 H46 O8 N1 P1	12.143	2.5653e+06	0	1	1	1	0	2565000	883360	4.24664e+06	0	65.561	1.68164e+06
PE(19:2/13:1)	PE	19:2/13:1	1 day, 8:03:00	685.468	C37 H68 O8 N1 P1	7.702	0.528	0.208	12900	4897.48	20902.5	8002.52	6816	1490.11	12141.9	62.035	78.138	5325.89
PE(19:2/14:1)	PE	19:2/14:1	1 day, 9:03:00	699.484	C38 H70 O8 N1 P1	13.379	2.032	0.583	2250000	1.81753e+06	2.68247e+06	432472	4572000	2.63937e+06	6.50463e+06	19.221	42.271	1.93263e+06
PE(19:2/19:2)	PE	19:2/19:2	1 day, 14:04:00	767.547	C43 H78 O8 N1 P1	10.105	8.183	0.01	126100	4177.69	248022	121922	1032000	731182	1.33282e+06	96.687	29.149	300818
PE(19:3/12:0)	PE	19:3/12:0	1 day, 7:03:00	671.453	C36 H66 O8 N1 P1	11.596	1.017	0.065	6888000	6.75623e+06	7.01977e+06	131767	7005000	7005000	7005000	1.913	0	0
PE(19:4/14:1)	PE	19:4/14:1	1 day, 9:05:00	695.453	C38 H66 O8 N1 P1	10.575	50.415	0.02	42270	13228.8	71311.2	29041.2	2131000	2131000	2131000	68.704	0	0
PE(19:5/21:3)	PE	19:5/21:3	1 day, 16:08:00	787.515	C45 H74 O8 N1 P1	5.629	1.072	0.348	41760	27465.6	56054.4	14294.4	44770	44770	44770	34.23	0	0
PE(19:5/23:1)	PE	19:5/23:1	1 day, 18:06:00	819.578	C47 H82 O8 N1 P1	12.066	0.791	0.795	3348	1618.16	5077.84	1729.84	2649	1195.1	4102.9	51.668	54.885	1453.9
PE(20:0/19:0)	PE	20:0/19:0	1 day, 15:00:00	789.625	C44 H88 O8 N1 P1	13.584	1.384	0.665	7327	2566.87	12087.1	4760.13	10140	3299.05	16981	64.967	67.465	6840.95
PE(20:0e)	PE	20:0e	20:0e	509.348	C25 H52 O7 N1 P1	8.056	38.252	0.085	10220	-2771.87	23211.9	12991.9	390900	390900	390900	127.122	0	0
PE(20:0e)	PE	20:0e	20:0e	509.348	C25 H52 O7 N1 P1	9.243	1.754	0.412	4133	2119.77	6146.23	2013.23	7250	6843.71	7656.29	48.711	5.604	406.29
PE(20:1)	PE	20:01:00	20:01:00	521.312	C25 H48 O8 N1 P1	6.287	2.532	0	22340	14449.3	30230.7	7890.71	56550	41799.5	71300.5	35.321	26.084	14750.5
PE(20:1/18:1)	PE	20:1/18:1	1 day, 14:02:00	771.578	C43 H82 O8 N1 P1	10.58	5.004	0	1137000	-51335.6	2.32534e+06	1.18834e+06	5689000	5689000	5689000	104.515	0	0
PE(20:1p/13:0)	PE	20:1p/13:0	33:1p	687.52	C38 H74 O7 N1 P1	7.404	1.051	0.756	250900	228853	272947	22046.6	263700	263700	263700	8.787	0	0
PE(20:2/13:1)	PE	20:2/13:1	1 day, 9:03:00	699.484	C38 H70 O8 N1 P1	1.049	109.216	0.182	112700	57853.4	167547	54846.6	12310000	5.13352e+06	1.94865e+07	48.666	58.298	7.17648e+06
PE(20:2/20:3)	PE	20:2/20:3	1.67014	793.562	C45 H80 O8 N1 P1	10.49	4.369	0	286800	77533.5	496066	209266	1253000	1.06743e+06	1.43857e+06	72.966	14.81	185569
PE(20:4/21:5)	PE	20:4/21:5	1 day, 17:09:00	799.515	C46 H74 O8 N1 P1	11.073	7.528	0.146	114800	20840.8	208759	93959.2	864400	864400	864400	81.846	0	0
PE(20:5/13:1)	PE	20:5/13:1	1 day, 9:06:00	693.437	C38 H64 O8 N1 P1	10.308	0.925	0.203	1045000	824839	1.26516e+06	220161	966600	898832	1.03437e+06	21.068	7.011	67768.3
PE(20:5/22:5)	PE	20:5/22:5	1 day, 18:10:00	811.515	C47 H74 O8 N1 P1	12.211	1.93687e+06	0	1	1	1	0	1937000	1.37235e+06	2.50165e+06	0	29.151	564655
PE(20:5/24:6)	PE	20:5/24:6	1 day, 20:11:00	837.531	C49 H76 O8 N1 P1	12.122	166.598	0.199	5073	4340.71	5805.29	732.288	845100	208689	1.48151e+06	14.435	75.306	636411
PE(21:1)	PE	21:01:00	21:01:00	535.327	C26 H50 O8 N1 P1	6.562	13.427	0.25	17410	7081.69	27738.3	10328.3	233700	53435.5	413964	59.324	77.135	180264
PE(21:1e)	PE	21:1e	21:1e	521.348	C26 H52 O7 N1 P1	6.439	543.877	0.539	2027	1693.29	2360.71	333.705	1102000	1102000	1102000	16.463	0	0
PE(21:3)	PE	21:03:00	21:03:00	531.296	C26 H46 O8 N1 P1	11.498	1.016	0.7	735500	336859	1134141	398641	747600	747600	747600	54.2	0	0
PE(22:0)	PE	22:00:00	22:00:00	551.359	C27 H54 O8 N1 P1	7.625	1243.52	0.222	15190	6619.8	23760.2	8570.2	18890000	18890000	18890000	56.42	0	0
PE(22:1p)	PE	22:1p	22:1p	533.348	C27 H52 O7 N1 P1	10.953	1.121	0.583	885900	761670	1.01013e+06	124230	993100	610200	1.376e+06	14.023	38.556	382900
PE(22:2)	PE	22:02:00	22:02:00	547.327	C27 H50 O8 N1 P1	6.949	2.461	0.055	2448	1433.55	3462.45	1014.45	6024	1289.14	10758.9	41.44	78.6	4734.86
PE(22:2)	PE	22:02:00	22:02:00	547.327	C27 H50 O8 N1 P1	6.553	14.006	0.262	14170	4709.12	23630.9	9460.88	198500	31357	365643	66.767	84.203	167143
PE(22:2)	PE	22:02:00	22:02:00	547.327	C27 H50 O8 N1 P1	10.811	1.115	0	36720000	3.56232e+07	3.78168e+07	1.09683e+06	40960000	40960000	40960000	2.987	0	0
PE(22:3)	PE	22:03:00	22:03:00	545.312	C27 H48 O8 N1 P1	11.539	373.246	0.423	3858	3049.21	4666.79	808.791	1440000	1.292e+06	1.588e+06	20.964	10.278	148003
PE(22:3/21:1)	PE	22:3/21:1	1 day, 19:04:00	837.625	C48 H88 O8 N1 P1	11.439	1.088	0.558	4778000	4.07415e+06	5.48185e+06	703847	5199000	2.64588e+06	7.75212e+06	14.731	49.108	2.55312e+06
PE(22:5/17:2)	PE	22:5/17:2	1 day, 15:07:00	775.515	C44 H74 O8 N1 P1	12.109	3.18355e+06	0	1	1	1	0	3184000	2.62607e+06	3.74193e+06	0	17.523	557932
PE(22:5/22:6)	PE	22:5/22:6	1 day, 20:11:00	837.531	C49 H76 O8 N1 P1	8.621	1170.47	0.242	4840	3703.23	5976.77	1136.77	5665000	5665000	5665000	23.487	0	0
PE(22:5/22:6)	PE	22:5/22:6	1 day, 20:11:00	837.531	C49 H76 O8 N1 P1	7.842	1.378	0.07	2207000	1.48822e+06	2.92578e+06	718776	3041000	946998	5.135e+06	32.568	68.859	2.094e+06
PE(22:6/13:0)	PE	22:6/13:0	1 day, 11:06:00	721.468	C40 H68 O8 N1 P1	5.762	0.537	0.682	7315000	4.15916e+06	1.04708e+07	3.15584e+06	3929000	3929000	3929000	43.142	0	0
PE(22:6/23:4)	PE	22:6/23:4	1 day, 21:10:00	853.562	C50 H80 O8 N1 P1	5.582	0.969	0.554	2427000	2.10353e+06	2.75047e+06	323471	2353000	2353000	2353000	13.328	0	0
PE(23:1)	PE	23:01:00	23:01:00	563.359	C28 H54 O8 N1 P1	5.828	127.147	0	1413	1413	1413	0	179700	54220.9	305179	0	69.827	125479
PE(23:3)	PE	23:03:00	23:03:00	559.327	C28 H50 O8 N1 P1	9.386	1.059	0.995	344600	98252.4	590948	246348	365100	168136	562064	71.488	53.948	196964
PE(24:0e)	PE	24:0e	24:0e	565.411	C29 H60 O7 N1 P1	10.946	1.276	0.196	944200	819509	1.06889e+06	124691	1205000	1205000	1205000	13.206	0	0
PE(24:1e)	PE	24:1e	24:1e	563.395	C29 H58 O7 N1 P1	9.931	0.898	0.218	297900	252700	343100	45200.4	267600	267600	267600	15.173	0	0
PE(24:2/24:7)	PE	24:2/24:7	2 days, 0:09:00	897.625	C53 H88 O8 N1 P1	11.895	252.802	0	4357	4357	4357	0	1101000	968396	1.2336e+06	0	12.044	132604
PE(24:2e)	PE	24:2e	24:2e	561.379	C29 H56 O7 N1 P1	10.722	0.799	0.888	10670	7026.62	14313.4	3643.38	8523	8523	8523	34.146	0	0
PE(24:4/13:0)	PE	24:4/13:0	1 day, 13:04:00	753.531	C42 H76 O8 N1 P1	10.482	7.627	0	111200	4668.18	217732	106532	848200	699349	997051	95.802	17.549	148851
PE(24:4/14:0)	PE	24:4/14:0	1 day, 14:04:00	767.547	C43 H78 O8 N1 P1	8.517	0.61	0.567	1375000	224785	2525215	1150215	838400	430971	1.24583e+06	83.652	48.596	407429
PE(24:4/19:3)	PE	24:4/19:3	1 day, 19:07:00	831.578	C48 H82 O8 N1 P1	5.587	1.008	0.781	2448000	2.15094e+06	2.74506e+06	297065	2467000	814924	4.11908e+06	12.135	66.967	1.65208e+06
PE(24:5/17:3)	PE	24:5/17:3	1 day, 17:08:00	801.531	C46 H76 O8 N1 P1	12.125	1.13	0.738	9724	6158.4	13289.6	3565.6	10990	10990	10990	36.668	0	0
PE(24:5/22:1)	PE	24:5/22:1	1 day, 22:06:00	875.64	C51 H90 O8 N1 P1	5.52	0.977	0.351	1201000	1.0919e+06	1.3101e+06	109099	1173000	1173000	1173000	9.084	0	0
PE(24:6/17:2)	PE	24:6/17:2	1 day, 17:08:00	801.531	C46 H76 O8 N1 P1	10.989	3.901	0.004	215000	63844.2	366156	151156	838600	835992	841208	70.305	0.311	2608.05
PE(24:6/21:1)	PE	24:6/21:1	1 day, 21:07:00	859.609	C50 H86 O8 N1 P1	5.531	0.323	0.32	1200000	398316	2001684	801684	388100	179690	596510	66.807	53.7	208410
PE(24:6/24:6)	PE	24:6/24:6	2 days, 0:12:00	891.578	C53 H82 O8 N1 P1	12.113	0.963	0.236	356100	76355	635845	279745	342900	342900	342900	78.558	0	0
PE(25:0/12:0)	PE	25:0/12:0	1 day, 13:00:00	761.593	C42 H84 O8 N1 P1	11.095	1.041	0.23	1921000	337731	3.50427e+06	1.58327e+06	1999000	960819	3.03718e+06	82.419	51.935	1.03818e+06
PE(25:0p)	PE	25:0p	25:0p	577.411	C30 H60 O7 N1 P1	11.703	0.975	0.528	5009	2970.09	7047.91	2038.91	4883	3563.08	6202.92	40.705	27.031	1319.92
PE(25:1)	PE	1 day, 1:01:00	1 day, 1:01:00	591.39	C30 H58 O8 N1 P1	7.871	1.174	0.707	7007	4818.36	9195.64	2188.64	8229	6975.39	9482.61	31.235	15.234	1253.61
PE(25:1)	PE	1 day, 1:01:00	1 day, 1:01:00	591.39	C30 H58 O8 N1 P1	6.431	1.467	0	3336	3270.81	3401.19	65.1854	4894	3223.78	6564.22	1.954	34.128	1670.22
PE(25:1/22:0)	PE	25:1/22:0	1 day, 23:01:00	899.734	C52 H102 O8 N1 P1	11.961	23.499	0.197	144900	67058.3	222742	77841.7	3406000	3406000	3406000	53.721	0	0
PE(25:1/9:0)	PE	25:1/9:0	1 day, 10:01:00	717.531	C39 H76 O8 N1 P1	10.573	2.198	0	1848000	294885	3.40111e+06	1.55311e+06	4061000	2.11428e+06	6.00772e+06	84.043	47.937	1.94672e+06
PE(25:2)	PE	1 day, 1:02:00	1 day, 1:02:00	589.374	C30 H56 O8 N1 P1	5.964	54.293	0.227	228400	110093	346707	118307	12400000	9726064	15073936	51.798	21.564	2673936
PE(25:2/14:1)	PE	25:2/14:1	1 day, 15:03:00	783.578	C44 H82 O8 N1 P1	9.402	0.759	0.753	5032000	1.04167e+06	9.02233e+06	3.99033e+06	3822000	854064	6.78994e+06	79.299	77.654	2.96794e+06
PE(25:2/9:0)	PE	25:2/9:0	1 day, 10:02:00	715.515	C39 H74 O8 N1 P1	11.741	1.911	0.256	662400	129671	1.19513e+06	532729	1266000	764613	1.76739e+06	80.424	39.604	501387
PE(25:2e)	PE	25:2e	25:2e	575.395	C30 H58 O7 N1 P1	6.873	0.594	0.515	5541	2866.3	8215.7	2674.7	3291	928.885	5653.12	48.271	71.775	2362.12
PE(25:3/18:1)	PE	25:3/18:1	1 day, 19:04:00	837.625	C48 H88 O8 N1 P1	12.132	0.006	0	457900	457900	457900	0	2790	-2378.5	7958.5	0	185.251	5168.5
PE(25:3/8:0)	PE	25:3/8:0	1 day, 9:03:00	699.484	C38 H70 O8 N1 P1	10.266	0.639	0.048	1973000	1.08937e+06	2.85663e+06	883628	1260000	384287	2.13571e+06	44.786	69.501	875713
PE(25:3/8:0)	PE	25:3/8:0	1 day, 9:03:00	699.484	C38 H70 O8 N1 P1	10.822	0.588	0.866	23460000	1.61881e+07	3.07319e+07	7.2719e+06	13790000	8.50898e+06	1.9071e+07	30.997	38.296	5.28102e+06
PE(25:3e)	PE	25:3e	25:3e	573.379	C30 H56 O7 N1 P1	8.276	3.351	0.237	134700	17775	251625	116925	451400	451400	451400	86.804	0	0
PE(25:5)	PE	1 day, 1:05:00	1 day, 1:05:00	583.327	C30 H50 O8 N1 P1	8.259	138.288	0.235	132200	37889.8	226510	94310.2	18280000	18280000	18280000	71.339	0	0
PE(25:5/16:0)	PE	25:5/16:0	1 day, 17:05:00	807.578	C46 H82 O8 N1 P1	12.048	0.973	0	4438	1859.79	7016.21	2578.21	4320	4320	4320	58.094	0	0
PE(26:0)	PE	1 day, 2:00:00	1 day, 2:00:00	607.421	C31 H62 O8 N1 P1	1.245	52.886	0.38	4710	461.015	8958.99	4248.99	249100	249100	249100	90.212	0	0
PE(26:1)	PE	1 day, 2:01:00	1 day, 2:01:00	605.406	C31 H60 O8 N1 P1	6.286	83.865	0.218	6189	3183.44	9194.56	3005.56	519100	193069	845131	48.563	62.807	326031
PE(26:1p)	PE	26:1p	26:1p	589.411	C31 H60 O7 N1 P1	9.767	1.079	0.493	1088000	328141	1.84786e+06	759859	1174000	1.05026e+06	1.29774e+06	69.84	10.54	123740
PE(26:1p)	PE	26:1p	26:1p	589.411	C31 H60 O7 N1 P1	9.218	0.633	0.592	5331000	1.6371e+06	9.0249e+06	3.6939e+06	3374000	3374000	3374000	69.291	0	0
PE(26:1p)	PE	26:1p	26:1p	589.411	C31 H60 O7 N1 P1	9.66	11.463	0.218	3749000	2.4454e+06	5.0526e+06	1.3036e+06	42970000	8.97772e+06	7.69623e+07	34.772	79.107	3.39923e+07
PE(26:2)	PE	1 day, 2:02:00	1 day, 2:02:00	603.39	C31 H58 O8 N1 P1	10.639	1.691	0.005	2139000	1.61193e+06	2.66607e+06	527071	3616000	1.45417e+06	5.77783e+06	24.641	59.785	2.16183e+06
PE(26:2/19:2)	PE	26:2/19:2	1 day, 21:04:00	865.656	C50 H92 O8 N1 P1	12.232	81.651	0.013	8523	-1349.7	18395.7	9872.7	695900	695900	695900	115.836	0	0
PE(26:2/22:1)	PE	26:2/22:1	2 days, 0:03:00	909.719	C53 H100 O8 N1 P1	3.799	2.246	0.286	64770	12100.3	117440	52669.7	145500	26373.3	264627	81.318	81.874	119127
PE(26:2e)	PE	26:2e	26:2e	589.411	C31 H60 O7 N1 P1	5.959	1.068	0.755	18350000	14773218	21926782	3576782	19590000	19590000	19590000	19.492	0	0
PE(26:2e)	PE	26:2e	26:2e	589.411	C31 H60 O7 N1 P1	12.557	1.6	0.238	9746000	9.4852e+06	1.00068e+07	260803	15590000	4.48587e+06	2.66941e+07	2.676	71.226	1.11041e+07
PE(26:2e)	PE	26:2e	26:2e	589.411	C31 H60 O7 N1 P1	9.484	1.672	0.054	1465000	652291	2.27771e+06	812709	2449000	1.24456e+06	3.65344e+06	55.475	49.181	1.20444e+06
PE(26:3)	PE	1 day, 2:03:00	1 day, 2:03:00	601.374	C31 H56 O8 N1 P1	11.726	1.069	0.323	11300	3812.51	18787.5	7487.49	12070	12070	12070	66.261	0	0
PE(26:3/19:4)	PE	26:3/19:4	1 day, 21:07:00	859.609	C50 H86 O8 N1 P1	12.073	1.244	1	80140	19885.9	140394	60254.1	99700	88329.2	111071	75.186	11.405	11370.8
PE(26:3/20:0)	PE	26:3/20:0	1 day, 22:03:00	881.687	C51 H96 O8 N1 P1	7.12	2.145	0.073	174200	125736	222664	48464.2	373700	64325	683075	27.821	82.787	309375
PE(26:4/13:0)	PE	26:4/13:0	1 day, 15:04:00	781.562	C44 H80 O8 N1 P1	11.839	0.911	0.118	2498000	1.44837e+06	3.54763e+06	1.04963e+06	2276000	1.0722e+06	3.4798e+06	42.019	52.891	1.2038e+06
PE(26:5)	PE	1 day, 2:05:00	1 day, 2:05:00	597.343	C31 H52 O8 N1 P1	6.368	0.788	0.725	2056000	605451	3.50655e+06	1.45055e+06	1619000	1.28897e+06	1.94903e+06	70.552	20.385	330033
PE(26:5/18:2)	PE	26:5/18:2	1 day, 20:07:00	845.593	C49 H84 O8 N1 P1	12.553	0.732	0.149	8051	5030.67	11071.3	3020.33	5890	5890	5890	37.515	0	0
PE(26:6)	PE	1 day, 2:06:00	1 day, 2:06:00	595.327	C31 H50 O8 N1 P1	11.202	0.369	0	3163	1115.53	5210.47	2047.47	1166	980.653	1351.35	64.732	15.896	185.347
PE(27:0e)	PE	27:0e	27:0e	607.458	C32 H66 O7 N1 P1	6.882	2.531	0.031	533600	420552	646648	113048	1351000	1.29264e+06	1.40936e+06	21.186	4.32	58363.2
PE(27:1/10:0)	PE	27:1/10:0	1 day, 13:01:00	759.578	C42 H82 O8 N1 P1	7.607	2.0952e+06	0.363	1	1	1	0	2095000	1.52503e+06	2.66497e+06	0	27.206	569966
PE(27:1/18:1)	PE	27:1/18:1	1 day, 21:02:00	869.687	C50 H96 O8 N1 P1	12.183	40384	0	1	1	1	0	40380	8520.58	72239.4	0	78.899	31859.4
PE(27:1p)	PE	27:1p	27:1p	603.426	C32 H62 O7 N1 P1	10.635	1.338	0.001	2119000	1.20957e+06	3.02843e+06	909432	2834000	639577	5.02842e+06	42.918	77.432	2.19442e+06
PE(27:2)	PE	1 day, 3:02:00	1 day, 3:02:00	617.406	C32 H60 O8 N1 P1	11.465	2.137	0.005	5898	3770.24	8025.76	2127.76	12600	2714.29	22485.7	36.076	78.458	9885.71
PE(27:2/23:5)	PE	27:2/23:5	2 days, 2:07:00	929.687	C55 H96 O8 N1 P1	12.519	1.081	0.193	11210	4642.17	17777.8	6567.83	12110	12110	12110	58.589	0	0
PE(27:4/21:3)	PE	27:4/21:3	2 days, 0:07:00	901.656	C53 H92 O8 N1 P1	12.106	3.32487e+06	0	1	1	1	0	3325000	709322	5.94068e+06	0	78.667	2.61568e+06
PE(27:5/21:4)	PE	27:5/21:4	2 days, 0:09:00	897.625	C53 H88 O8 N1 P1	8.561	4.891	0.029	57530	11034.3	104026	46495.7	281400	66379.4	496421	80.82	76.411	215021
PE(27:5/9:0)	PE	27:5/9:0	1 day, 12:05:00	737.5	C41 H72 O8 N1 P1	11.726	733488	0	1	1	1	0	733500	660319	806681	0	9.977	73181.3
PE(27:6)	PE	1 day, 3:06:00	1 day, 3:06:00	609.343	C32 H52 O8 N1 P1	6.258	2.808	0.123	2722	1878.51	3565.49	843.493	7643	3996.6	11289.4	30.988	47.709	3646.4
PE(28:0/18:1)	PE	28:0/18:1	1 day, 22:01:00	885.719	C51 H100 O8 N1 P1	12.623	1.278	0.717	209000	70002.5	347998	138998	267100	138085	396115	66.506	48.302	129015
PE(28:1)	PE	1 day, 4:01:00	1 day, 4:01:00	633.437	C33 H64 O8 N1 P1	6.772	0.963	0.906	4501000	1.86611e+06	7.13589e+06	2.63489e+06	4335000	2.87467e+06	5.79533e+06	58.54	33.687	1.46033e+06
PE(28:1)	PE	1 day, 4:01:00	1 day, 4:01:00	633.437	C33 H64 O8 N1 P1	11.015	0.891	0.66	6279000	2.89958e+06	9.65842e+06	3.37942e+06	5591000	5591000	5591000	53.821	0	0
PE(28:1)	PE	1 day, 4:01:00	1 day, 4:01:00	633.437	C33 H64 O8 N1 P1	10.815	0.517	0.312	3211000	878273	5.54373e+06	2.33273e+06	1661000	582529	2.73947e+06	72.648	64.929	1.07847e+06
PE(28:1)	PE	1 day, 4:01:00	1 day, 4:01:00	633.437	C33 H64 O8 N1 P1	9.426	1.753	0.577	1677000	967193	2.38681e+06	709807	2941000	1.49967e+06	4.38233e+06	42.326	49.008	1.44133e+06
PE(28:1/13:1)	PE	28:1/13:1	1 day, 17:02:00	813.625	C46 H88 O8 N1 P1	12.705	0.96	0.514	197000	43202.1	350798	153798	189200	159919	218481	78.07	15.476	29280.6
PE(28:1/18:1)	PE	28:1/18:1	1 day, 22:02:00	883.703	C51 H98 O8 N1 P1	11.939	1.695	0.827	1203000	576514	1.82949e+06	626486	2039000	1.58701e+06	2.49099e+06	52.077	22.167	451985
PE(28:2/19:0)	PE	28:2/19:0	1 day, 23:02:00	897.719	C52 H100 O8 N1 P1	11.964	0.525	0.665	400900	226757	575043	174143	210500	142666	278334	43.438	32.225	67833.6
PE(28:2/20:0)	PE	28:2/20:0	2 days, 0:02:00	911.734	C53 H102 O8 N1 P1	12.921	0.01	0	365100	365100	365100	0	3650	-6662.82	13962.8	0	282.543	10312.8
PE(28:2p)	PE	28:2p	28:2p	615.426	C33 H62 O7 N1 P1	12.049	1.659	0	2427	1200.15	3653.85	1226.85	4025	1636.04	6413.96	50.55	59.353	2388.96
PE(28:4)	PE	1 day, 4:04:00	1 day, 4:04:00	627.39	C33 H58 O8 N1 P1	10.547	1.189	0.345	63660	24401.5	102918	39258.5	75670	45645.7	105694	61.669	39.678	30024.3
PE(28:4)	PE	1 day, 4:04:00	1 day, 4:04:00	627.39	C33 H58 O8 N1 P1	9.598	0.731	0.452	20450	6405.76	34494.2	14044.2	14940	10691.1	19188.9	68.676	28.44	4248.94
PE(28:4/10:0)	PE	28:4/10:0	1 day, 14:04:00	767.547	C43 H78 O8 N1 P1	13.601	1.775	0.003	520100	135767	904433	384333	923200	243208	1.60319e+06	73.896	73.656	679992
PE(28:4p)	PE	28:4p	28:4p	611.395	C33 H58 O7 N1 P1	12.568	1.03	0.998	5318	2102.63	8533.37	3215.37	5479	2870.01	8087.99	60.462	47.618	2608.99
PE(28:5/20:3)	PE	28:5/20:3	2 days, 0:08:00	899.64	C53 H90 O8 N1 P1	13.057	0.006	0	241500	241500	241500	0	1556	-880.68	3992.68	0	156.599	2436.68
PE(28:6/9:0)	PE	28:6/9:0	1 day, 13:06:00	749.5	C42 H72 O8 N1 P1	7.968	68.37	0.235	5560	3320.49	7799.51	2239.51	380200	192678	567722	40.279	49.322	187522
PE(29:0)	PE	1 day, 5:00:00	1 day, 5:00:00	649.468	C34 H68 O8 N1 P1	7.272	119.999	0.245	4590	1533.93	7646.07	3056.07	550700	550700	550700	66.581	0	0
PE(29:0e)	PE	29:0e	29:0e	635.489	C34 H70 O7 N1 P1	6.785	1.703	0.177	228600	176205	280995	52395.1	389400	363653	415147	22.92	6.612	25747.1
PE(29:0p)	PE	29:0p	29:0p	633.473	C34 H68 O7 N1 P1	7.763	14.122	0.197	766800	36407.7	1.49719e+06	730392	10830000	9.51925e+06	1.21408e+07	95.252	12.103	1.31075e+06
PE(29:0p)	PE	29:0p	29:0p	633.473	C34 H68 O7 N1 P1	9.74	1.332	0.434	1537000	335174	2.73883e+06	1.20183e+06	2047000	426226	3.66777e+06	78.193	79.178	1.62077e+06
PE(29:1e)	PE	29:1e	29:1e	633.473	C34 H68 O7 N1 P1	10.607	0.902	0.328	2392000	1.25185e+06	3.53215e+06	1.14015e+06	2157000	1.23678e+06	3.07722e+06	47.665	42.662	920219
PE(29:1e)	PE	29:1e	29:1e	633.473	C34 H68 O7 N1 P1	12.151	1.073	0.46	5818000	5.23003e+06	6.40597e+06	587967	6240000	6.17111e+06	6.30889e+06	10.106	1.104	68889.6
PE(29:1e)	PE	29:1e	29:1e	633.473	C34 H68 O7 N1 P1	9.896	1.7	0.193	1007000	376225	1.63777e+06	630775	1711000	999926	2.42207e+06	62.639	41.559	711074
PE(29:2)	PE	1 day, 5:02:00	1 day, 5:02:00	645.437	C34 H64 O8 N1 P1	8.903	0.422	0.211	15670	2997.98	28342	12672	6612	4183.54	9040.46	80.868	36.728	2428.46
PE(29:3/19:2)	PE	29:3/19:2	2 days, 0:05:00	905.687	C53 H96 O8 N1 P1	9.676	283.762	0.422	4049	2312.18	5785.82	1736.82	1149000	327476	1.97052e+06	42.895	71.499	821524
PE(29:3/19:3)	PE	29:3/19:3	2 days, 0:06:00	903.672	C53 H94 O8 N1 P1	12.082	299.325	0.133	4340	2313.96	6366.04	2026.04	1299000	213517	2.38448e+06	46.683	83.563	1.08548e+06
PE(29:3/22:4)	PE	29:3/22:4	2 days, 3:07:00	943.703	C56 H98 O8 N1 P1	12.094	1.549	0.601	4233	3419.71	5046.29	813.286	6557	6557	6557	19.213	0	0
PE(29:3p)	PE	29:3p	29:3p	627.426	C34 H62 O7 N1 P1	12.152	1.008	0.276	16410000	16090005	16729995	319995	16540000	1.26584e+07	2.04216e+07	1.95	23.468	3.88161e+06
PE(29:3p)	PE	29:3p	29:3p	627.426	C34 H62 O7 N1 P1	5.893	1.047	0.954	14630000	1.21975e+07	1.70625e+07	2.43253e+06	15320000	5.55564e+06	2.50844e+07	16.627	63.736	9.76436e+06
PE(29:3p)	PE	29:3p	29:3p	627.426	C34 H62 O7 N1 P1	10.555	0.68	0.166	3211000	1.63401e+06	4.78799e+06	1.57699e+06	2182000	2182000	2182000	49.112	0	0
PE(29:4e)	PE	29:4e	29:4e	627.426	C34 H62 O7 N1 P1	9.015	0.859	0.39	2271000	1.19384e+06	3.34816e+06	1.07716e+06	1950000	1950000	1950000	47.431	0	0
PE(29:4e)	PE	29:4e	29:4e	627.426	C34 H62 O7 N1 P1	5.888	0.873	0.948	16200000	13491846	18908154	2708154	14140000	14140000	14140000	16.717	0	0
PE(29:4e)	PE	29:4e	29:4e	627.426	C34 H62 O7 N1 P1	11.582	1.025	0.072	7631000	7.49044e+06	7.77156e+06	140563	7818000	7818000	7818000	1.842	0	0
PE(29:4e)	PE	29:4e	29:4e	627.426	C34 H62 O7 N1 P1	9.555	1.808	0.787	1626000	863634	2.38837e+06	762366	2941000	2941000	2941000	46.886	0	0
PE(29:5)	PE	1 day, 5:05:00	1 day, 5:05:00	639.39	C34 H58 O8 N1 P1	11.627	2018.49	0	2890	1654.21	4125.79	1235.79	5834000	4.51015e+06	7.15785e+06	42.761	22.692	1.32385e+06
PE(29:5)	PE	1 day, 5:05:00	1 day, 5:05:00	639.39	C34 H58 O8 N1 P1	5.825	2600.48	0.025	3456	1384.58	5527.42	2071.42	8988000	1.45282e+06	1.65232e+07	59.937	83.836	7.53518e+06
PE(29:5/18:3)	PE	29:5/18:3	1 day, 23:08:00	885.625	C52 H88 O8 N1 P1	12.115	4.71998e+06	0	1	1	1	0	4720000	735659	8.70434e+06	0	84.414	3.98434e+06
PE(29:5p)	PE	29:5p	29:5p	623.395	C34 H58 O7 N1 P1	10.006	1.003	0.349	293900	264874	322926	29025.6	294900	169886	419914	9.876	42.392	125014
PE(29:6/16:1)	PE	29:6/16:1	1 day, 21:07:00	859.609	C50 H86 O8 N1 P1	9.823	6.058	0.01	113100	39726.4	186474	73373.6	685200	685200	685200	64.875	0	0
PE(29:6/18:1)	PE	29:6/18:1	1 day, 23:07:00	887.64	C52 H90 O8 N1 P1	12.277	3.007	0	697000	697000	697000	0	2096000	547098	3.6449e+06	0	73.898	1.5489e+06
PE(30:0/18:1)	PE	30:0/18:1	2 days, 0:01:00	913.75	C53 H104 O8 N1 P1	12.235	4.972	0.147	360100	133237	586963	226863	1790000	322934	3.25707e+06	63	81.959	1.46707e+06
PE(30:1/19:4)	PE	30:1/19:4	2 days, 1:05:00	919.703	C54 H98 O8 N1 P1	11.891	25.454	0.229	32030	19789.1	44270.9	12240.9	815300	357534	1.27307e+06	38.217	56.147	457766
PE(30:1p)	PE	30:1p	30:1p	645.473	C35 H68 O7 N1 P1	11.55	0.746	0.911	132400	42219.7	222580	90180.3	98760	58295.1	139225	68.112	40.973	40464.9
PE(30:3p)	PE	30:3p	30:3p	641.442	C35 H64 O7 N1 P1	11.838	2.032	0.63	3829	1098.08	6559.92	2730.92	7778	6737.85	8818.15	71.322	13.373	1040.15
PE(30:4p)	PE	30:4p	30:4p	639.426	C35 H62 O7 N1 P1	7.727	2118.83	0.23	3737	-3404	10878	7141	7918000	5.50855e+06	1.03274e+07	191.089	30.43	2.40945e+06
PE(30:5/17:2)	PE	30:5/17:2	1 day, 23:07:00	887.64	C52 H90 O8 N1 P1	12.843	0.737	0.67	16190	6032.39	26347.6	10157.6	11940	8960.49	14919.5	62.74	24.954	2979.51
PE(30:6/13:1)	PE	30:6/13:1	1 day, 19:07:00	831.578	C48 H82 O8 N1 P1	11.427	0.691	0.411	4086000	2.43379e+06	5.73821e+06	1.65221e+06	2824000	2824000	2824000	40.436	0	0
PE(30:6p)	PE	30:6p	30:6p	635.395	C35 H58 O7 N1 P1	7.78	81.737	0.102	5027	2650.44	7403.56	2376.56	410900	157473	664327	47.276	61.676	253427
PE(30:7)	PE	1 day, 6:07:00	1 day, 6:07:00	649.374	C35 H56 O8 N1 P1	8.191	1.227	0.218	45790	11000.6	80579.4	34789.4	56200	22608.1	89791.9	75.976	59.772	33591.9
PE(31:0)	PE	1 day, 7:00:00	1 day, 7:00:00	677.5	C36 H72 O8 N1 P1	11.905	1.095	0.595	9024000	6.22494e+06	1.18231e+07	2.79906e+06	9883000	1.5375e+06	1.82285e+07	31.018	84.443	8.3455e+06
PE(31:0)	PE	1 day, 7:00:00	1 day, 7:00:00	677.5	C36 H72 O8 N1 P1	9.834	0.932	0.915	968500	505877	1.43112e+06	462623	903000	487485	1.31852e+06	47.767	46.015	415515
PE(31:0)	PE	1 day, 7:00:00	1 day, 7:00:00	677.5	C36 H72 O8 N1 P1	9.328	0.656	0.979	2432000	661893	4.20211e+06	1.77011e+06	1595000	733429	2.45657e+06	72.784	54.017	861571
PE(31:0/16:2)	PE	31:0/16:2	1 day, 23:02:00	897.719	C52 H100 O8 N1 P1	13.174	152.207	0	2747	2074.26	3419.74	672.74	418100	211847	624353	24.49	49.331	206253
PE(31:0/18:0)	PE	31:0/18:0	2 days, 1:00:00	929.781	C54 H108 O8 N1 P1	12.232	423.324	0.237	3650	1168.11	6131.89	2481.89	1545000	1545000	1545000	67.997	0	0
PE(31:0/18:0)	PE	31:0/18:0	2 days, 1:00:00	929.781	C54 H108 O8 N1 P1	13.166	0.82	0.972	443000	312900	573100	130100	363400	76361.2	650439	29.368	78.987	287039
PE(31:0p)	PE	31:0p	31:0p	661.505	C36 H72 O7 N1 P1	8.106	0.527	0.353	17770	4604.38	30935.6	13165.6	9364	7363.01	11365	74.089	21.369	2000.99
PE(31:3)	PE	1 day, 7:03:00	1 day, 7:03:00	671.453	C36 H66 O8 N1 P1	9.815	1.078	0.605	1033000	411640	1.65436e+06	621360	1113000	579873	1646127	60.151	47.9	533127
PE(31:3)	PE	1 day, 7:03:00	1 day, 7:03:00	671.453	C36 H66 O8 N1 P1	9.414	0.517	0.259	1935000	705869	3.16413e+06	1.22913e+06	1001000	653713	1.34829e+06	63.521	34.694	347287
PE(31:3)	PE	1 day, 7:03:00	1 day, 7:03:00	671.453	C36 H66 O8 N1 P1	7.158	0.579	0.072	421900	183016	660784	238884	244100	244100	244100	56.621	0	0
PE(31:3/20:1)	PE	31:3/20:1	2 days, 3:04:00	949.75	C56 H104 O8 N1 P1	11.872	1.198	0.049	1027000	946678	1.10732e+06	80321.7	1230000	1230000	1230000	7.821	0	0
PE(31:3/9:0)	PE	31:3/9:0	1 day, 16:03:00	797.593	C45 H84 O8 N1 P1	6.043	1.237	0.892	148500	64008	232992	84492	183700	76472.5	290928	56.897	58.371	107228
PE(31:3p)	PE	31:3p	31:3p	655.458	C36 H66 O7 N1 P1	6.572	2.794	0.082	378100	73729.5	682470	304370	1057000	403806	1.71019e+06	80.5	61.797	653194
PE(31:3p)	PE	31:3p	31:3p	655.458	C36 H66 O7 N1 P1	12.606	4.047	0.204	3165000	2.33042e+06	3.99958e+06	834579	12810000	6.38848e+06	1.92315e+07	26.369	50.129	6.42152e+06
PE(31:4/13:1)	PE	31:4/13:1	1 day, 20:05:00	849.625	C49 H88 O8 N1 P1	11.742	0.502	0.473	2449000	1.41489e+06	3.48311e+06	1.03411e+06	1230000	1230000	1230000	42.226	0	0
PE(31:4/16:0)	PE	31:4/16:0	1 day, 23:04:00	893.687	C52 H96 O8 N1 P1	9.762	2.64	0.001	97770	15041.9	180498	82728.1	258100	258100	258100	84.615	0	0
PE(31:4/19:5)	PE	31:4/19:5	2 days, 2:09:00	925.656	C55 H92 O8 N1 P1	9.764	39.524	0.136	10300	2998.23	17601.8	7301.77	407100	383749	430451	70.891	5.736	23351.3
PE(31:4e)	PE	31:4e	31:4e	655.458	C36 H66 O7 N1 P1	12.209	0.96	0.538	3296000	2.31715e+06	4.27485e+06	978846	3165000	1.16646e+06	5.16354e+06	29.698	63.145	1.99854e+06
PE(31:5p)	PE	31:5p	31:5p	651.426	C36 H62 O7 N1 P1	6.786	0.831	0.723	5055	2504.85	7605.15	2550.15	4200	3908.56	4491.44	50.448	6.939	291.438
PE(31:6p)	PE	31:6p	31:6p	649.411	C36 H60 O7 N1 P1	10.817	0.466	0.91	2514000	897347	4.13065e+06	1.61665e+06	1171000	487277	1.85472e+06	64.306	58.388	683723
PE(32:0e)	PE	32:0e	32:0e	677.536	C37 H76 O7 N1 P1	9.375	0.764	0.972	192200	106490	277910	85709.7	146900	69561.6	224238	44.594	52.647	77338.4
PE(32:0e)	PE	32:0e	32:0e	677.536	C37 H76 O7 N1 P1	8.913	2.532	0.166	2024000	460237	3.58776e+06	1.56376e+06	5124000	5124000	5124000	77.261	0	0
PE(32:2/16:2)	PE	32:2/16:2	2 days, 0:04:00	907.703	C53 H98 O8 N1 P1	11.889	787860	0	1	1	1	0	787900	458660	1.11714e+06	0	41.787	329240
PE(32:2p)	PE	32:2p	32:2p	671.489	C37 H70 O7 N1 P1	8.278	6.831	0.039	2433000	811819	4.05418e+06	1.62118e+06	16620000	16620000	16620000	66.633	0	0
PE(32:2p)	PE	32:2p	32:2p	671.489	C37 H70 O7 N1 P1	8.726	1.169	0.545	32100000	9556491	54643509	22543509	37520000	1.64792e+07	5.85608e+07	70.229	56.079	2.10408e+07
PE(32:2p)	PE	32:2p	32:2p	671.489	C37 H70 O7 N1 P1	12.297	1.174	0.321	4587000	3.57818e+06	5.59582e+06	1.00882e+06	5386000	2.51095e+06	8.26105e+06	21.993	53.38	2.87505e+06
PE(32:3e)	PE	32:3e	32:3e	671.489	C37 H70 O7 N1 P1	11.645	1.008	0.215	11360000	7393656	15326344	3966344	11450000	1.0386e+07	1.2514e+07	34.915	9.293	1.06405e+06
PE(32:4)	PE	1 day, 8:04:00	1 day, 8:04:00	683.453	C37 H66 O8 N1 P1	10.232	84.323	0	4537	1511.59	7562.41	3025.41	382600	382600	382600	66.683	0	0
PE(32:4/18:3)	PE	32:4/18:3	2 days, 2:07:00	929.687	C55 H96 O8 N1 P1	12.222	14.862	0.24	106500	5786.15	207214	100714	1583000	981887	2.18411e+06	94.567	37.973	601113
PE(32:4/9:0)	PE	32:4/9:0	1 day, 17:04:00	809.593	C46 H84 O8 N1 P1	5.631	0.882	0.93	540800	369274	712326	171526	477100	203455	750745	31.717	57.356	273645
PE(32:5)	PE	1 day, 8:05:00	1 day, 8:05:00	681.437	C37 H64 O8 N1 P1	11.4	1.182	0	3761	3761	3761	0	4446	2130.7	6761.3	0	52.076	2315.3
PE(32:6p)	PE	32:6p	32:6p	663.426	C37 H62 O7 N1 P1	5.235	0.86	0.988	140000	70268.8	209731	69731.2	120400	120400	120400	49.808	0	0
PE(32:7)	PE	1 day, 8:07:00	1 day, 8:07:00	677.406	C37 H60 O8 N1 P1	8.103	543.879	0.23	5608	4370.26	6845.74	1237.74	3050000	1.69266e+06	4.40734e+06	22.071	44.503	1.35734e+06
PE(33:2)	PE	1 day, 9:02:00	1 day, 9:02:00	701.5	C38 H72 O8 N1 P1	1.248	1.243	0.44	216000	36290.2	395710	179710	268500	126474	410526	83.199	52.896	142026
PE(33:2)	PE	1 day, 9:02:00	1 day, 9:02:00	701.5	C38 H72 O8 N1 P1	12.53	1.47	0.458	36210	14518	57902	21692	53210	44461.7	61958.3	59.906	16.441	8748.26
PE(33:3p)	PE	33:3p	33:3p	683.489	C38 H70 O7 N1 P1	5.757	0.761	0.958	5166000	3.51815e+06	6.81385e+06	1.64785e+06	3929000	2.34593e+06	5.51207e+06	31.898	40.292	1.58307e+06
PE(33:3p)	PE	33:3p	33:3p	683.489	C38 H70 O7 N1 P1	10.045	1.56	0.591	1572000	563593	2.58041e+06	1.00841e+06	2453000	1.24419e+06	3.66181e+06	64.148	49.279	1.20881e+06
PE(33:5/13:1)	PE	33:5/13:1	1 day, 22:06:00	875.64	C51 H90 O8 N1 P1	1.1	8.817	0.508	14650	5823.52	23476.5	8826.48	129200	129200	129200	60.249	0	0
PE(33:5/19:4)	PE	33:5/19:4	2 days, 4:09:00	953.687	C57 H96 O8 N1 P1	12.163	0.837	0.933	6061	3708.73	8413.27	2352.27	5073	1228.17	8917.83	38.81	75.79	3844.83
PE(33:6)	PE	1 day, 9:06:00	1 day, 9:06:00	693.437	C38 H64 O8 N1 P1	8.114	23.953	0.252	11050	2623.05	19477	8426.95	264700	264700	264700	76.262	0	0
PE(33:6p)	PE	33:6p	33:6p	677.442	C38 H64 O7 N1 P1	12.222	0.986	0.441	4527000	3.0943e+06	5.9597e+06	1.4327e+06	4465000	4465000	4465000	31.648	0	0
PE(33:6p)	PE	33:6p	33:6p	677.442	C38 H64 O7 N1 P1	11.824	1.419	0.875	4146000	2.93682e+06	5.35518e+06	1.20918e+06	5881000	4.39011e+06	7.37189e+06	29.165	25.351	1.49089e+06
PE(34:0/8:0)	PE	34:0/8:0	1 day, 18:00:00	831.672	C47 H94 O8 N1 P1	12.456	1.041	0.465	2665000	1.7767e+06	3.5533e+06	888298	2775000	1.01526e+06	4.53474e+06	33.332	63.414	1.75974e+06
PE(34:0p)	PE	34:0p	34:0p	703.552	C39 H78 O7 N1 P1	10.808	0.78	0.979	3531000	1.66229e+06	5.39971e+06	1.86871e+06	2754000	2754000	2754000	52.923	0	0
PE(34:2/20:3)	PE	34:2/20:3	2 days, 6:05:00	989.781	C59 H108 O8 N1 P1	8.817	1.066	0.621	518800	471309	566291	47491	553100	260211	845989	9.154	52.954	292889
PE(34:2p)	PE	34:2p	34:2p	699.52	C39 H74 O7 N1 P1	8.88	0.777	0.946	2092000	582496	3.6015e+06	1.5095e+06	1626000	1626000	1626000	72.156	0	0
PE(34:2p)	PE	34:2p	34:2p	699.52	C39 H74 O7 N1 P1	10.819	1.118	0.055	11620000	9.45717e+06	1.37828e+07	2.16283e+06	13000000	13000000	13000000	18.613	0	0
PE(34:3e)	PE	34:3e	34:3e	699.52	C39 H74 O7 N1 P1	10.814	1.159	0.024	11620000	9.35689e+06	1.38831e+07	2.26311e+06	13470000	13470000	13470000	19.476	0	0
PE(34:4p)	PE	34:4p	34:4p	695.489	C39 H70 O7 N1 P1	10.586	993.222	0	1634	1491.5	1776.5	142.501	1623000	1623000	1623000	8.721	0	0
PE(35:0)	PE	1 day, 11:00:00	1 day, 11:00:00	733.562	C40 H80 O8 N1 P1	10.857	2.23	0.003	2325000	493690	4.15631e+06	1.83131e+06	5184000	5.00489e+06	5.36311e+06	78.766	3.455	179107
PE(35:0/10:0)	PE	35:0/10:0	1 day, 21:00:00	873.719	C50 H100 O8 N1 P1	12.745	1.145	0.441	1047000	403231	1.69077e+06	643769	1198000	1.03891e+06	1.35709e+06	61.487	13.28	159094
PE(35:0/12:0)	PE	35:0/12:0	1 day, 23:00:00	901.75	C52 H104 O8 N1 P1	12.183	1.78	0.321	37560	7930.79	67189.2	29629.2	66840	14619.9	119060	78.885	78.127	52220.1
PE(35:1p)	PE	35:1p	35:1p	715.552	C40 H78 O7 N1 P1	10.812	50.558	0.197	218000	7335.7	428664	210664	11020000	11020000	11020000	96.635	0	0
PE(35:1p)	PE	35:1p	35:1p	715.552	C40 H78 O7 N1 P1	7.91	2.332	0.356	288700	249010	328390	39690.5	673500	187523	1.15948e+06	13.748	72.157	485977
PE(35:4)	PE	1 day, 11:04:00	1 day, 11:04:00	725.5	C40 H72 O8 N1 P1	6.155	0.656	0.563	420100	132374	707826	287726	275500	77657.9	473342	68.49	71.812	197842
PE(35:4p)	PE	35:4p	35:4p	709.505	C40 H72 O7 N1 P1	11.561	0.005	0	547100	547100	547100	0	2465	-39.6865	4969.69	0	101.61	2504.69
PE(35:5)	PE	1 day, 11:05:00	1 day, 11:05:00	723.484	C40 H70 O8 N1 P1	7.643	40.623	0.245	8133	3500.36	12765.6	4632.64	330400	305372	355428	56.961	7.575	25027.8
PE(36:2)	PE	1 day, 12:02:00	1 day, 12:02:00	743.547	C41 H78 O8 N1 P1	9.319	0.823	0.944	882400	335409	1.42939e+06	546991	726200	122321	1.33008e+06	61.989	83.156	603879
PE(36:2p)	PE	36:2p	36:2p	727.552	C41 H78 O7 N1 P1	5.673	1.232	0.772	4990000	4.64315e+06	5.33685e+06	346855	6146000	2.60013e+06	9.69187e+06	6.951	57.694	3.54587e+06
PE(36:5)	PE	1 day, 12:05:00	1 day, 12:05:00	737.5	C41 H72 O8 N1 P1	6.094	0.479	0.478	21740	11591.6	31888.4	10148.4	10420	10420	10420	46.681	0	0
PE(36:5/13:1)	PE	36:5/13:1	2 days, 1:06:00	917.687	C54 H96 O8 N1 P1	1.102	0.029	0	996000	996000	996000	0	29360	-32499.2	91219.2	0	210.692	61859.2
PE(36:5p)	PE	36:5p	36:5p	721.505	C41 H72 O7 N1 P1	9.235	1.106	0.924	1100000	278564	1921436	821436	1217000	1.09259e+06	1.34141e+06	74.676	10.223	124414
PE(36:5p)	PE	36:5p	36:5p	721.505	C41 H72 O7 N1 P1	5.763	0.498	0.568	16720000	9.44028e+06	2.39997e+07	7.27972e+06	8333000	8333000	8333000	43.539	0	0
PE(36:6e)	PE	36:6e	36:6e	721.505	C41 H72 O7 N1 P1	9.043	1.094	0.372	1862000	1.1391e+06	2.5849e+06	722903	2037000	912922	3.16108e+06	38.824	55.183	1.12408e+06
PE(36:6e)	PE	36:6e	36:6e	721.505	C41 H72 O7 N1 P1	5.763	0.498	0.568	16720000	9.44028e+06	2.39997e+07	7.27972e+06	8333000	3.25995e+06	1.3406e+07	43.539	60.879	5.07305e+06
PE(37:1/10:0)	PE	37:1/10:0	1 day, 23:01:00	899.734	C52 H102 O8 N1 P1	12.72	1.041	0.356	523600	177108	870092	346492	545300	320909	769691	66.175	41.15	224391
PE(37:3/14:0)	PE	37:3/14:0	2 days, 3:03:00	951.766	C56 H106 O8 N1 P1	12.005	31.808	0.15	17020	4904.82	29135.2	12115.2	541400	495013	587787	71.182	8.568	46387.2
PE(37:5)	PE	1 day, 13:05:00	1 day, 13:05:00	751.515	C42 H74 O8 N1 P1	6.581	1.316	0.056	10760	8041.16	13478.8	2718.84	14150	3067.15	25232.8	25.268	78.324	11082.8
PE(37:6)	PE	1 day, 13:06:00	1 day, 13:06:00	749.5	C42 H72 O8 N1 P1	9.809	300020	0	1	1	1	0	300000	149538	450462	0	50.154	150462
PE(38:1e)	PE	38:1e	38:1e	759.614	C43 H86 O7 N1 P1	11.873	423.785	0.375	5701	4384.01	7017.99	1316.99	2416000	2416000	2416000	23.101	0	0
PE(38:2)	PE	1 day, 14:02:00	1 day, 14:02:00	771.578	C43 H82 O8 N1 P1	5.618	0.932	0.993	3778000	3.17288e+06	4.38312e+06	605122	3520000	1.70463e+06	5.33537e+06	16.017	51.573	1.81537e+06
PE(38:3)	PE	1 day, 14:03:00	1 day, 14:03:00	769.562	C43 H80 O8 N1 P1	9.599	47.432	0.293	15410	8787.4	22032.6	6622.6	730900	730900	730900	42.976	0	0
PE(38:3)	PE	1 day, 14:03:00	1 day, 14:03:00	769.562	C43 H80 O8 N1 P1	8.887	0.242	0	10550	3526.97	17573	7023.03	2555	1792.13	3317.87	66.569	29.858	762.872
PE(38:5)	PE	1 day, 14:05:00	1 day, 14:05:00	765.531	C43 H76 O8 N1 P1	8.934	0.913	0.2	1680000	844116	2515884	835884	1534000	1534000	1534000	49.755	0	0
PE(38:5)	PE	1 day, 14:05:00	1 day, 14:05:00	765.531	C43 H76 O8 N1 P1	6.938	0.629	0.388	6912	1258.47	12565.5	5653.53	4350	1560.61	7139.39	81.793	64.124	2789.39
PE(38:5/12:0)	PE	38:5/12:0	2 days, 2:05:00	933.719	C55 H100 O8 N1 P1	12.497	54.532	0.276	6617	4070.98	9163.02	2546.02	360800	360800	360800	38.477	0	0
PE(38:5/22:0)	PE	38:5/22:0	2 days, 12:05:00	1073.88	C65 H120 O8 N1 P1	8.372	1.142	0.768	1022	798.908	1245.09	223.092	1167	1048.54	1285.46	21.829	10.151	118.462
PE(38:5p)	PE	38:5p	38:5p	749.536	C43 H76 O7 N1 P1	7.965	2.074	0.911	5261	1701.14	8820.86	3559.86	10910	10910	10910	67.665	0	0
PE(38:8)	PE	1 day, 14:08:00	1 day, 14:08:00	759.484	C43 H70 O8 N1 P1	8.917	0.913	0.459	6957000	6.29706e+06	7.61694e+06	659941	6349000	5.11939e+06	7.57861e+06	9.486	19.367	1.22961e+06
PE(39:3)	PE	1 day, 15:03:00	1 day, 15:03:00	783.578	C44 H82 O8 N1 P1	13.604	1.705	0	258200	66269.6	450130	191930	440300	126833	753767	74.334	71.194	313467
PE(39:4)	PE	1 day, 15:04:00	1 day, 15:04:00	781.562	C44 H80 O8 N1 P1	9.795	2.15	0.005	225300	60738.6	389861	164561	484600	484600	484600	73.041	0	0
PE(39:6)	PE	1 day, 15:06:00	1 day, 15:06:00	777.531	C44 H76 O8 N1 P1	3.954	361.944	0	2316	2316	2316	0	838400	318391	1.35841e+06	0	62.024	520009
PE(39:7p)	PE	39:7p	39:7p	759.52	C44 H74 O7 N1 P1	5.692	1.135	0.949	5414000	4.94607e+06	5.88193e+06	467932	6146000	6146000	6146000	8.643	0	0
PE(4:0/13:1)	PE	4:0/13:1	17:01:00	479.265	C22 H42 O8 N1 P1	6.98	33.073	0.21	23360	13429	33291	9931.04	772700	772700	772700	42.513	0	0
PE(4:0/13:1)	PE	4:0/13:1	17:01:00	479.265	C22 H42 O8 N1 P1	6.142	1.047	0.1	22440000	1.45741e+07	3.03059e+07	7.86589e+06	23510000	1.93807e+07	2.76393e+07	35.053	17.564	4.1293e+06
PE(4:0/19:0)	PE	4:0/19:0	23:00:00	565.374	C28 H56 O8 N1 P1	10.673	1.11385e+06	0	1	1	1	0	1114000	753510	1.47449e+06	0	32.36	360490
PE(4:0/21:0)	PE	4:0/21:0	1 day, 1:00:00	593.406	C30 H60 O8 N1 P1	11.689	0.937	0.169	861600	333327	1.38987e+06	528273	807500	418963	1.19604e+06	61.313	48.116	388537
PE(4:0/21:0)	PE	4:0/21:0	1 day, 1:00:00	593.406	C30 H60 O8 N1 P1	10.935	1.094	0.417	6667000	5.99537e+06	7.33863e+06	671634	7294000	7294000	7294000	10.074	0	0
PE(4:0/21:2)	PE	4:0/21:2	1 day, 1:02:00	589.374	C30 H56 O8 N1 P1	12.098	1.106	0.956	12620	3801.9	21438.1	8818.1	13960	12318.9	15601.1	69.874	11.756	1641.14
PE(4:0/22:6)	PE	4:0/22:6	1 day, 2:06:00	595.327	C31 H50 O8 N1 P1	9.032	4.654	0.495	445300	400632	489968	44668	2072000	1.0257e+06	3.1183e+06	10.031	50.497	1.0463e+06
PE(4:0/23:0)	PE	4:0/23:0	1 day, 3:00:00	621.437	C32 H64 O8 N1 P1	11.175	1.012	0.081	11440000	1.09505e+07	1.19295e+07	489518	11580000	1.00715e+07	1.30885e+07	4.279	13.027	1.50853e+06
PE(4:0/23:2)	PE	4:0/23:2	1 day, 3:02:00	617.406	C32 H60 O8 N1 P1	8.981	3.641	0.104	8225	6245.98	10204	1979.02	29940	26293	33587	24.061	12.181	3646.99
PE(4:0/23:5)	PE	4:0/23:5	1 day, 3:05:00	611.359	C32 H54 O8 N1 P1	10.457	1.06067e+06	0	1	1	1	0	1061000	468410	1.65359e+06	0	55.852	592590
PE(4:0/23:5)	PE	4:0/23:5	1 day, 3:05:00	611.359	C32 H54 O8 N1 P1	5.89	1.061	0.522	11650000	7.50668e+06	1.57933e+07	4.14332e+06	12350000	12350000	12350000	35.565	0	0
PE(4:0/24:0)	PE	4:0/24:0	1 day, 4:00:00	635.453	C33 H66 O8 N1 P1	11.763	4.048	0.437	63320	28183.1	98456.9	35136.9	256400	100678	412122	55.491	60.734	155722
PE(40:11)	PE	1 day, 16:11:00	1 day, 16:11:00	781.468	C45 H68 O8 N1 P1	9.809	1.371	0.881	35200	14394.3	56005.7	20805.7	48250	28019.3	68480.7	59.107	41.929	20230.7
PE(40:5)	PE	1 day, 16:05:00	1 day, 16:05:00	793.562	C45 H80 O8 N1 P1	9.556	2.915	0.012	1528000	388876	2667124	1139124	4454000	4454000	4454000	74.55	0	0
PE(40:6)	PE	1 day, 16:06:00	1 day, 16:06:00	791.547	C45 H78 O8 N1 P1	8.915	0.936	0.55	6961000	6.46691e+06	7.45509e+06	494092	6518000	6.33413e+06	6.70187e+06	7.098	2.821	183873
PE(41:10)	PE	1 day, 17:10:00	1 day, 17:10:00	797.5	C46 H72 O8 N1 P1	10.203	0.968	0.148	1368000	590620	2.14538e+06	777380	1325000	1325000	1325000	56.826	0	0
PE(41:5)	PE	1 day, 17:05:00	1 day, 17:05:00	807.578	C46 H82 O8 N1 P1	11.277	1.819	0.146	1019000	732365	1.30563e+06	286635	1853000	1.40352e+06	2.30248e+06	28.129	24.257	449482
PE(41:5)	PE	1 day, 17:05:00	1 day, 17:05:00	807.578	C46 H82 O8 N1 P1	11.534	2.453	0.706	810600	567501	1.0537e+06	243099	1989000	1989000	1989000	29.99	0	0
PE(41:7)	PE	1 day, 17:07:00	1 day, 17:07:00	803.547	C46 H78 O8 N1 P1	5.623	0.979	0.49	3922000	3.45246e+06	4.39154e+06	469542	3838000	3838000	3838000	11.972	0	0
PE(42:1)	PE	1 day, 18:01:00	1 day, 18:01:00	829.656	C47 H92 O8 N1 P1	12.702	4.751	0.259	1530	1159.68	1900.32	370.321	7270	5665.15	8874.85	24.204	22.075	1604.85
PE(42:8)	PE	1 day, 18:08:00	1 day, 18:08:00	815.547	C47 H78 O8 N1 P1	8.686	678.785	0.241	5091	3851.39	6330.61	1239.61	3456000	2.62456e+06	4.28744e+06	24.349	24.058	831444
PE(43:1)	PE	1 day, 19:01:00	1 day, 19:01:00	843.672	C48 H94 O8 N1 P1	11.95	138.569	0.373	4498	1146.45	7849.55	3351.55	623300	517719	728881	74.512	16.939	105581
PE(43:10)	PE	1 day, 19:10:00	1 day, 19:10:00	825.531	C48 H76 O8 N1 P1	7.914	181.593	0.433	2860	-986.099	6706.1	3846.1	519300	334434	704166	134.479	35.599	184866
PE(43:1p)	PE	43:1p	43:1p	827.677	C48 H94 O7 N1 P1	12.349	2.251	0	58030	28466	87594	29564	130600	130600	130600	50.946	0	0
PE(43:6)	PE	1 day, 19:06:00	1 day, 19:06:00	833.593	C48 H84 O8 N1 P1	11.312	8.271	0.017	225800	-31417.8	483018	257218	1867000	1867000	1867000	113.914	0	0
PE(44:3p)	PE	44:3p	44:3p	837.661	C49 H92 O7 N1 P1	12.128	894908	0	1	1	1	0	894900	418366	1.37143e+06	0	53.25	476534
PE(45:5)	PE	1 day, 21:05:00	1 day, 21:05:00	863.64	C50 H90 O8 N1 P1	12.447	1.039	0.658	4840	3743.98	5936.02	1096.02	5030	2148.21	7911.79	22.645	57.292	2881.79
PE(45:5)	PE	1 day, 21:05:00	1 day, 21:05:00	863.64	C50 H90 O8 N1 P1	12.907	1.356	0	2466	2466	2466	0	3343	1682.4	5003.6	0	49.674	1660.6
PE(46:2)	PE	1 day, 22:02:00	1 day, 22:02:00	883.703	C51 H98 O8 N1 P1	12.428	1.178	0.631	20040	4984.95	35095.1	15055	23600	7762.75	39437.3	75.125	67.107	15837.3
PE(46:4)	PE	1 day, 22:04:00	1 day, 22:04:00	879.672	C51 H94 O8 N1 P1	11.916	0.823	0.072	849700	312775	1.38663e+06	536925	699500	624031	774969	63.19	10.789	75469.1
PE(48:6)	PE	2 days, 0:06:00	2 days, 0:06:00	903.672	C53 H94 O8 N1 P1	12.506	1.153	0.018	27180	5270.75	49089.3	21909.3	31330	13819	48841	80.608	55.892	17511
PE(48:7)	PE	2 days, 0:07:00	2 days, 0:07:00	901.656	C53 H92 O8 N1 P1	9.23	521617	0	1	1	1	0	521600	204055	839145	0	60.879	317545
PE(49:7)	PE	2 days, 1:07:00	2 days, 1:07:00	915.672	C54 H94 O8 N1 P1	13.032	0.008	0	262600	262600	262600	0	2185	1128.12	3241.88	0	48.37	1056.88
PE(50:0)	PE	2 days, 2:00:00	2 days, 2:00:00	943.797	C55 H110 O8 N1 P1	13.258	242371	0	1	1	1	0	242400	84532.2	400268	0	65.127	157868
PE(50:1)	PE	2 days, 2:01:00	2 days, 2:01:00	941.781	C55 H108 O8 N1 P1	8.509	4.145	0	1054	1054	1054	0	4368	2808.89	5927.11	0	35.694	1559.11
PE(50:2)	PE	2 days, 2:02:00	2 days, 2:02:00	939.766	C55 H106 O8 N1 P1	11.888	1.929	0	522500	247733	797267	274767	1008000	667740	1.34826e+06	52.587	33.756	340260
PE(50:2)	PE	2 days, 2:02:00	2 days, 2:02:00	939.766	C55 H106 O8 N1 P1	12.207	106.861	0.4	4963	3763.44	6162.56	1199.56	530400	125689	935111	24.17	76.303	404711
PE(51:10)	PE	2 days, 3:10:00	2 days, 3:10:00	937.656	C56 H92 O8 N1 P1	11.729	0.184	0	5768	3031.08	8504.92	2736.92	1060	632.216	1487.78	47.45	40.357	427.784
PE(52:9)	PE	2 days, 4:09:00	2 days, 4:09:00	953.687	C57 H96 O8 N1 P1	8.458	3.551	0.75	1113000	246385	1.97962e+06	866615	3952000	2.22865e+06	5.67535e+06	77.863	43.607	1.72335e+06
PE(53:3)	PE	2 days, 5:03:00	2 days, 5:03:00	979.797	C58 H110 O8 N1 P1	12.851	122374	0	1	1	1	0	122400	110899	133901	0	9.396	11500.7
PE(53:8)	PE	2 days, 5:08:00	2 days, 5:08:00	969.719	C58 H100 O8 N1 P1	12.158	453866	0	1	1	1	0	453900	336830	570970	0	25.792	117070
PE(54:7)	PE	2 days, 6:07:00	2 days, 6:07:00	985.75	C59 H104 O8 N1 P1	12.841	69.054	0	2534	2534	2534	0	175000	165041	184959	0	5.691	9959.25
PE(6:0/11:0)	PE	6:0/11:0	17:00:00	481.281	C22 H44 O8 N1 P1	7.089	68.482	0.021	10920	3905.76	17934.2	7014.24	747900	747900	747900	64.233	0	0
PE(6:0/22:1)	PE	6:0/22:1	1 day, 4:01:00	633.437	C33 H64 O8 N1 P1	8.584	0.67	0.478	3151000	1.35795e+06	4.94405e+06	1.79305e+06	2110000	1.12417e+06	3.09583e+06	56.904	46.722	985834
PE(6:0/24:0)	PE	6:0/24:0	1 day, 6:00:00	663.484	C35 H70 O8 N1 P1	7.709	9.661	0.341	64990	35946	94034	29044	627900	627900	627900	44.69	0	0
PE(6:0/24:1)	PE	6:0/24:1	1 day, 6:01:00	661.468	C35 H68 O8 N1 P1	8.913	13.169	0.152	25400	8562.85	42237.2	16837.2	334500	334500	334500	66.288	0	0
PE(8:0/18:2)	PE	8:0/18:2	1 day, 2:02:00	603.39	C31 H58 O8 N1 P1	7.783	800544	0	1	1	1	0	800500	447247	1.15375e+06	0	44.129	353253
PE(8:0/21:1)	PE	8:0/21:1	1 day, 5:01:00	647.453	C34 H66 O8 N1 P1	6.217	0.906	0.072	826600	758034	895166	68566.5	748500	748500	748500	8.295	0	0
PE(8:0/23:0)	PE	8:0/23:0	1 day, 7:00:00	677.5	C36 H72 O8 N1 P1	11.555	0.928	0.405	12210000	6.17618e+06	1.82438e+07	6.03382e+06	11330000	11330000	11330000	49.417	0	0
PE(8:0/8:0)	PE	8:0/8:0	16:00:00	467.265	C21 H42 O8 N1 P1	6.615	882.847	0.284	2240	850.349	3629.65	1389.65	1977000	1977000	1977000	62.038	0	0
PE(8:0/9:0)	PE	8:0/9:0	17:00:00	481.281	C22 H44 O8 N1 P1	1.854	0.786	0.62	482900	164698	801102	318202	379700	379700	379700	65.894	0	0
PE(8:0e/11:0)	PE	8:0e/11:0	19:0e	495.332	C24 H50 O7 N1 P1	6.472	0.968	0.088	31540000	2.74975e+07	3.55825e+07	4.04248e+06	30520000	30520000	30520000	12.817	0	0
PE(8:0e/13:0)	PE	8:0e/13:0	21:0e	523.364	C26 H54 O7 N1 P1	7.612	0.285	0.009	121300	48426.6	194173	72873.4	34550	31893.8	37206.2	60.077	7.688	2656.2
PE(8:0e/14:0)	PE	8:0e/14:0	22:0e	537.379	C27 H56 O7 N1 P1	6.395	0.612	0.627	5905	1994.35	9815.65	3910.65	3615	3436.2	3793.8	66.226	4.946	178.798
PE(8:0e/18:2)	PE	8:0e/18:2	26:2e	589.411	C31 H60 O7 N1 P1	11.627	0.984	0.189	18790000	1.0749e+07	2.6831e+07	8.04099e+06	18490000	18490000	18490000	42.794	0	0
PE(8:0e/21:1)	PE	8:0e/21:1	29:1e	633.473	C34 H68 O7 N1 P1	8.158	0.917	0.962	3377000	1.6114e+06	5.1426e+06	1.7656e+06	3097000	1.56717e+06	4.62683e+06	52.283	49.397	1.52983e+06
PE(8:0e/8:0)	PE	8:0e/8:0	16:0e	453.286	C21 H44 O7 N1 P1	4.966	1.038	0.093	273000	202126	343874	70873.5	283300	214240	352360	25.961	24.377	69060
PE(8:0p/10:0)	PE	8:0p/10:0	18:0p	479.301	C23 H46 O7 N1 P1	9.452	74.572	0.235	1144000	-3672.24	2.29167e+06	1.14767e+06	85330000	85330000	85330000	100.321	0	0
PE(8:0p/13:0)	PE	8:0p/13:0	21:0p	521.348	C26 H52 O7 N1 P1	6.094	0.449	0.175	618400	302577	934223	315823	277400	89786.1	465014	51.071	67.633	187614
PE(8:0p/13:1)	PE	8:0p/13:1	21:1p	519.332	C26 H50 O7 N1 P1	1.242	1.471	0.279	835600	449887	1.22131e+06	385713	1229000	1.18296e+06	1.27504e+06	46.16	3.746	46038.3
PE(8:0p/14:1)	PE	8:0p/14:1	22:1p	533.348	C27 H52 O7 N1 P1	11.271	0.972	0.682	3405000	2.03265e+06	4.77735e+06	1.37235e+06	3310000	2.52427e+06	4.09573e+06	40.304	23.738	785728
PE(8:0p/16:1)	PE	8:0p/16:1	24:1p	561.379	C29 H56 O7 N1 P1	11.49	0.988	0.791	1719000	855013	2.58299e+06	863987	1698000	1698000	1698000	50.261	0	0
PE(8:0p/19:1)	PE	8:0p/19:1	27:1p	603.426	C32 H62 O7 N1 P1	6.376	1.038	0.193	1002000	920708	1.08329e+06	81292.3	1039000	311347	1.76665e+06	8.113	70.034	727653
PE(8:0p/21:0)	PE	8:0p/21:0	29:0p	633.473	C34 H68 O7 N1 P1	7.356	4.558	0.336	632600	197574	1.06763e+06	435026	2883000	2883000	2883000	68.768	0	0
PE(8:0p/21:3)	PE	8:0p/21:3	29:3p	627.426	C34 H62 O7 N1 P1	11.175	0.995	0.531	11450000	10887347	12012653	562653	11390000	4.15302e+06	1.8627e+07	4.914	63.538	7.23698e+06
PE(8:0p/22:1)	PE	8:0p/22:1	30:1p	645.473	C35 H68 O7 N1 P1	12.169	0.923	0.872	594500	334644	854356	259856	549000	323152	774848	43.71	41.138	225848
PE(8:0p/23:3)	PE	8:0p/23:3	31:3p	655.458	C36 H66 O7 N1 P1	5.818	1.185	0.569	7515000	4.96448e+06	1.00655e+07	2.55052e+06	8905000	8905000	8905000	33.939	0	0
PE(8:0p/24:1)	PE	8:0p/24:1	32:1p	673.505	C37 H72 O7 N1 P1	11.717	1.054	0	8716000	8716000	8716000	0	9186000	7.2642e+06	1.11078e+07	0	20.921	1.9218e+06
PE(8:0p/24:1)	PE	8:0p/24:1	32:1p	673.505	C37 H72 O7 N1 P1	12.36	0.011	0.023	323400	112246	534554	211154	3437	1710.35	5163.65	65.292	50.237	1726.65
PE(8:0p/24:2)	PE	8:0p/24:2	32:2p	671.489	C37 H70 O7 N1 P1	7.274	0.766	0.982	571700	268922	874478	302778	437900	418129	457671	52.961	4.515	19771.2
PE(8:0p/24:6)	PE	8:0p/24:6	32:6p	663.426	C37 H62 O7 N1 P1	10.317	0.911	0.734	2679000	1.82346e+06	3.53454e+06	855539	2442000	2442000	2442000	31.935	0	0
PE(8:0p/8:0)	PE	8:0p/8:0	16:0p	451.27	C21 H42 O7 N1 P1	11.683	1.041	0.786	10480000	1.99822e+06	1.89618e+07	8.48178e+06	10910000	8.50707e+06	1.33129e+07	80.933	22.025	2.40293e+06
PE(8:0p/8:0)	PE	8:0p/8:0	16:0p	451.27	C21 H42 O7 N1 P1	6.517	1.041	0.934	12800	5512.83	20087.2	7287.17	13330	10318.4	16341.6	56.931	22.593	3011.65
PE(8:0p/8:0)	PE	8:0p/8:0	16:0p	451.27	C21 H42 O7 N1 P1	9.866	1.153	0.664	270900	94733.7	447066	176166	312400	235175	389625	65.03	24.72	77225.3
PE(8:0p/8:0)	PE	8:0p/8:0	16:0p	451.27	C21 H42 O7 N1 P1	9.432	1.218	0.711	526700	211333	842067	315367	641400	492512	790288	59.876	23.213	148888
PE(8:0p/8:0)	PE	8:0p/8:0	16:0p	451.27	C21 H42 O7 N1 P1	8.58	1.189	0.648	382300	186700	577900	195600	454600	437598	471602	51.164	3.74	17002
PE(8:0p/8:0)	PE	8:0p/8:0	16:0p	451.27	C21 H42 O7 N1 P1	10.576	4.618	0.109	929400	160861	1.69794e+06	768539	4292000	4292000	4292000	82.692	0	0
PE(9:0/12:0)	PE	9:0/12:0	21:00:00	537.343	C26 H52 O8 N1 P1	7.135	154589	0	1	1	1	0	154600	91962.3	217238	0	40.516	62637.7
PE(9:0/22:0)	PE	9:0/22:0	1 day, 7:00:00	677.5	C36 H72 O8 N1 P1	5.821	0.938	0.206	8351000	7.06511e+06	9.63689e+06	1.28589e+06	7837000	7837000	7837000	15.398	0	0
PE(9:0/9:0)	PE	9:0/9:0	18:00:00	495.296	C23 H46 O8 N1 P1	7.283	36.993	0.23	348000	159224	536776	188776	12870000	8194329	17545671	54.246	36.33	4675671
PEt(4:0/13:0)	PEt	4:0/13:0	17:00:00	466.27	C22 H43 O8 N0 P1	0.922	0.906	0	245500	245500	245500	0	222400	52788.9	392011	0	76.264	169611
PEt(42:10)	PEt	1 day, 18:10:00	1 day, 18:10:00	796.504	C47 H73 O8 N0 P1	10.793	0.803	0.369	4897000	3.8843e+06	5.9097e+06	1.0127e+06	3933000	997566	6.86843e+06	20.68	74.636	2.93543e+06
PEt(42:7)	PEt	1 day, 18:07:00	1 day, 18:07:00	802.551	C47 H79 O8 N0 P1	8.917	0.961	0.118	87080000	7.8689e+07	9.5471e+07	8.39103e+06	83660000	83660000	83660000	9.636	0	0
PEt(6:0/13:1)	PEt	6:0/13:1	19:01:00	492.285	C24 H45 O8 N0 P1	1.043	1.029	0.55	12050000	6.11863e+06	1.79814e+07	5.93137e+06	12390000	1.02437e+07	1.45363e+07	49.223	17.323	2.14632e+06
PEt(8:0e/16:2)	PEt	8:0e/16:2	24:2e	546.369	C29 H55 O7 N0 P1	1.073	0	0	49770000	49770000	49770000	0	2131	1959.03	2302.97	0	8.07	171.972
PEt(9:0/9:0)	PEt	9:0/9:0	18:00:00	480.285	C23 H45 O8 N0 P1	1.818	2.775	0.224	85660	16188	155132	69472	237700	175998	299402	81.102	25.958	61702.2
PG(11:0/17:2)	PG	11:0/17:2	1 day, 4:02:00	662.416	C34 H63 O10 N0 P1	10.82	0.98	0.206	20730000	1.76414e+07	2.38186e+07	3.08856e+06	20320000	20320000	20320000	14.899	0	0
PG(12:0p/19:4)	PG	12:0p/19:4	31:4p	684.437	C37 H65 O9 N0 P1	11.426	1.022	0.242	70570	31339.4	109801	39230.6	72090	58994.1	85185.9	55.591	18.166	13095.9
PG(12:0p/19:4)	PG	12:0p/19:4	31:4p	684.437	C37 H65 O9 N0 P1	8.996	0.734	0.745	10890000	5.81972e+06	1.59603e+07	5.07028e+06	7993000	7993000	7993000	46.559	0	0
PG(12:0p/19:4)	PG	12:0p/19:4	31:4p	684.437	C37 H65 O9 N0 P1	10.666	0.603	0.293	3439000	1.86999e+06	5.00801e+06	1.56901e+06	2072000	2072000	2072000	45.624	0	0
PG(14:0/17:2)	PG	14:0/17:2	1 day, 7:02:00	704.463	C37 H69 O10 N0 P1	11.506	0.772	0.456	1151000	638724	1.66328e+06	512276	889000	868233	909767	44.507	2.336	20767
PG(14:0/17:2)	PG	14:0/17:2	1 day, 7:02:00	704.463	C37 H69 O10 N0 P1	10.819	1.151	0.069	11980000	1.13017e+07	1.26583e+07	678308	13790000	13790000	13790000	5.662	0	0
PG(17:1/20:2)	PG	17:1/20:2	1 day, 13:03:00	786.541	C43 H79 O10 N0 P1	8.442	75.573	0.221	4060	3457.37	4662.63	602.626	306800	96608.3	516992	14.843	68.511	210192
PG(24:0/17:3)	PG	24:0/17:3	1 day, 17:03:00	842.604	C47 H87 O10 N0 P1	10.291	12.018	0.303	51430	-7067	109927	58497	618100	618100	618100	113.741	0	0
PG(25:1p)	PG	25:1p	25:1p	606.39	C31 H59 O9 N0 P1	11.514	0.591	0.984	19530	7763.76	31296.2	11766.2	11540	11540	11540	60.247	0	0
PG(27:1p)	PG	27:1p	27:1p	634.421	C33 H63 O9 N0 P1	9.388	0.515	0.163	513400	219607	807193	293793	264300	72912.4	455688	57.225	72.413	191388
PG(29:2/10:0)	PG	29:2/10:0	1 day, 15:02:00	816.588	C45 H85 O10 N0 P1	9.301	0.752	0.327	270200	202582	337818	67617.6	203200	203200	203200	25.025	0	0
PG(32:4/15:2)	PG	32:4/15:2	1 day, 23:06:00	920.651	C53 H93 O10 N0 P1	12.343	0	0	5288	2799.68	7776.32	2488.32	1.282	1.282	1.282	47.056	0	0
PG(4:0/15:0)	PG	4:0/15:0	19:00:00	540.306	C25 H49 O10 N0 P1	12.026	0.967	0.455	5498000	3.96829e+06	7.02771e+06	1.52971e+06	5315000	5315000	5315000	27.823	0	0
PG(6:0/16:2)	PG	6:0/16:2	22:02:00	578.322	C28 H51 O10 N0 P1	12.022	2.137	0.762	295400	140265	450535	155135	631200	385922	876478	52.517	38.859	245278
PG(6:0/22:3)	PG	6:0/22:3	1 day, 4:03:00	660.4	C34 H61 O10 N0 P1	5.836	0.945	0.417	5383000	4.0281e+06	6.7379e+06	1.3549e+06	5087000	1.40528e+06	8.76872e+06	25.17	72.375	3.68172e+06
PG(6:0/8:0)	PG	6:0/8:0	14:00:00	470.228	C20 H39 O10 N0 P1	3.51	62.992	0.233	8824	4258.29	13389.7	4565.71	555800	442433	669167	51.742	20.397	113367
PG(9:0/15:2)	PG	9:0/15:2	1 day, 0:02:00	606.353	C30 H55 O10 N0 P1	9.664	77.083	0.134	5500	4809.59	6190.41	690.415	423900	375262	472538	12.553	11.474	48638.3
phSM(d47:3)	phSM	d47:3	d47:3	896.735	C52 H101 O7 N2 P1	12.36	1.394	0	196900	94088.7	299711	102811	274500	162825	386175	52.215	40.683	111675
PI(15:2/20:3)	PI	15:2/20:3	1 day, 11:05:00	842.495	C44 H75 O13 N0 P1	10.28	26.054	0.219	32060	-8584.39	72704.4	40644.4	835300	835300	835300	126.776	0	0
PI(16:1/20:2)	PI	16:1/20:2	1 day, 12:03:00	860.542	C45 H81 O13 N0 P1	9.285	6.445	0.003	41000	11767.4	70232.6	29232.6	264200	133667	394733	71.299	49.407	130533
PI(16:1/20:4)	PI	16:1/20:4	1 day, 12:05:00	856.51	C45 H77 O13 N0 P1	9.604	5.171	0.003	32580	459.704	64700.3	32120.3	168500	148085	188915	98.589	12.116	20415.5
PI(18:1/20:4)	PI	18:1/20:4	1 day, 14:05:00	884.542	C47 H81 O13 N0 P1	9.24	3.38	0	190200	32092.4	348308	158108	642800	551915	733685	83.127	14.139	90885.5
PI(6:0/24:1)	PI	6:0/24:1	1 day, 6:01:00	780.479	C39 H73 O13 N0 P1	8.609	59.422	0.117	5378	3132.79	7623.21	2245.21	319600	268502	370698	41.748	15.988	51097.6
PIP(14:0/22:6)	PIP	14:0/22:6	1 day, 12:06:00	934.461	C45 H76 O16 N0 P2	12.192	377675	0	1	1	1	0	377700	59253.6	696146	0	84.312	318446
PIP(19:4/20:2)	PIP	19:4/20:2	1 day, 15:06:00	976.508	C48 H82 O16 N0 P2	10.911	0.919	0.661	6738	3351.21	10124.8	3386.79	6195	1909.05	10480.9	50.264	69.184	4285.95
PIP(34:3/19:1)	PIP	34:3/19:1	2 days, 5:04:00	1176.76	C62 H114 O16 N0 P2	10.11	1.207	0.01	1283000	429625	2.13637e+06	853375	1548000	691817	2.40418e+06	66.514	55.309	856183
PIP(4:0/21:6)	PIP	4:0/21:6	1 day, 1:06:00	780.289	C34 H54 O16 N0 P2	8.931	538700	0	1	1	1	0	538700	537660	539740	0	0.193	1039.69
PIP(9:0/9:0)	PIP	9:0/9:0	18:00:00	694.273	C27 H52 O16 N0 P2	5.635	0.648	0	2569	1018.79	4119.21	1550.21	1665	1219.16	2110.84	60.343	26.777	445.837
PIP2(14:1/14:1)	PIP2	14:1/14:1	1 day, 4:02:00	910.365	C37 H69 O19 N0 P3	9.677	544102	0	1	1	1	0	544100	447876	640324	0	17.685	96224.1
PIP2(18:2/18:2)	PIP2	18:2/18:2	1 day, 12:04:00	1018.46	C45 H81 O19 N0 P3	8.87	71.617	0.436	7527	2637.84	12416.2	4889.16	539100	392907	685293	64.955	27.118	146193
PIP2(6:0/11:0)	PIP2	6:0/11:0	17:00:00	760.224	C26 H51 O19 N0 P3	9.039	1.032	0.46	633100	593981	672219	39119.2	653500	653500	653500	6.179	0	0
PIP2(6:0/15:0)	PIP2	6:0/15:0	21:00:00	816.286	C30 H59 O19 N0 P3	9.103	0.803	0.136	599700	535802	663598	63898	481300	481300	481300	10.655	0	0
PIP2(6:0/20:0)	PIP2	6:0/20:0	1 day, 2:00:00	886.365	C35 H69 O19 N0 P3	8.662	70.803	0.289	4428	2243.93	6612.07	2184.07	313500	120613	506387	49.324	61.527	192887
PIP3(6:0/21:2)	PIP3	6:0/21:2	1 day, 3:02:00	976.315	C36 H68 O22 N0 P4	8.769	0.403	0	5111	2248.58	7973.42	2862.42	2059	575.182	3542.82	56.005	72.065	1483.82
PMe(11:0/21:0)	PMe	11:0/21:0	1 day, 8:00:00	662.489	C36 H71 O8 N0 P1	10.817	1.142	0.081	33710000	2.9768e+07	3.7652e+07	3.94205e+06	38510000	2.53288e+07	5.16912e+07	11.694	34.228	1.31812e+07
PMe(11:0/23:6)	PMe	11:0/23:6	1 day, 10:06:00	678.426	C38 H63 O8 N0 P1	12.436	0.83	0.731	65040	11230.5	118850	53809.5	53970	53970	53970	82.733	0	0
PMe(11:0/23:6)	PMe	11:0/23:6	1 day, 10:06:00	678.426	C38 H63 O8 N0 P1	11.132	0.735	0.942	1027000	757905	1.29609e+06	269095	755000	631052	878948	26.202	16.417	123948
PMe(14:0p/8:0)	PMe	14:0p/8:0	22:0p	506.337	C26 H51 O7 N0 P1	8.913	0.513	0.784	3496000	1.15802e+06	5.83398e+06	2.33798e+06	1795000	1.17109e+06	2.41891e+06	66.876	34.758	623906
PMe(16:1/16:2)	PMe	16:1/16:2	1 day, 8:03:00	656.442	C36 H65 O8 N0 P1	10.821	1.113	0	36840000	3.57271e+07	3.79529e+07	1.11294e+06	41000000	29881620	52118380	3.021	27.118	11118380
PMe(17:4/15:1)	PMe	17:4/15:1	1 day, 8:05:00	652.41	C36 H61 O8 N0 P1	10.662	0.718	0.635	272700	94250.6	451149	178449	195900	68962.7	322837	65.438	64.797	126937
PMe(17:4/15:1)	PMe	17:4/15:1	1 day, 8:05:00	652.41	C36 H61 O8 N0 P1	9.011	24.946	0.076	615400	292832	937968	322568	15350000	2436045	28263955	52.416	84.13	12913955
PMe(17:4/16:0)	PMe	17:4/16:0	1 day, 9:04:00	668.442	C37 H65 O8 N0 P1	9.605	1.011	0.268	16090000	1.16673e+07	2.05127e+07	4.42266e+06	16280000	16280000	16280000	27.487	0	0
PMe(17:4/16:0)	PMe	17:4/16:0	1 day, 9:04:00	668.442	C37 H65 O8 N0 P1	9.295	1.034	0.395	16820000	9.14386e+06	2.44961e+07	7.67614e+06	17390000	17390000	17390000	45.637	0	0
PMe(17:4/16:0)	PMe	17:4/16:0	1 day, 9:04:00	668.442	C37 H65 O8 N0 P1	11.844	0.907	0.797	7700000	3314465	12085535	4385535	6982000	3.81378e+06	1.01502e+07	56.955	45.377	3.16822e+06
PMe(17:4/16:0)	PMe	17:4/16:0	1 day, 9:04:00	668.442	C37 H65 O8 N0 P1	11.471	0.894	0.792	8676000	5.11598e+06	1.2236e+07	3.56002e+06	7754000	7754000	7754000	41.033	0	0
PMe(17:4/18:3)	PMe	17:4/18:3	1 day, 11:07:00	690.426	C39 H63 O8 N0 P1	10.08	0.917	0.176	13290000	1.01134e+07	1.64666e+07	3.17658e+06	12180000	10058244	14301756	23.902	17.42	2.12176e+06
PMe(17:4/24:0)	PMe	17:4/24:0	1 day, 17:04:00	780.567	C45 H81 O8 N0 P1	13.151	1.471	0.457	2590000	1.39852e+06	3.78148e+06	1.19148e+06	3810000	3810000	3810000	46.003	0	0
PMe(19:4/12:0)	PMe	19:4/12:0	1 day, 7:04:00	640.41	C35 H61 O8 N0 P1	11.49	0.394	0.37	766100	346139	1.18606e+06	419961	302100	211252	392948	54.818	30.072	90847.5
PMe(19:4/22:2)	PMe	19:4/22:2	1 day, 17:06:00	776.536	C45 H77 O8 N0 P1	7.145	0.974	0.966	250100	96918.8	403281	153181	243700	243700	243700	61.248	0	0
PMe(4:0/10:0)	PMe	4:0/10:0	14:00:00	410.207	C18 H35 O8 N0 P1	2.641	0.694	0.6	465700	334955	596445	130745	323300	180573	466027	28.075	44.147	142727
PMe(4:0/15:2)	PMe	4:0/15:2	19:02:00	476.254	C23 H41 O8 N0 P1	0.968	0.469	0	1112000	1112000	1112000	0	521700	200568	842832	0	61.555	321132
PMe(4:0/21:0)	PMe	4:0/21:0	1 day, 1:00:00	564.379	C29 H57 O8 N0 P1	10.818	1.513	0.076	4239000	3.37195e+06	5.10605e+06	867045	6413000	1.37764e+06	1.14484e+07	20.454	78.518	5.03536e+06
PMe(41:4)	PMe	1 day, 17:04:00	1 day, 17:04:00	780.567	C45 H81 O8 N0 P1	10.689	0.572	0.342	7768000	5.04757e+06	1.04884e+07	2.72043e+06	4443000	1.86335e+06	7.02265e+06	35.021	58.061	2.57965e+06
PMe(41:4)	PMe	1 day, 17:04:00	1 day, 17:04:00	780.567	C45 H81 O8 N0 P1	8.923	0.369	0.067	68870000	3.13544e+07	1.06386e+08	3.75156e+07	25440000	25440000	25440000	54.473	0	0
PMe(6:0/13:1)	PMe	6:0/13:1	19:01:00	478.27	C23 H43 O8 N0 P1	1.134	0.036	0	197700	197700	197700	0	7208	-726.062	15142.1	0	110.073	7934.06
PMe(8:0/15:2)	PMe	8:0/15:2	23:02:00	532.317	C27 H49 O8 N0 P1	0.975	1.61	0.473	7191	3393	10989	3798	11570	7294.77	15845.2	52.816	36.951	4275.23
PS(10:0/10:0)	PS	10:0/10:0	20:00:00	567.317	C26 H50 O10 N1 P1	9.039	0.654	0.159	18000	10944.9	25055.1	7055.1	11770	6981.38	16558.6	39.195	40.685	4788.62
PS(10:0/15:2)	PS	10:0/15:2	1 day, 1:02:00	633.364	C31 H56 O10 N1 P1	8.072	1.216	0.981	2455	1728.27	3181.73	726.729	2986	2759.87	3212.13	29.602	7.573	226.13
PS(10:0e/19:3)	PS	10:0e/19:3	29:3e	673.432	C35 H64 O9 N1 P1	10.819	0.282	0.241	6170000	1.91554e+06	1.04245e+07	4.25446e+06	1742000	1.06574e+06	2.41826e+06	68.954	38.821	676262
PS(14:0/14:0)	PS	14:0/14:0	1 day, 4:00:00	679.442	C34 H66 O10 N1 P1	10.817	0.478	0.977	6088000	3.41324e+06	8.76276e+06	2.67476e+06	2908000	523091	5.29291e+06	43.935	82.012	2.38491e+06
PS(18:0/18:1)	PS	18:0/18:1	1 day, 12:01:00	789.552	C42 H80 O10 N1 P1	13.575	1.686	0.006	564100	146745	981455	417355	951300	951300	951300	73.986	0	0
PS(19:2/17:3)	PS	19:2/17:3	1 day, 12:05:00	781.489	C42 H72 O10 N1 P1	9.76	35.17	0.085	35360	-8482.51	79202.5	43842.5	1244000	1244000	1244000	123.989	0	0
PS(19:2/24:6)	PS	19:2/24:6	1 day, 19:08:00	873.552	C49 H80 O10 N1 P1	1.072	1.468	0.797	135300	54977.8	215622	80322.2	198700	198700	198700	59.366	0	0
PS(20:0/18:2)	PS	20:0/18:2	1 day, 14:02:00	815.568	C44 H82 O10 N1 P1	5.558	52.314	0.229	30590	22048.4	39131.6	8541.65	1600000	837168	2362832	27.923	47.677	762832
PS(29:0/12:0)	PS	29:0/12:0	1 day, 17:00:00	861.646	C47 H92 O10 N1 P1	10.037	6.223	0.022	11550	6296.14	16803.9	5253.86	71880	71880	71880	45.488	0	0
PS(31:6/13:0)	PS	31:6/13:0	1 day, 20:06:00	891.599	C50 H86 O10 N1 P1	5.476	0.963	0.485	1196000	1.0942e+06	1.2978e+06	101804	1152000	844013	1.45999e+06	8.512	26.735	307987
PS(36:3/10:0)	PS	36:3/10:0	1 day, 22:03:00	925.677	C52 H96 O10 N1 P1	7.723	0.228	0.06	4507	1326.59	7687.41	3180.41	1029	1029	1029	70.566	0	0
PS(6:0/20:5)	PS	6:0/20:5	1 day, 2:05:00	641.333	C32 H52 O10 N1 P1	6.212	2.512	0	1452	370.187	2533.81	1081.81	3647	1524.48	5769.52	74.505	58.199	2122.52
SM(d14:0/18:1)	SM	d14:0/18:1	d32:1	674.536	C37 H75 O6 N2 P1	9.68	1.778	0.002	185500	50884.5	320115	134615	329800	254648	404952	72.569	22.787	75151.5
SM(d14:1/27:3)	SM	d14:1/27:3	d41:4	794.63	C46 H87 O6 N2 P1	10.494	9.466	0.001	838700	52301.3	1.6251e+06	786399	7938000	7938000	7938000	93.764	0	0
SM(d14:1/28:1)	SM	d14:1/28:1	d42:2	812.677	C47 H93 O6 N2 P1	8.924	213.405	0.295	5204	1551.31	8856.69	3652.69	1111000	307814	1.91419e+06	70.19	72.294	803186
SM(d15:0/19:1)	SM	d15:0/19:1	d34:1	702.568	C39 H79 O6 N2 P1	10.13	2.546	0.002	17040000	2992224	31087776	14047776	43380000	43380000	43380000	82.44	0	0
SM(d15:0/23:2)	SM	d15:0/23:2	d38:2	756.615	C43 H85 O6 N2 P1	11.582	0.798	0.735	675700	449962	901438	225738	539400	488718	590082	33.408	9.396	50682
SM(d17:0/24:3)	SM	d17:0/24:3	d41:3	796.646	C46 H89 O6 N2 P1	10.876	2.439	0	600300	196010	1.00459e+06	404290	1464000	892835	2.03516e+06	67.348	39.014	571165
SM(d18:1)	SM	d18:1	d18:1	478.317	C23 H47 O6 N2 P1	6.427	2.415	0.095	49800	22606.2	76993.8	27193.8	120300	120300	120300	54.606	0	0
SM(d18:1/10:0)	SM	d18:1/10:0	d28:1	618.474	C33 H67 O6 N2 P1	11.312	2.929	0.297	143500	95664.3	191336	47835.7	420400	420400	420400	33.335	0	0
SM(d18:1/24:1)	SM	d18:1/24:1	d42:2	812.677	C47 H93 O6 N2 P1	11.247	3.841	0.001	10900000	1.71043e+06	20089572	9.18957e+06	41880000	41880000	41880000	84.308	0	0
SM(d18:1/24:2)	SM	d18:1/24:2	d42:3	810.662	C47 H91 O6 N2 P1	10.932	5.142	0	1367000	376185	2.35782e+06	990815	7030000	7030000	7030000	72.481	0	0
SM(d18:2/18:4)	SM	d18:2/18:4	d36:6	720.521	C41 H73 O6 N2 P1	10.281	0.925	0.274	702000	210263	1.19374e+06	491737	649500	649500	649500	70.048	0	0
SM(d20:0/22:1)	SM	d20:0/22:1	d42:1	814.693	C47 H95 O6 N2 P1	11.772	1.661	0.011	17510000	3.35964e+06	3.16604e+07	1.41504e+07	29070000	2.14775e+07	3.66625e+07	80.813	26.118	7.5925e+06
SM(d20:2/22:6)	SM	d20:2/22:6	d42:8	800.583	C47 H81 O6 N2 P1	11.519	206.18	0.252	9606	5492.81	13719.2	4113.19	1980000	385961	3.57404e+06	42.819	80.507	1.59404e+06
SM(d24:0/10:0)	SM	d24:0/10:0	d34:0	704.583	C39 H81 O6 N2 P1	10.288	3.452	0.018	1832000	479911	3.18409e+06	1.35209e+06	6325000	4.417e+06	8.233e+06	73.804	30.166	1.908e+06
SM(d33:0)	SM	d33:0	d33:0	690.568	C38 H79 O6 N2 P1	9.1	111.12	0.225	94260	65060.1	123460	29199.9	10470000	10470000	10470000	30.978	0	0
SM(d34:2)	SM	d34:2	d34:2	700.552	C39 H77 O6 N2 P1	9.752	1.919	0	266100	69478.7	462721	196621	510500	510500	510500	73.89	0	0
SM(d35:7)	SM	d35:7	d35:7	704.489	C40 H69 O6 N2 P1	10.286	1.392	0.026	2532000	843637	4.22036e+06	1.68836e+06	3524000	3524000	3524000	66.681	0	0
SM(d36:6)	SM	d36:6	d36:6	720.521	C41 H73 O6 N2 P1	11.188	0.806	0	5499000	5.13651e+06	5.86149e+06	362494	4432000	2.03234e+06	6.83166e+06	6.592	54.144	2.39966e+06
SM(d39:3)	SM	d39:3	d39:3	768.615	C44 H85 O6 N2 P1	10.479	5.011	0.001	938900	63516.6	1.81428e+06	875383	4705000	2.54479e+06	6.86521e+06	93.235	45.913	2.16021e+06
SM(d40:1)	SM	d40:1	d40:1	786.662	C45 H91 O6 N2 P1	11.894	0.934	0.155	1114000	203071	2.02493e+06	910929	1041000	576162	1.50584e+06	81.771	44.653	464838
SM(d41:5)	SM	d41:5	d41:5	792.615	C46 H85 O6 N2 P1	10.293	23.039	0.047	34480	10143.7	58816.3	24336.3	794400	794400	794400	70.581	0	0
SoP(d18:0)	SoP	d18:0	d18:0	381.264	C18 H40 O5 N1 P1	6.567	2.217	0.439	185500	72387.7	298612	113112	411300	391064	431536	60.977	4.92	20236
TG(10:0/12:0/12:0)	TG	10:0/12:0/12:0	1 day, 10:00:00	610.517	C37 H70 O6	11.176	1.049	0.184	11450000	1.03761e+07	1.25239e+07	1.0739e+06	12010000	8.97195e+06	1.5048e+07	9.379	25.296	3.03805e+06
TG(10:0/13:0/15:2)	TG	10:0/13:0/15:2	1 day, 14:02:00	662.548	C41 H74 O6	11.493	1.077	0.511	5916000	5.25004e+06	6.58196e+06	665964	6370000	1.26432e+06	1.14757e+07	11.257	80.152	5.10568e+06
TG(10:0/19:3/23:6)	TG	10:0/19:3/23:6	2 days, 4:09:00	844.658	C55 H88 O6	8.572	1.049	0.047	297900	228066	367734	69833.7	312400	62520.6	562279	23.442	79.987	249879
TG(11:0/18:2/18:2)	TG	11:0/18:2/18:2	1 day, 23:04:00	784.658	C50 H88 O6	7.884	421438	0	1	1	1	0	421400	415711	427089	0	1.35	5688.9
TG(12:0/12:0/12:0)	TG	12:0/12:0/12:0	1 day, 12:00:00	638.548	C39 H74 O6	11.38	0.973	0.278	14820000	1.44276e+07	1.52124e+07	392434	14420000	4512739	24327261	2.648	68.705	9907261
TG(12:0/12:0/14:0)	TG	12:0/12:0/14:0	1 day, 14:00:00	666.58	C41 H78 O6	11.557	0.936	0.019	12620000	1.21577e+07	1.30823e+07	462271	11810000	4.71184e+06	1.89082e+07	3.663	60.103	7.09816e+06
TG(12:0/13:1/18:3)	TG	12:0/13:1/18:3	1 day, 19:04:00	728.596	C46 H80 O6	1.052	410158	0	1	1	1	0	410200	364512	455888	0	11.138	45688.1
TG(12:0e/14:1/17:0)	TG	12:0e/14:1/17:0	43:1e	720.663	C46 H88 O5	12.053	1.036	0	4890	4336.65	5443.35	553.352	5065	3873.1	6256.9	11.316	23.532	1191.9
TG(12:0e/16:2/16:2)	TG	12:0e/16:2/16:2	44:4e	728.632	C47 H84 O5	10.521	165.109	0.229	30140	14479.9	45800.1	15660.1	4976000	4976000	4976000	51.958	0	0
TG(14:0/14:1/18:3)	TG	14:0/14:1/18:3	1 day, 22:04:00	770.642	C49 H86 O6	10.13	246819	0	1	1	1	0	246800	78050.5	415550	0	68.375	168750
TG(14:0e/16:0/16:2)	TG	14:0e/16:0/16:2	46:2e	760.694	C49 H92 O5	11.547	0.949	0.07	5393000	3.03691e+06	7.74909e+06	2.35609e+06	5118000	3.46192e+06	6.77408e+06	43.688	32.358	1.65608e+06
TG(14:0p/19:5/19:5)	TG	14:0p/19:5/19:5	52:10p	826.648	C55 H86 O5	1.077	44.423	0.224	68290	-19517.3	156097	87807.3	3034000	3034000	3034000	128.58	0	0
TG(14:0p/20:5/24:7)	TG	14:0p/20:5/24:7	58:12p	906.71	C61 H94 O5	1.062	0.424	0.388	58890	19888.9	97891.1	39001.1	24990	24990	24990	66.227	0	0
TG(15:0/14:0/16:0)	TG	15:0/14:0/16:0	1 day, 21:00:00	764.689	C48 H92 O6	12.115	0.98	0.156	6494000	4.71627e+06	8.27173e+06	1.77773e+06	6367000	1.17764e+06	1.15564e+07	27.375	81.504	5.18936e+06
TG(15:0/16:0/16:0)	TG	15:0/16:0/16:0	1 day, 23:00:00	792.721	C50 H96 O6	12.282	0.898	0.756	5653000	5.086e+06	6.22e+06	566996	5075000	5075000	5075000	10.03	0	0
TG(15:0/16:1/16:1)	TG	15:0/16:1/16:1	1 day, 23:02:00	788.689	C50 H92 O6	11.972	0.749	0.141	4041000	1.55675e+06	6.52525e+06	2.48425e+06	3025000	3025000	3025000	61.476	0	0
TG(15:0/17:1/19:2)	TG	15:0/17:1/19:2	2 days, 3:03:00	842.736	C54 H98 O6	10.287	383864	0	1	1	1	0	383900	217829	549971	0	43.259	166071
TG(15:1/11:0/11:0)	TG	15:1/11:0/11:0	1 day, 13:01:00	650.548	C40 H74 O6	5.7	850.621	0.22	5637	2138.23	9135.77	3498.77	4795000	4795000	4795000	62.068	0	0
TG(15:1/16:1/16:1)	TG	15:1/16:1/16:1	1 day, 23:03:00	786.674	C50 H90 O6	11.839	0.957	0.135	1025000	358791	1691209	666209	980500	980500	980500	64.996	0	0
TG(15:1/22:5/24:0)	TG	15:1/22:5/24:0	2 days, 13:06:00	976.846	C64 H112 O6	8.787	59.027	0.288	7406	2409.17	12402.8	4996.83	437200	96127.2	778273	67.47	78.013	341073
TG(16:0/13:0/16:2)	TG	16:0/13:0/16:2	1 day, 21:02:00	760.658	C48 H88 O6	11.541	1.077	0.824	5916000	5.25293e+06	6.57907e+06	663065	6370000	2.88293e+06	9.85707e+06	11.208	54.742	3.48707e+06
TG(16:0/14:0/16:1)	TG	16:0/14:0/16:1	1 day, 22:01:00	776.689	C49 H92 O6	12.043	0.767	0.197	8485000	2.28323e+06	1.46868e+07	6.20177e+06	6506000	2.12701e+06	1.0885e+07	73.091	67.307	4.37899e+06
TG(16:0/16:0/16:0)	TG	16:0/16:0/16:0	2 days, 0:00:00	806.736	C51 H98 O6	12.383	1.037	0.414	8445000	6.23047e+06	1.06595e+07	2.21453e+06	8759000	6.91768e+06	1.06003e+07	26.223	21.022	1.84132e+06
TG(16:0/16:0/17:1)	TG	16:0/16:0/17:1	2 days, 1:01:00	818.736	C52 H98 O6	12.285	0.98	0.091	3349000	1.59299e+06	5.10501e+06	1.75601e+06	3282000	1.79263e+06	4.77137e+06	52.434	45.38	1.48937e+06
TG(16:0/16:0/18:1)	TG	16:0/16:0/18:1	2 days, 2:01:00	832.752	C53 H100 O6	12.363	1.562	0	4615000	2645318	6584682	1969682	7208000	7208000	7208000	42.68	0	0
TG(16:0/16:0/24:0)	TG	16:0/16:0/24:0	2 days, 8:00:00	918.861	C59 H114 O6	13.163	0.911	0.7	498100	411376	584824	86724.2	453900	453900	453900	17.411	0	0
TG(16:0/16:1/16:1)	TG	16:0/16:1/16:1	2 days, 0:02:00	802.705	C51 H94 O6	12.054	0.792	0.094	7832000	3.08283e+06	1.25812e+07	4.74917e+06	6205000	1.51073e+06	1.08993e+07	60.638	75.653	4.69427e+06
TG(16:0/16:1/18:1)	TG	16:0/16:1/18:1	2 days, 2:02:00	830.736	C53 H98 O6	12.198	1.409	0	5415000	2.92659e+06	7.90341e+06	2.48841e+06	7632000	7632000	7632000	45.954	0	0
TG(16:0/17:1/18:1)	TG	16:0/17:1/18:1	2 days, 3:02:00	844.752	C54 H100 O6	12.274	0.892	0.049	1929000	944400	2.9136e+06	984600	1721000	989782	2.45222e+06	51.042	42.488	731218
TG(16:0/18:1/18:1)	TG	16:0/18:1/18:1	2 days, 4:02:00	858.768	C55 H102 O6	12.349	2.421	0	4811000	2.69074e+06	6.93126e+06	2.12026e+06	11650000	11650000	11650000	44.071	0	0
TG(16:0/18:1/18:2)	TG	16:0/18:1/18:2	2 days, 4:03:00	856.752	C55 H100 O6	12.184	2.225	0	3926000	2.02173e+06	5.83027e+06	1.90427e+06	8736000	4.59435e+06	1.28777e+07	48.504	47.409	4.14165e+06
TG(16:0/18:2/20:4)	TG	16:0/18:2/20:4	2 days, 6:06:00	878.736	C57 H98 O6	11.962	3.05	0	794700	485744	1.10366e+06	308956	2424000	1918596	2929404	38.877	20.85	505404
TG(16:0/8:0/23:0)	TG	16:0/8:0/23:0	1 day, 23:00:00	792.721	C50 H96 O6	5.636	1.987	0.517	3360	1789.67	4930.33	1570.33	6674	2249	11099	46.736	66.302	4425
TG(16:1/13:1/19:2)	TG	16:1/13:1/19:2	2 days, 0:04:00	798.674	C51 H90 O6	1.042	0.727	0.268	39680	9458.12	69901.9	30221.9	28870	26539.9	31200.1	76.164	8.071	2330.1
TG(16:1/14:1/16:1)	TG	16:1/14:1/16:1	1 day, 22:03:00	772.658	C49 H88 O6	11.766	0.705	0.155	838600	343281	1.33392e+06	495319	591500	518160	664840	59.065	12.399	73340.1
TG(16:1/16:1/17:0)	TG	16:1/16:1/17:0	2 days, 1:02:00	816.721	C52 H96 O6	12.127	0.767	0.12	4344000	1.80889e+06	6.87911e+06	2.53511e+06	3330000	1.53873e+06	5.12127e+06	58.359	53.792	1.79127e+06
TG(16:1/16:1/17:1)	TG	16:1/16:1/17:1	2 days, 1:03:00	814.705	C52 H94 O6	11.99	0.834	0.356	1374000	800451	1.94755e+06	573549	1146000	1.03155e+06	1.26045e+06	41.743	9.987	114451
TG(16:1/16:1/18:1)	TG	16:1/16:1/18:1	2 days, 2:03:00	828.721	C53 H96 O6	12.053	1.191	0.001	3046000	1.6332e+06	4.4588e+06	1.4128e+06	3628000	1.23602e+06	6.01998e+06	46.382	65.931	2.39198e+06
TG(16:1/8:0/13:0)	TG	16:1/8:0/13:0	1 day, 13:01:00	650.548	C40 H74 O6	7.337	1.404	0.254	1025000	402364	1.64764e+06	622636	1438000	1.22919e+06	1.64681e+06	60.745	14.521	208812
TG(16:1/8:0/8:0)	TG	16:1/8:0/8:0	1 day, 8:01:00	580.47	C35 H64 O6	7.865	2.366	0.045	357900	311996	403804	45904.3	847000	426261	1.26774e+06	12.826	49.674	420739
TG(17:0/18:1/18:2)	TG	17:0/18:1/18:2	2 days, 5:03:00	870.768	C56 H102 O6	12.276	1.587	0	442300	199566	685034	242734	702100	702100	702100	54.88	0	0
TG(17:1/17:1/17:1)	TG	17:1/17:1/17:1	2 days, 3:03:00	842.736	C54 H98 O6	12.134	0.887	0.018	1042000	547779	1.53622e+06	494221	923800	407248	1.44035e+06	47.43	55.916	516552
TG(17:2/17:2/21:5)	TG	17:2/17:2/21:5	2 days, 7:09:00	886.705	C58 H94 O6	9.56	0.844	0.13	8009	4298.59	11719.4	3710.41	6755	2026.84	11483.2	46.328	69.995	4728.16
TG(17:4/10:0/19:5)	TG	17:4/10:0/19:5	1 day, 22:09:00	760.564	C49 H76 O6	10.682	3.944	0	1717000	283219	3.15078e+06	1.43378e+06	6771000	2.99048e+06	1.05515e+07	83.505	55.834	3.78052e+06
TG(17:4/13:1/17:3)	TG	17:4/13:1/17:3	1 day, 23:08:00	776.596	C50 H80 O6	1.071	0.785	0.477	158300	56136.3	260464	102164	124300	40442.2	208158	64.538	67.464	83857.8
TG(17:4/18:2/18:2)	TG	17:4/18:2/18:2	2 days, 5:08:00	860.689	C56 H92 O6	8.579	45.082	0.196	5074	1641.79	8506.21	3432.21	228800	207869	249731	67.643	9.148	20930.6
TG(18:0/16:0/16:0)	TG	18:0/16:0/16:0	2 days, 2:00:00	834.768	C53 H102 O6	12.559	1.043	0.07	2424000	2.21641e+06	2.63159e+06	207591	2528000	2528000	2528000	8.564	0	0
TG(18:0/16:0/18:0)	TG	18:0/16:0/18:0	2 days, 4:00:00	862.799	C55 H106 O6	12.742	1.093	0.008	1074000	963915	1184085	110085	1174000	746335	1.60166e+06	10.25	36.428	427665
TG(18:0/16:0/18:1)	TG	18:0/16:0/18:1	2 days, 4:01:00	860.783	C55 H104 O6	12.536	1.582	0	1523000	828482	2.21752e+06	694518	2409000	1.09159e+06	3.72641e+06	45.602	54.687	1.31741e+06
TG(18:0/17:1/20:5)	TG	18:0/17:1/20:5	2 days, 7:06:00	892.752	C58 H100 O6	10.636	50.068	0.19	20180	8621.1	31738.9	11558.9	1010000	732270	1.28773e+06	57.279	27.498	277730
TG(18:0/18:1/18:1)	TG	18:0/18:1/18:1	2 days, 6:02:00	886.799	C57 H106 O6	12.512	2.153	0	1235000	654056	1815944	580944	2659000	2659000	2659000	47.04	0	0
TG(18:0/18:1/18:2)	TG	18:0/18:1/18:2	2 days, 6:03:00	884.783	C57 H104 O6	12.343	2.496	0	3517000	1.75052e+06	5.28348e+06	1.76648e+06	8779000	3.82369e+06	1.37343e+07	50.227	56.445	4.95531e+06
TG(18:0/18:1/20:3)	TG	18:0/18:1/20:3	2 days, 8:04:00	910.799	C59 H106 O6	12.332	3.278	0	696300	340386	1.05221e+06	355914	2282000	1.7858e+06	2.7782e+06	51.115	21.744	496198
TG(18:0e/13:0/21:6)	TG	18:0e/13:0/21:6	52:6e	836.726	C55 H96 O5	5.598	234.256	0.348	4819	1859.89	7778.11	2959.11	1129000	354100	1.9039e+06	61.405	68.636	774900
TG(18:1/12:0/12:0)	TG	18:1/12:0/12:0	1 day, 18:01:00	720.627	C45 H84 O6	11.717	0.728	0.517	1778000	939940	2.61606e+06	838060	1294000	726620	1.86138e+06	47.135	43.847	567380
TG(18:1/14:1/22:0)	TG	18:1/14:1/22:0	2 days, 6:02:00	886.799	C57 H106 O6	9.554	2.51811e+06	0	1	1	1	0	2518000	1.69796e+06	3.33804e+06	0	32.567	820037
TG(18:1/17:2/24:6)	TG	18:1/17:2/24:6	2 days, 11:09:00	942.768	C62 H102 O6	11.753	0.94	0.441	5164000	4.44099e+06	5.88701e+06	723012	4855000	4855000	4855000	14.001	0	0
TG(18:1/18:1/18:2)	TG	18:1/18:1/18:2	2 days, 6:04:00	882.768	C57 H102 O6	12.175	2.93	0	3003000	1.46703e+06	4.53897e+06	1.53597e+06	8798000	7.23521e+06	1.03608e+07	51.148	17.763	1.56279e+06
TG(18:1/18:2/18:2)	TG	18:1/18:2/18:2	2 days, 6:05:00	880.752	C57 H100 O6	12.026	2.316	0	3371000	1.38015e+06	5.36185e+06	1.99085e+06	7806000	3.93376e+06	1.16782e+07	59.058	49.606	3.87224e+06
TG(18:1/18:2/20:2)	TG	18:1/18:2/20:2	2 days, 8:05:00	908.783	C59 H104 O6	12.251	3.468	0	2411000	1.11109e+06	3.71091e+06	1.29991e+06	8362000	8362000	8362000	53.916	0	0
TG(18:1/18:2/20:3)	TG	18:1/18:2/20:3	2 days, 8:06:00	906.768	C59 H102 O6	12.102	3.348	0	1695000	964811	2.42519e+06	730189	5674000	5674000	5674000	43.079	0	0
TG(18:3/20:4/20:4)	TG	18:3/20:4/20:4	2 days, 10:11:00	924.721	C61 H96 O6	9.557	1.72651e+06	0	1	1	1	0	1727000	811690	2642310	0	53	915310
TG(19:0/19:3/19:3)	TG	19:0/19:3/19:3	2 days, 9:06:00	920.783	C60 H104 O6	8.403	41.272	0	3765	3363.16	4166.84	401.838	155400	136175	174625	10.673	12.371	19224.5
TG(19:0/8:0/8:0)	TG	19:0/8:0/8:0	1 day, 11:00:00	624.533	C38 H72 O6	9.243	3.29	0	153900	52826.2	254974	101074	506500	487440	525560	65.675	3.763	19059.6
TG(19:2/20:5/21:3)	TG	19:2/20:5/21:3	2 days, 12:10:00	954.768	C63 H102 O6	11.873	2.633	0	215800	48373.7	383226	167426	568400	568400	568400	77.584	0	0
TG(19:3/17:1/17:1)	TG	19:3/17:1/17:1	2 days, 5:05:00	866.736	C56 H98 O6	10.55	176.042	0	4352	4352	4352	0	766100	704046	828154	0	8.1	62054.1
TG(19:5/14:1/23:3)	TG	19:5/14:1/23:3	2 days, 8:09:00	900.721	C59 H96 O6	9.258	324007	0	1	1	1	0	324000	290291	357709	0	10.404	33709
TG(20:0/8:0/16:1)	TG	20:0/8:0/16:1	1 day, 20:01:00	748.658	C47 H88 O6	7.052	0.982	0.607	5637	2138.23	9135.77	3498.77	5538	2920.74	8155.26	62.068	47.26	2617.26
TG(20:1/18:1/18:1)	TG	20:1/18:1/18:1	2 days, 8:03:00	912.815	C59 H108 O6	12.504	2.159	0	395000	220635	569365	174365	852700	775590	929810	44.143	9.043	77109.7
TG(20:5/13:1/20:4)	TG	20:5/13:1/20:4	2 days, 5:10:00	856.658	C56 H88 O6	11.873	2.011	0	212300	68727.9	355872	143572	426900	426900	426900	67.627	0	0
TG(24:0)	TG	1 day, 0:00:00	1 day, 0:00:00	470.361	C27 H50 O6	13.503	0.798	0.829	16050	3149.49	28950.5	12900.5	12800	11098.1	14501.9	80.377	13.296	1701.89
TG(24:0/13:1/23:5)	TG	24:0/13:1/23:5	2 days, 12:06:00	962.83	C63 H110 O6	1.1	0.392	0.209	248900	47099.3	450701	201801	97470	97470	97470	81.077	0	0
TG(24:0/14:1/14:1)	TG	24:0/14:1/14:1	2 days, 4:02:00	858.768	C55 H102 O6	9.193	0.005	0	5262	5262	5262	0	27.59	23.2449	31.9351	0	15.749	4.34515
TG(24:3/12:0/17:1)	TG	24:3/12:0/17:1	2 days, 5:04:00	868.752	C56 H100 O6	10.309	311782	0	1	1	1	0	311800	200827	422773	0	35.591	110973
TG(24:5/14:1/16:0)	TG	24:5/14:1/16:0	2 days, 6:06:00	878.736	C57 H98 O6	9.594	563034	0	1	1	1	0	563000	351791	774209	0	37.515	211209
TG(24:5/9:0/9:0)	TG	24:5/9:0/9:0	1 day, 18:05:00	712.564	C45 H76 O6	8.288	33.633	0.167	4461	1819.51	7102.49	2641.49	150000	112143	187857	59.213	25.238	37857
TG(24:6/14:1/17:3)	TG	24:6/14:1/17:3	2 days, 7:10:00	884.689	C58 H92 O6	9.243	444059	0	1	1	1	0	444100	427091	461109	0	3.83	17009
TG(25:0/14:0/14:0)	TG	25:0/14:0/14:0	2 days, 5:00:00	876.815	C56 H108 O6	12.819	1.261	0.246	358800	310656	406944	48143.8	452600	254782	650418	13.418	43.707	197818
TG(25:2/13:1/20:5)	TG	25:2/13:1/20:5	2 days, 10:08:00	930.768	C61 H102 O6	1.073	0.426	0.037	440100	141065	739135	299035	187300	36057.1	338543	67.947	80.749	151243
TG(25:5/15:0/19:5)	TG	25:5/15:0/19:5	2 days, 11:10:00	940.752	C62 H100 O6	12.177	1.662	0	2104	1149.25	3058.75	954.753	3496	2795.79	4196.21	45.378	20.029	700.214
TG(26:2/16:0/16:0)	TG	26:2/16:0/16:0	2 days, 10:02:00	942.861	C61 H114 O6	11.745	1.585	0	222000	94352.2	349648	127648	352000	53539.2	650461	57.499	84.79	298461
TG(26:3/13:0/13:0)	TG	26:3/13:0/13:0	2 days, 4:03:00	856.752	C55 H100 O6	11.912	117.949	0.224	6202	-134.956	12539	6336.96	731500	731500	731500	102.176	0	0
TG(26:6/8:0/8:0)	TG	26:6/8:0/8:0	1 day, 18:06:00	710.548	C45 H74 O6	4.049	1.58232e+06	0	1	1	1	0	1582000	827101	2.3369e+06	0	47.718	754899
TG(27:0)	TG	1 day, 3:00:00	1 day, 3:00:00	512.408	C30 H56 O6	11.15	1.361	0.036	2601000	1.60911e+06	3.59289e+06	991891	3539000	1.89616e+06	5.18184e+06	38.135	46.421	1.64284e+06
TG(28:5/13:1/22:1)	TG	28:5/13:1/22:1	2 days, 15:07:00	1002.86	C66 H114 O6	1.06	0.453	0.205	1797000	460463	3.13354e+06	1.33654e+06	813500	813500	813500	74.376	0	0
TG(28:6/9:0/16:1)	TG	28:6/9:0/16:1	2 days, 5:07:00	862.705	C56 H94 O6	11.913	1.238	0	804800	313526	1.29607e+06	491274	996100	720897	1.2713e+06	61.043	27.628	275203
TG(29:0/10:0/13:0)	TG	29:0/10:0/13:0	2 days, 4:00:00	862.799	C55 H106 O6	11.913	0.018	0	1836	1836	1836	0	32.54	-55.7095	120.789	0	271.203	88.2495
TG(29:4/17:2/22:2)	TG	29:4/17:2/22:2	2 days, 20:08:00	1070.92	C71 H122 O6	9.074	0.578	0.287	4033	2216.58	5849.42	1816.42	2329	1013.02	3644.98	45.039	56.504	1315.98
TG(29:5/13:1/14:0)	TG	29:5/13:1/14:0	2 days, 8:06:00	906.768	C59 H102 O6	1.053	0.972	0.858	1174000	670542	1.67746e+06	503458	1141000	543846	1.73815e+06	42.884	52.336	597154
TG(30:0/10:0/24:6)	TG	30:0/10:0/24:6	2 days, 16:06:00	1018.89	C67 H118 O6	8.871	111.377	0.183	4124	1636.65	6611.35	2487.35	459300	413554	505046	60.314	9.96	45746.3
TG(30:1/13:1/23:6)	TG	30:1/13:1/23:6	2 days, 18:08:00	1042.89	C69 H118 O6	1.094	0.826	0.478	62990	14611.8	111368	48378.2	52010	36902.1	67117.9	76.803	29.048	15107.9
TG(30:2)	TG	1 day, 6:02:00	1 day, 6:02:00	550.423	C33 H58 O6	13.122	0.958	0.935	3317	3075.95	3558.05	241.046	3178	3178	3178	7.267	0	0
TG(30:4/13:1/24:0)	TG	30:4/13:1/24:0	2 days, 19:05:00	1062.96	C70 H126 O6	1.095	1.116	0.41	323200	122053	524347	201147	360700	360700	360700	62.236	0	0
TG(32:3)	TG	1 day, 8:03:00	1 day, 8:03:00	576.439	C35 H60 O6	9.558	1.027	0.1	13110	5423.48	20796.5	7686.52	13460	5706.23	21213.8	58.631	57.606	7753.77
TG(32:5)	TG	1 day, 8:05:00	1 day, 8:05:00	572.408	C35 H56 O6	9.711	0.977	0.215	76770000	1.30647e+07	1.40475e+08	6.37053e+07	75030000	4.49782e+07	1.05082e+08	82.982	40.053	3.00518e+07
TG(33:1)	TG	1 day, 9:01:00	1 day, 9:01:00	594.486	C36 H66 O6	6.359	2.098	0.69	174500	46183.2	302817	128317	366200	338464	393936	73.534	7.574	27736
TG(34:3)	TG	1 day, 10:03:00	1 day, 10:03:00	604.47	C37 H64 O6	9.827	10.387	0.105	133800	69917.2	197683	63882.8	1390000	526782	2.25322e+06	47.745	62.102	863218
TG(35:3)	TG	1 day, 11:03:00	1 day, 11:03:00	618.486	C38 H66 O6	11.312	0.939	0.643	143500	95664.3	191336	47835.7	134800	101313	168287	33.335	24.842	33487
TG(37:4)	TG	1 day, 13:04:00	1 day, 13:04:00	644.502	C40 H68 O6	7.356	1.352	0.214	1176000	274220	2.07778e+06	901780	1589000	1.24632e+06	1.93168e+06	76.682	21.566	342684
TG(38:3)	TG	1 day, 14:03:00	1 day, 14:03:00	660.533	C41 H72 O6	9.379	0.681	0.834	112900	49048.3	176752	63851.7	76860	48482.5	105237	56.556	36.921	28377.5
TG(39:2p)	TG	39:2p	39:2p	660.569	C42 H76 O5	11.656	226.639	0.497	30300	22099.6	38500.4	8200.39	6867000	2.587e+06	1.1147e+07	27.064	62.327	4.28e+06
TG(4:0/10:0/12:0)	TG	4:0/10:0/12:0	1 day, 2:00:00	498.392	C29 H54 O6	3.765	238052	0	1	1	1	0	238100	129769	346431	0	45.498	108331
TG(4:0/10:0/12:0)	TG	4:0/10:0/12:0	1 day, 2:00:00	498.392	C29 H54 O6	6.225	0.895	0.671	3051000	2.70538e+06	3.39662e+06	345617	2729000	1.48654e+06	3.97146e+06	11.328	45.528	1.24246e+06
TG(4:0/10:0/13:1)	TG	4:0/10:0/13:1	1 day, 3:01:00	510.392	C30 H54 O6	1.042	156.525	0.244	60320	29807.7	90832.3	30512.3	9442000	6.65699e+06	1.2227e+07	50.584	29.496	2.78501e+06
TG(4:0/10:0/16:1)	TG	4:0/10:0/16:1	1 day, 6:01:00	552.439	C33 H60 O6	11.085	4.44	0.165	125200	46158.7	204241	79041.3	556100	334995	777205	63.132	39.76	221105
TG(4:0/10:0/19:1)	TG	4:0/10:0/19:1	1 day, 9:01:00	594.486	C36 H66 O6	7.472	1.157	0.723	2059000	734445	3.38355e+06	1.32455e+06	2383000	1.88755e+06	2.87845e+06	64.33	20.791	495450
TG(4:0/10:0/19:5)	TG	4:0/10:0/19:5	1 day, 9:05:00	586.423	C36 H58 O6	8.252	1.445	0.311	3609000	593644	6.62436e+06	3.01536e+06	5217000	5217000	5217000	83.551	0	0
TG(4:0/10:0/24:7)	TG	4:0/10:0/24:7	1 day, 14:07:00	652.47	C41 H64 O6	8.119	1.921	0.158	1878000	524150	3.23185e+06	1.35385e+06	3608000	2494932	4721068	72.09	30.85	1113068
TG(4:0/11:0/11:0)	TG	4:0/11:0/11:0	1 day, 2:00:00	498.392	C29 H54 O6	7.516	0.922	0.767	1562000	788091	2.33591e+06	773909	1440000	1440000	1440000	49.546	0	0
TG(4:0/12:0/15:2)	TG	4:0/12:0/15:2	1 day, 7:02:00	564.439	C34 H60 O6	8.297	1.688	0.201	3058000	598084	5.51792e+06	2.45992e+06	5164000	2956390	7371610	80.442	42.75	2207610
TG(4:0/12:0/19:4)	TG	4:0/12:0/19:4	1 day, 11:04:00	616.47	C38 H64 O6	10.255	2.402	0.75	29870	19192.7	40547.3	10677.3	71760	71760	71760	35.746	0	0
TG(4:0/12:0/21:6)	TG	4:0/12:0/21:6	1 day, 13:06:00	640.47	C40 H64 O6	11.501	0.878	0.642	948600	707219	1.18998e+06	241381	832700	736881	928519	25.446	11.507	95818.8
TG(4:0/12:0/24:6)	TG	4:0/12:0/24:6	1 day, 16:06:00	682.517	C43 H70 O6	7.302	16.677	0.076	84670	68271.1	101069	16398.9	1412000	783152	2.04085e+06	19.368	44.536	628848
TG(4:0/13:0/15:0)	TG	4:0/13:0/15:0	1 day, 8:00:00	582.486	C35 H66 O6	9.82	6.134	0.063	106500	71079.2	141921	35420.8	653000	653000	653000	33.259	0	0
TG(4:0/13:0/18:2)	TG	4:0/13:0/18:2	1 day, 11:02:00	620.502	C38 H68 O6	9.554	3.093	0	1642000	233706	3.05029e+06	1.40829e+06	5080000	4.44287e+06	5.71713e+06	85.767	12.542	637134
TG(4:0/13:0/19:5)	TG	4:0/13:0/19:5	1 day, 12:05:00	628.47	C39 H64 O6	9.678	171.156	0.239	4112	3558.65	4665.35	553.352	703800	703800	703800	13.457	0	0
TG(4:0/13:1/15:2)	TG	4:0/13:1/15:2	1 day, 8:03:00	576.439	C35 H60 O6	12.355	0.835	0.87	11220	7346.3	15093.7	3873.7	9372	9372	9372	34.525	0	0
TG(4:0/13:1/16:2)	TG	4:0/13:1/16:2	1 day, 9:03:00	590.455	C36 H62 O6	7.903	0.409	0.71	132700	21228	244172	111472	54250	45729	62771	84.003	15.707	8521.05
TG(4:0/13:1/19:2)	TG	4:0/13:1/19:2	1 day, 12:03:00	632.502	C39 H68 O6	1.072	497.863	0.167	98380	21001.2	175759	77378.8	48980000	1.5056e+07	8.2904e+07	78.653	69.261	3.3924e+07
TG(4:0/14:1/14:1)	TG	4:0/14:1/14:1	1 day, 8:02:00	578.455	C35 H62 O6	4.169	178.15	0	861.6	318.663	1404.54	542.937	153500	67736.5	239264	63.015	55.872	85763.5
TG(4:0/14:1/17:3)	TG	4:0/14:1/17:3	1 day, 11:04:00	616.47	C38 H64 O6	9.428	0.979	0.317	491300	260988	721612	230312	481100	481100	481100	46.878	0	0
TG(4:0/14:1/22:4)	TG	4:0/14:1/22:4	1 day, 16:05:00	684.533	C43 H72 O6	10.828	1.454	0.631	10890	2493.16	19286.8	8396.84	15840	11351.7	20328.3	77.106	28.335	4488.26
TG(4:0/15:1/15:1)	TG	4:0/15:1/15:1	1 day, 10:02:00	606.486	C37 H66 O6	6.346	0.703	0.707	5022	1731.18	8312.82	3290.82	3529	1639.93	5418.07	65.528	53.53	1889.07
TG(4:0/15:1/15:1)	TG	4:0/15:1/15:1	1 day, 10:02:00	606.486	C37 H66 O6	13.372	0.804	0.301	93510	59118	127902	34392	75150	75150	75150	36.779	0	0
TG(4:0/15:2/16:2)	TG	4:0/15:2/16:2	1 day, 11:04:00	616.47	C38 H64 O6	7.992	0.78	0.524	2802000	1.14069e+06	4.46331e+06	1.66131e+06	2187000	823887	3.55011e+06	59.29	62.328	1.36311e+06
TG(4:0/15:2/19:1)	TG	4:0/15:2/19:1	1 day, 14:03:00	660.533	C41 H72 O6	12.063	2184.35	0	2856	1774.32	3937.68	1081.68	6238000	3.42054e+06	9.05546e+06	37.874	45.166	2.81746e+06
TG(4:0/15:2/20:1)	TG	4:0/15:2/20:1	1 day, 15:03:00	674.548	C42 H74 O6	8.079	1.605	0.083	1827000	732134	2.92187e+06	1.09487e+06	2933000	2.0333e+06	3.8327e+06	59.927	30.675	899698
TG(4:0/15:2/22:0)	TG	4:0/15:2/22:0	1 day, 17:02:00	704.596	C44 H80 O6	7.272	0.011	0.033	723700	205965	1.24143e+06	517735	8161	4134.28	12187.7	71.54	49.341	4026.72
TG(4:0/17:0/19:4)	TG	4:0/17:0/19:4	1 day, 16:04:00	686.548	C43 H74 O6	11.555	1.374	0.597	25850	6310.76	45389.2	19539.2	35520	23463.4	47576.6	75.587	33.943	12056.6
TG(4:0/17:3/23:6)	TG	4:0/17:3/23:6	1 day, 20:09:00	732.533	C47 H72 O6	10.818	0.725	0.855	17190000	1.17504e+07	2.26296e+07	5.4396e+06	12460000	8086540	16833460	31.644	35.1	4373460
TG(4:0/18:0/20:2)	TG	4:0/18:0/20:2	1 day, 18:02:00	718.611	C45 H82 O6	6.527	53.906	0	2507	-981.992	5995.99	3488.99	135100	70518.1	199682	139.17	47.803	64581.9
TG(4:0/18:1/24:6)	TG	4:0/18:1/24:6	1 day, 22:07:00	764.596	C49 H80 O6	8.915	0.961	0.31	87080000	80318238	93841762	6761762	83660000	4.631e+07	121010007	7.765	44.645	3.735e+07
TG(4:0/18:3/21:6)	TG	4:0/18:3/21:6	1 day, 19:09:00	718.517	C46 H70 O6	10.646	1.691	0.005	2139000	1.60874e+06	2.66926e+06	530258	3616000	3616000	3616000	24.79	0	0
TG(4:0/18:3/23:5)	TG	4:0/18:3/23:5	1 day, 21:08:00	748.564	C48 H76 O6	5.677	0.866	0.439	2490	581.042	4398.96	1908.96	2158	1555.94	2760.06	76.665	27.899	602.06
TG(4:0/20:5/21:1)	TG	4:0/20:5/21:1	1 day, 21:06:00	752.596	C48 H80 O6	8.906	1.068	0.793	745200	652259	838141	92941.3	796100	222064	1.37014e+06	12.472	72.106	574036
TG(4:0/20:5/23:1)	TG	4:0/20:5/23:1	1 day, 23:06:00	780.627	C50 H84 O6	9.535	2.429	0.026	251200	65291.9	437108	185908	610100	610100	610100	74.008	0	0
TG(4:0/21:6/24:6)	TG	4:0/21:6/24:6	2 days, 1:12:00	796.564	C52 H76 O6	8.917	0.922	0.466	85820000	1.95258e+07	1.52114e+08	6.62942e+07	79120000	2.32644e+07	1.34976e+08	77.248	70.596	5.58556e+07
TG(4:0/24:2/24:7)	TG	4:0/24:2/24:7	2 days, 4:09:00	844.658	C55 H88 O6	11.722	0.756	0.226	2411000	1.53412e+06	3.28788e+06	876881	1823000	1.08339e+06	2.56261e+06	36.37	40.571	739609
TG(4:0/8:0/13:1)	TG	4:0/8:0/13:1	1 day, 1:01:00	482.361	C28 H50 O6	2.795	0.668	0.412	83260	62261.8	104258	20998.2	55650	35278.2	76021.8	25.22	36.607	20371.8
TG(4:0/8:0/14:0)	TG	4:0/8:0/14:0	1 day, 2:00:00	498.392	C29 H54 O6	6.576	33.225	0.236	30600	17592.9	43607.1	13007.1	1017000	398359	1.63564e+06	42.507	60.83	618641
TG(4:0/8:0/16:2)	TG	4:0/8:0/16:2	1 day, 4:02:00	522.392	C31 H54 O6	7.518	1.433	0.631	985100	781657	1.18854e+06	203443	1412000	1412000	1412000	20.652	0	0
TG(4:0/8:0/20:1)	TG	4:0/8:0/20:1	1 day, 8:01:00	580.47	C35 H64 O6	9.589	1.28	0.482	23810	8784.46	38835.5	15025.5	30490	26510.8	34469.2	63.106	13.051	3979.25
TG(4:0/8:0/20:5)	TG	4:0/8:0/20:5	1 day, 8:05:00	572.408	C35 H56 O6	9.219	1.068	0.843	5331000	1.6371e+06	9.0249e+06	3.6939e+06	5694000	4.39941e+06	6.98859e+06	69.291	22.736	1.29459e+06
TG(4:0/8:0/21:6)	TG	4:0/8:0/21:6	1 day, 9:06:00	584.408	C36 H56 O6	11.088	0.918	0.375	758600	211862	1.30534e+06	546738	696200	333501	1.0589e+06	72.072	52.097	362699
TG(4:0/8:0/22:2)	TG	4:0/8:0/22:2	1 day, 10:02:00	606.486	C37 H66 O6	0.914	1.033	0.853	40970	31995.1	49944.9	8974.89	42320	23936.6	60703.4	21.906	43.439	18383.4
TG(4:0/8:0/22:2)	TG	4:0/8:0/22:2	1 day, 10:02:00	606.486	C37 H66 O6	5.763	0.568	0.572	5022	1731.18	8312.82	3290.82	2852	2299	3405	65.528	19.39	553.003
TG(4:0/8:0/8:0)	TG	4:0/8:0/8:0	20:00:00	414.298	C23 H42 O6	3.792	0.976	0.944	13970	8413.85	19526.1	5556.15	13640	7860.6	19419.4	39.772	42.371	5779.4
TG(4:0/8:0/9:0)	TG	4:0/8:0/9:0	21:00:00	428.314	C24 H44 O6	12.786	76.962	0.234	516600	296503	736697	220097	39760000	1.06728e+07	6.88472e+07	42.605	73.157	2.90872e+07
TG(4:0/9:0/11:0)	TG	4:0/9:0/11:0	1 day, 0:00:00	470.361	C27 H50 O6	1.103	2.533	0.171	7050	4640.45	9459.55	2409.55	17860	16266.5	19453.5	34.178	8.922	1593.47
TG(4:0/9:0/12:0)	TG	4:0/9:0/12:0	1 day, 1:00:00	484.376	C28 H52 O6	12.685	1.11	0.871	513800	360898	666702	152902	570500	570500	570500	29.759	0	0
TG(4:0/9:0/13:0)	TG	4:0/9:0/13:0	1 day, 2:00:00	498.392	C29 H54 O6	1.854	0.996	0.27	1352000	1291836	1412164	60164	1346000	752602	1.9394e+06	4.45	44.086	593398
TG(4:0/9:0/16:2)	TG	4:0/9:0/16:2	1 day, 5:02:00	536.408	C32 H56 O6	6.11	1.122	0.035	527700	449257	606143	78442.6	592200	441189	743211	14.865	25.5	151011
TG(4:0/9:0/19:5)	TG	4:0/9:0/19:5	1 day, 8:05:00	572.408	C35 H56 O6	5.981	0.745	0.859	18620000	1.49217e+07	2.23183e+07	3.6983e+06	13870000	2.97026e+06	2.47697e+07	19.862	78.585	1.08997e+07
TG(4:0/9:0/19:5)	TG	4:0/9:0/19:5	1 day, 8:05:00	572.408	C35 H56 O6	8.903	0.66	0.007	4991000	3.27574e+06	6.70626e+06	1.71526e+06	3296000	3296000	3296000	34.367	0	0
TG(4:0/9:0/9:0)	TG	4:0/9:0/9:0	22:00:00	442.329	C25 H46 O6	1.076	0.803	0.569	34360000	5.45912e+06	6.32609e+07	2.89009e+07	27610000	22709225	32510775	84.112	17.75	4900775
TG(41:0e)	TG	41:0e	41:0e	694.648	C44 H86 O5	5.615	428.788	0.297	6575	1246.42	11903.6	5328.58	2819000	2819000	2819000	81.043	0	0
TG(42:1)	TG	1 day, 18:01:00	1 day, 18:01:00	720.627	C45 H84 O6	9.142	2.041	0.129	3786	1312.53	6259.47	2473.47	7726	4846.44	10605.6	65.332	37.271	2879.56
TG(43:9)	TG	1 day, 19:09:00	1 day, 19:09:00	718.517	C46 H70 O6	7.996	1.628	0.319	1136000	365599	1.9064e+06	770401	1849000	1.18789e+06	2.51011e+06	67.817	35.755	661110
TG(45:5p)	TG	45:5p	45:5p	738.616	C48 H82 O5	5.57	0.486	0	3969	2121.51	5816.49	1847.49	1928	1928	1928	46.548	0	0
TG(46:8)	TG	1 day, 22:08:00	1 day, 22:08:00	762.58	C49 H78 O6	8.331	2.68	0.104	234500	194541	274459	39958.8	628600	178698	1.0785e+06	17.04	71.572	449902
TG(46:9)	TG	1 day, 22:09:00	1 day, 22:09:00	760.564	C49 H76 O6	9.043	1.118	0.976	474500	442381	506619	32118.9	530700	226970	834430	6.769	57.232	303730
TG(47:2)	TG	1 day, 23:02:00	1 day, 23:02:00	788.689	C50 H92 O6	3.833	304.288	0.419	1389	-557.697	3335.7	1946.7	422800	321353	524247	140.151	23.994	101447
TG(48:5)	TG	2 days, 0:05:00	2 days, 0:05:00	796.658	C51 H88 O6	11.688	1.033	0.529	227300	166868	287732	60432.3	234700	186957	282443	26.587	20.342	47742.7
TG(51:3p)	TG	51:3p	51:3p	826.741	C54 H98 O5	5.48	0.401	0	4930	1686.26	8173.74	3243.74	1975	855.728	3094.27	65.796	56.672	1119.27
TG(52:3e)	TG	52:3e	52:3e	842.773	C55 H102 O5	3.826	51.143	0.176	3183	1614.96	4751.04	1568.04	162800	85759.8	239840	49.263	47.322	77040.2
TG(52:5e)	TG	52:5e	52:5e	838.741	C55 H98 O5	8.742	2.076	0.024	2125	1099.6	3150.4	1025.4	4411	4411	4411	48.254	0	0
TG(52:5p)	TG	52:5p	52:5p	836.726	C55 H96 O5	5.6	456.496	0.347	4819	1861.39	7776.61	2957.61	2200000	1494482	2905518	61.374	32.069	705518
TG(52:7)	TG	2 days, 4:07:00	2 days, 4:07:00	848.689	C55 H92 O6	7.727	44.421	0.273	2889	2694.74	3083.26	194.256	128300	128300	128300	6.724	0	0
TG(55:8)	TG	2 days, 7:08:00	2 days, 7:08:00	888.721	C58 H96 O6	12.734	44404	0.08	1	1	1	0	44400	26118.3	62681.7	0	41.175	18281.7
TG(55:9)	TG	2 days, 7:09:00	2 days, 7:09:00	886.705	C58 H94 O6	3.834	114.665	0.179	2574	1370.42	3777.58	1203.58	295100	138538	451662	46.759	53.054	156562
TG(6:0/10:0/12:0)	TG	6:0/10:0/12:0	1 day, 4:00:00	526.423	C31 H58 O6	8.349	1.957	0.195	2744000	595585	4.89241e+06	2.14841e+06	5370000	2.78682e+06	7.95318e+06	78.295	48.104	2.58318e+06
TG(6:0/10:0/15:1)	TG	6:0/10:0/15:1	1 day, 7:01:00	566.455	C34 H62 O6	9.828	0.579	0.726	35430	7437.47	63422.5	27992.5	20530	19113.8	21946.2	79.008	6.898	1416.16
TG(6:0/10:0/17:0)	TG	6:0/10:0/17:0	1 day, 9:00:00	596.502	C36 H68 O6	1.026	0.679	0.767	276400	42258.8	510541	234141	187700	187700	187700	84.711	0	0
TG(6:0/11:0/13:1)	TG	6:0/11:0/13:1	1 day, 6:01:00	552.439	C33 H60 O6	1.047	1.353	0.679	5817000	2.58362e+06	9.05038e+06	3.23338e+06	7870000	5.54898e+06	1.0191e+07	55.585	29.492	2.32102e+06
TG(6:0/12:0/15:2)	TG	6:0/12:0/15:2	1 day, 9:02:00	592.47	C36 H64 O6	8.207	1.952	0.173	2590000	604661	4.57534e+06	1.98534e+06	5056000	5056000	5056000	76.654	0	0
TG(6:0/12:0/15:2)	TG	6:0/12:0/15:2	1 day, 9:02:00	592.47	C36 H64 O6	10.88	2.391	0	710500	437860	983140	272640	1699000	1699000	1699000	38.373	0	0
TG(6:0/12:0/17:0)	TG	6:0/12:0/17:0	1 day, 11:00:00	624.533	C38 H72 O6	5.733	0	0	132700	132700	132700	0	28.85	23.1804	34.5196	0	19.652	5.6696
TG(6:0/13:0/21:4)	TG	6:0/13:0/21:4	1 day, 16:04:00	686.548	C43 H74 O6	8.113	6.015	0.119	109400	72867	145933	36533	658300	658300	658300	33.394	0	0
TG(6:0/13:1/13:1)	TG	6:0/13:1/13:1	1 day, 8:02:00	578.455	C35 H62 O6	1.073	0.931	0.724	104100	19318.9	188881	84781.1	96870	96870	96870	81.442	0	0
TG(6:0/13:1/20:4)	TG	6:0/13:1/20:4	1 day, 15:05:00	670.517	C42 H70 O6	1.095	209.902	0	34250	18470.3	50029.7	15779.7	7189000	5.75062e+06	8.62738e+06	46.072	20.008	1.43838e+06
TG(6:0/13:1/22:2)	TG	6:0/13:1/22:2	1 day, 17:03:00	702.58	C44 H78 O6	1.045	0.928	0.811	42070	12401.4	71738.6	29668.6	39060	35689.5	42430.5	70.522	8.629	3370.49
TG(6:0/14:1/23:1)	TG	6:0/14:1/23:1	1 day, 19:02:00	732.627	C46 H84 O6	10.484	0.976	0.003	38290	31050.5	45529.5	7239.49	37370	20228	54512	18.907	45.871	17142
TG(6:0/15:2/17:1)	TG	6:0/15:2/17:1	1 day, 14:03:00	660.533	C41 H72 O6	8.914	0.681	0.995	112900	40802.1	184998	72097.9	76860	33374.1	120346	63.86	56.578	43485.9
TG(6:0/15:2/21:4)	TG	6:0/15:2/21:4	1 day, 18:06:00	710.548	C45 H74 O6	7.226	1.632	0.292	472900	180634	765166	292266	771700	771700	771700	61.803	0	0
TG(6:0/16:0/23:5)	TG	6:0/16:0/23:5	1 day, 21:05:00	754.611	C48 H82 O6	7.154	398659	0	1	1	1	0	398700	393318	404082	0	1.35	5382.45
TG(6:0/16:2/23:1)	TG	6:0/16:2/23:1	1 day, 21:03:00	758.642	C48 H86 O6	9.072	0.83	0.298	684500	490540	878460	193960	568000	448459	687541	28.336	21.046	119541
TG(6:0/17:3/24:6)	TG	6:0/17:3/24:6	1 day, 23:09:00	774.58	C50 H78 O6	9.065	0.512	0.088	573600	383853	763347	189747	293400	293400	293400	33.08	0	0
TG(6:0/19:2/23:1)	TG	6:0/19:2/23:1	2 days, 0:03:00	800.689	C51 H92 O6	9.906	0.691	0.343	533200	413609	652791	119591	368400	368400	368400	22.429	0	0
TG(6:0/21:6/23:6)	TG	6:0/21:6/23:6	2 days, 2:12:00	810.58	C53 H78 O6	9.093	1.028	0.615	246200	227634	264766	18565.9	253000	124357	381643	7.541	50.847	128643
TG(6:0/8:0/24:0)	TG	6:0/8:0/24:0	1 day, 14:00:00	666.58	C41 H78 O6	7.309	0.008	0	259800	259800	259800	0	2085	106.669	4063.33	0	94.884	1978.33
TG(6:0/8:0/9:0)	TG	6:0/8:0/9:0	23:00:00	456.345	C26 H48 O6	10.927	1.309	0.753	303900	151762	456038	152138	397900	211150	584650	50.062	46.934	186750
TG(6:0/9:0/18:1)	TG	6:0/9:0/18:1	1 day, 9:01:00	594.486	C36 H66 O6	7.808	0.012	0	236700	236700	236700	0	2801	2143.16	3458.84	0	23.486	657.843
TG(6:0/9:0/23:4)	TG	6:0/9:0/23:4	1 day, 14:04:00	658.517	C41 H70 O6	8.07	1.534	0.246	1920000	649421	3.19058e+06	1.27058e+06	2946000	745426	5.14657e+06	66.176	74.697	2.20057e+06
TG(6:0/9:0/24:7)	TG	6:0/9:0/24:7	1 day, 15:07:00	666.486	C42 H66 O6	1.114	124.536	0.259	55680	29850.6	81509.4	25829.4	6935000	4.32446e+06	9.54554e+06	46.389	37.643	2.61054e+06
TG(60:7)	TG	2 days, 12:07:00	2 days, 12:07:00	960.815	C63 H108 O6	12.224	0.731	0.362	972100	356547	1.58765e+06	615553	710100	483976	936224	63.322	31.844	226124
TG(63:11)	TG	2 days, 15:11:00	2 days, 15:11:00	994.799	C66 H106 O6	8.821	3.132	0.051	2351	1896.03	2805.97	454.966	7363	4172.02	10554	19.352	43.338	3190.98
TG(68:13)	TG	2 days, 20:13:00	2 days, 20:13:00	1060.85	C71 H112 O6	8.956	0.939	0.615	679200	621903	736497	57297.3	637600	416754	858446	8.436	34.637	220846
TG(8:0/12:0/18:1)	TG	8:0/12:0/18:1	1 day, 14:01:00	664.564	C41 H76 O6	11.402	1.103	0.159	424000	379912	468088	44087.5	467700	467700	467700	10.398	0	0
TG(8:0/13:0/13:0)	TG	8:0/13:0/13:0	1 day, 10:00:00	610.517	C37 H70 O6	7.348	0.752	0.664	3885	1570.47	6199.53	2314.53	2922	1117.55	4726.45	59.576	61.754	1804.45
TG(8:0/8:0/19:4)	TG	8:0/8:0/19:4	1 day, 11:04:00	616.47	C38 H64 O6	11.633	1.092	0.339	12430000	8.29491e+06	1.65651e+07	4.13509e+06	13580000	5.05746e+06	2.21025e+07	33.267	62.758	8.52254e+06
TG(8:0/8:0/20:3)	TG	8:0/8:0/20:3	1 day, 12:03:00	632.502	C39 H68 O6	11.176	0.942	0.878	1211000	1.04988e+06	1.37212e+06	161124	1141000	554435	1.72757e+06	13.305	51.408	586565
TG(8:0/8:0/21:0)	TG	8:0/8:0/21:0	1 day, 13:00:00	652.564	C40 H76 O6	11.504	0.582	0.626	90380	41122	139638	49258	52610	31092.5	74127.5	54.501	40.9	21517.5
TG(8:0/8:0/22:4)	TG	8:0/8:0/22:4	1 day, 14:04:00	658.517	C41 H70 O6	7.56	357398	0.351	1	1	1	0	357400	318422	396378	0	10.906	38978
TG(8:0/8:0/8:0)	TG	8:0/8:0/8:0	1 day, 0:00:00	470.361	C27 H50 O6	3.509	0.976	0.21	572200	530881	613519	41318.6	558200	246077	870323	7.221	55.916	312123
TG(8:0/9:0/9:0)	TG	8:0/9:0/9:0	1 day, 2:00:00	498.392	C29 H54 O6	2.507	0.933	0.235	702100	645033	759167	57066.7	655000	655000	655000	8.128	0	0
TG(9:0/15:2/24:6)	TG	9:0/15:2/24:6	2 days, 0:08:00	790.611	C51 H82 O6	9.067	1.033	0.956	639000	493608	784392	145392	660000	304168	1.01583e+06	22.753	53.914	355832
TG(9:0/18:2/19:4)	TG	9:0/18:2/19:4	1 day, 22:06:00	766.611	C49 H82 O6	10.28	12.559	0.005	9765	2789.76	16740.2	6975.24	122600	97426.5	147773	71.431	20.533	25173.5
TG(9:0/9:0/9:0)	TG	9:0/9:0/9:0	1 day, 3:00:00	512.408	C30 H56 O6	7.337	2.26	0.291	24260	11867.7	36652.3	12392.3	54820	54820	54820	51.081	0	0
